1 **Metabolic pathway rerouting in *Paraburkholderia rhizoxinica* evolved long-overlooked derivatives**  
2 **of coenzyme F<sub>420</sub>.**

3

4 Daniel Braga<sup>a,d</sup>, Daniel Last<sup>a</sup>, Mahmudul Hasan<sup>a,d</sup>, Huijuan Guo<sup>b</sup>, Daniel Lechnitz<sup>b</sup>, Zerrin Uzum<sup>c</sup>,  
5 Ingrid Richter<sup>c</sup>, Felix Schalk<sup>b</sup>, Christine Beemelmans<sup>b</sup>, Christian Hertweck<sup>c,d</sup>, and Gerald Lackner<sup>a,d</sup>\*

6 **Author affiliations**

7 <sup>a</sup>Junior Research Group Synthetic Microbiology  
8 Leibniz Institute for Natural Product Research and Infection Biology – Hans Knöll Institute  
9 Beutenbergstr 11a, 07745 Jena, Germany

10

11 <sup>b</sup>Junior Research Group Chemical Biology of Microbe-Host Interactions  
12 Leibniz Institute for Natural Product Research and Infection Biology – Hans Knöll Institute  
13 Beutenbergstr 11a, 07745 Jena, Germany

14

15 <sup>c</sup>Department of Biomolecular Chemistry  
16 Leibniz Institute for Natural Product Research and Infection Biology – Hans Knöll Institute  
17 Beutenbergstr 11a, 07745 Jena, Germany

18

19 <sup>d</sup>Friedrich Schiller University, Jena

20

21 **\*Corresponding author:**

22 Dr. Gerald Lackner  
23 E-Mail: [gerald.lackner@leibniz-hki.de](mailto:gerald.lackner@leibniz-hki.de)  
24 Phone: +49 3631 532 1104

25

26 **Author contributions and conflict of interest**

27 Daniel Braga performed research, analyzed data (molecular biology, malachite green assay, mass spectrometry)  
28 and contributed to writing the manuscript, Daniel Last performed research and analyzed data (structure  
29 elucidation, Fno assay, biogas plant studies), Mahmudul Hasan performed research (CofC/D enzyme assays),  
30 Huijuan Guo performed research and analyzed data (structure elucidation), Daniel Lechnitz performed research  
31 (chemical synthesis), Zerrin Uzum performed research (microscopy), Ingrid Richter performed research  
32 (microscopy), Felix Schalk performed research (*cofE* constructs), Christine Beemelmans designed research,  
33 acquired funding, analyzed data (structure elucidation, synthesis) and edited the manuscript, Christian Hertweck  
34 designed research, acquired funding and edited the manuscript, Gerald Lackner designed the study, acquired  
35 funding and wrote the original manuscript. The authors declare no conflict of interest.

36 **Keywords:** Cofactors, natural products, biocatalysis, symbiosis, deazaflavin

## 1 **Abstract**

2 Coenzyme F<sub>420</sub> is a specialized redox cofactor with a highly negative redox potential. It supports  
3 biochemical processes like methanogenesis, degradation of xenobiotics or the biosynthesis of  
4 antibiotics. Although well-studied in methanogenic archaea and actinobacteria, not much is known  
5 about F<sub>420</sub> in Gram-negative bacteria. Genome sequencing revealed F<sub>420</sub> biosynthetic genes in the  
6 Gram-negative, endofungal bacterium *Paraburkholderia rhizoxinica*, a symbiont of phytopathogenic  
7 fungi. Fluorescence microscopy, high-resolution LC-MS, and structure elucidation by NMR  
8 demonstrated that the encoded pathway is active and yields unexpected derivatives of F<sub>420</sub> (3PG-F<sub>420</sub>).  
9 Further analyses of a biogas-producing microbial community showed that these derivatives are more  
10 widespread in nature. Genetic and biochemical studies of their biosynthesis established that a  
11 specificity switch in the guanylyltransferase CofC re-programmed the pathway to start from 3-  
12 phospho-D-glycerate, suggesting a rerouting event during the evolution of F<sub>420</sub> biosynthesis.  
13 Furthermore, the cofactor activity of 3PG-F<sub>420</sub> was validated, thus opening up perspectives for its use  
14 in biocatalysis. The 3PG-F<sub>420</sub> biosynthetic gene cluster is fully functional in *Escherichia coli*, enabling  
15 convenient production of the cofactor by fermentation.

## 16 **Introduction**

17 Cofactors are essential for the catalytic power of many enzymes and thus play a key role in virtually all  
18 metabolic pathways. Knowledge of their catalytic functions and biosynthesis is highly important for  
19 the understanding of biochemical reactions as well as their application in biocatalysis and  
20 biotechnology. An important subclass comprises redox-cofactors that mediate electron transfer  
21 between molecules. The deazaflavin coenzyme F<sub>420</sub> (Figure 1) is a specialized redox cofactor with a  
22 lower redox potential (−350 mV) than NAD (1). This feature makes F<sub>420</sub> an ideal electron carrier  
23 between H<sub>2</sub> and NAD(P) in methanogenesis and renders it a strong reducing agent for challenging  
24 reactions in biocatalysis (2). For instance, enzymatic processes involving F<sub>420</sub> facilitate the degradation  
25 of pollutants like aromatic nitro compounds (3) or the carcinogen aflatoxin (4). Furthermore, F<sub>420</sub>-  
26 dependent enzymes are important for asymmetric ene reductions (5, 6). In actinomycetes, coenzyme  
27 F<sub>420</sub> is involved in the biosynthesis of antibiotics like oxytetracycline (7), pyrrolbenzodiazepines (8), or  
28 thiopeptins (9). Additionally, F<sub>420</sub> has attracted considerable interest as a fitness factor of the human  
29 pathogen *Mycobacterium tuberculosis*, being involved in nitrosative stress response (10) or prodrug-  
30 activation (11).

31

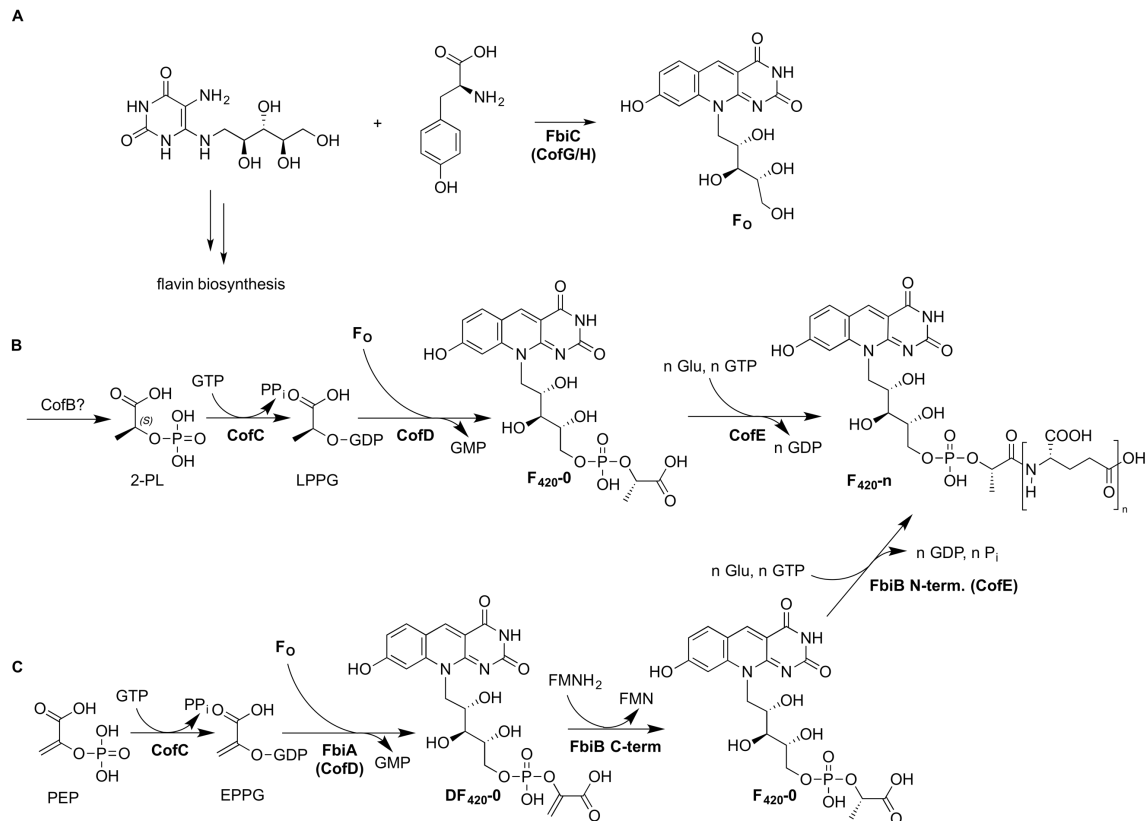

1  
2  
3  
4  
5  
6  
7  
8  
9

**Figure 1.** Biosynthesis of coenzyme  $F_{420}$  A)  $F_0$  synthase FbiC (in archaea: CofG/H) catalyzes formation of the deazaflavin ring from tyrosine and 5-amino-6-(ribitylamino)-uracil, an intermediate of riboflavin biosynthesis. B) Biosynthetic scheme of  $F_{420-n}$  proposed for archaea. CofC and CofD catalyze the activation of 2-PL and transfer of the 2-PL moiety, respectively. CofE performs (oligo)- $\gamma$ -glutamylation. The number of glutamate residues ( $n$ ) varies depending on the organism. The origin of 2-PL is unknown. C) Biosynthesis of  $F_{420-n}$  proposed for mycobacteria: CofC and CofD activate PEP resulting in  $DF_{420}$  formation. The C-terminal domain of FbiB reduces  $DF_{420}$  to  $F_{420}$ . EPPG: enolpyruvyl-diphosphoguanosine, LPPG: lactyl-diphosphoguanosine, 2-PL: 2-phospho-L-lactate.

10 A key step during the biosynthesis of  $F_{420}$  is the formation of the deazaflavin fluorophore  $F_0$  (Figure 1A),  
11 a stable metabolic precursor of  $F_{420}$  originating from tyrosine and an intermediate of riboflavin  
12 biosynthesis. This chemically challenging step is catalyzed by the radical SAM enzyme complex CofG/H  
13 in archaea or the homologous dual-domain protein FbiC in actinobacteria (12).  $F_0$  is then further  
14 processed by CofC (EC 2.7.7.68) and CofD (EC 2.7.8.28). This pair of enzymes is responsible for the  
15 biosynthesis of the 2-phospho-L-lactate (2-PL) moiety (Figure 1B). Previous studies have shown that  
16 CofC from *Methanocaldococcus jannaschii* directly activates 2-phospho-L-lactate (2-PL) by guanylation  
17 (13) resulting in the formation of the short-lived metabolite lactyl-diphosphoguanosine (LPPG). CofD  
18 then forms  $F_{420-0}$  by transfer of the 2-PL moiety from LPPG to  $F_0$  (14). The enzymes producing 2-PL,  
19 however, have remained elusive in all  $F_{420}$  producers so far. Recently, Bashiri *et al.* proposed a revised  
20 biosynthetic pathway by demonstrating that phosphoenolpyruvate (PEP) instead of 2-PL can serve as  
21 a substrate of CofC in *Mycobacteria* (15). The resulting dehydro- $F_{420}$  ( $DF_{420}$ ) is reduced to  $F_{420}$  by a flavin-  
22 dependent reductase domain present in the FbiB protein (Figure 1C). In mycobacteria, FbiB is a dual-

1 domain protein consisting of a  $\gamma$ -glutamyl ligase domain (CofE-like, EC 6.3.2.31) and the C-terminal  
2 DF<sub>420</sub> reductase domain (16). The  $\gamma$ -glutamyl ligase CofE finally decorates F<sub>420</sub>-O with a varying number  
3 of (oligo-) $\gamma$ -glutamate residues (17).

4 F<sub>420</sub> is not ubiquitous in prokaryotes, but it is associated with certain phyla (18, 19). First discovered in  
5 methanogenic archaea (20, 21), it was extensively studied as a potential drug target of pathogenic  
6 mycobacteria (10) or as a cofactor enabling antibiotics biosynthesis in streptomycetes (2). Genome  
7 sequencing revealed that some Gram-negative bacteria have acquired F<sub>420</sub> genes by horizontal transfer  
8 (19, 22). However, virtually nothing is known about the biosynthesis and role of F<sub>420</sub> in these organisms.  
9 By genome mining, we found a biosynthetic gene cluster (BGC) homologous to those previously  
10 implicated in the biosynthesis of F<sub>420</sub> in the endofungal bacterium *Paraburkholderia rhizoxinica* HKI 454  
11 (Figure 2A and Supporting Information Table S3). This organism is an intracellular endosymbiont of the  
12 phytopathogenic fungus *Rhizopus microsporus* supplying its host with antimitotic toxins that act as  
13 virulence factors during infection of rice plants (23-25). We hypothesized that genes from Gram-  
14 negative bacteria related to F<sub>420</sub> biosynthesis could facilitate F<sub>420</sub> production in *E. coli* or could reveal  
15 novel biosynthetic routes towards this valuable molecule. Therefore, we set out to investigate if the  
16 BGC is active and if it can be refactored to produce F<sub>420</sub> in *E. coli*.

17 Here, we show that *P. rhizoxinica* produces unexpected F<sub>420</sub>-derivatives (3PG-F<sub>420</sub>) both in symbiosis as  
18 well as in axenic culture. Heterologous expression and large-scale production in *E. coli* allowed for  
19 elucidation of their chemical structure. By comparative analyses, we discovered related metabolites in  
20 a biogas-producing microbial community, thus indicating their broader abundance and relevance.  
21 Enzyme assays showed that a switch in substrate specificity of CofC is responsible for the biosynthesis  
22 of 3PG-F<sub>420</sub> and proved that it can serve as a substitute for F<sub>420</sub> in biochemical reactions.

## 23 **Results and Discussion**

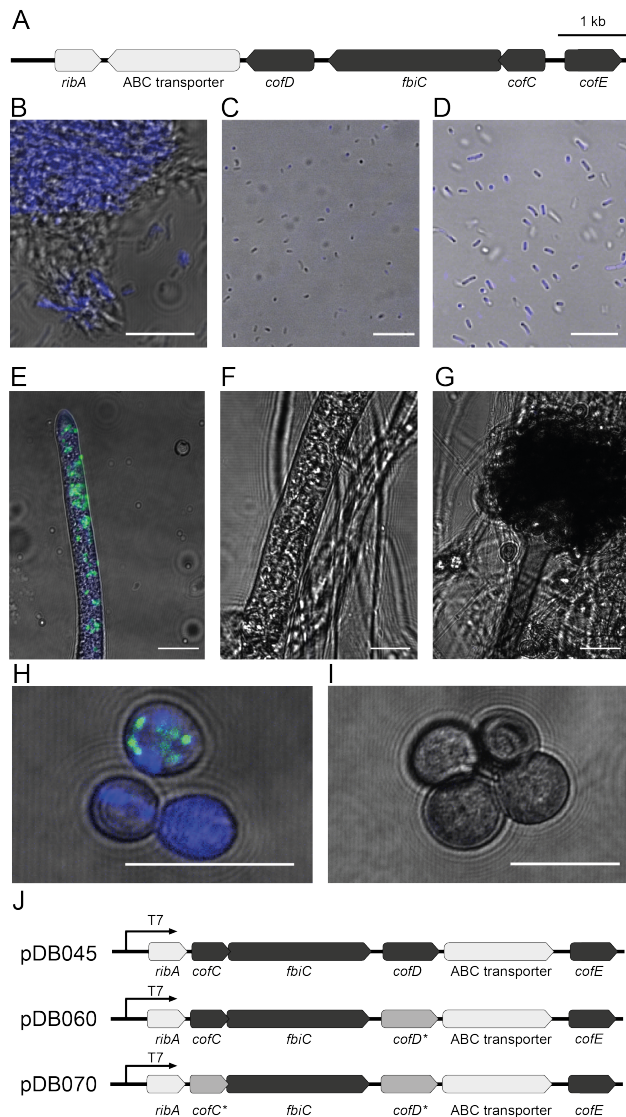

**Figure 2.** Deazaflavin biosynthesis in *P. rhizoxinica*. A) BGC of 3PG-F<sub>420</sub>. Core genes are shown in dark grey. B-I) Microscopy photographs depict fluorescence characteristic of deazaflavins in blue. B-D) axenic *M. smegmatis* (B), *P. rhizoxinica* (C), and *E. coli* / pDB045 (D). In *R. microsporus* ATCC 62417, deazaflavins are correlated to the presence of *P. rhizoxinica* symbionts (green, Syto9 staining) (E). No fluorescence was detected in cured ATCC 62417 mycelium (F) or in the naturally symbiont-free strain, CBS 344.29 (G). The same pattern was observed in spores of either wild-type ATCC 62417 (H) or CBS 344.29 (I). Scale bars represent 10  $\mu$ m. J) Refactored versions of the BGC and corresponding plasmids for heterologous expression in *E. coli*. Asterisks mark genes from *M. jannaschii*.

To test whether *P. rhizoxinica* is capable of producing deazaflavins, we investigated axenic cultures of symbiont (*P. rhizoxinica*) and host (*R. microsporus*) as well as symbiotic cultures by fluorescence microscopy (Figures 2B-I and Supporting Information Figures S1-4). Indeed, symbiotic *P. rhizoxinica* and the cytosol of colonized mycelia emitted strong fluorescence characteristic of deazaflavins. Notably, even fluorescence of bacteria present inside of fungal spores was observed. Axenic fungi, however, showed no fluorescence, whereas only low signals were measured from axenic bacteria under the same conditions. To corroborate the results obtained by microscopy, we extracted metabolites from axenic *P. rhizoxinica*, axenic *R. microsporus* as well as fungal host containing

1 endosymbionts and analyzed the extracts by LC-MS/MS. To our surprise, only  $F_0$  could be detected in  
2 axenic *P. rhizoxinica* and in the fungal host containing endosymbionts, but none of the expected  $F_{420}$ -  
3 n species.  
4 To further test the biosynthetic capacity of the full BGC, we refactored it to obtain a single operon  
5 under the control of a T7 promoter for heterologous expression yielding *E. coli*/pDB045 (Figure 2J).  
6 Examination of transformed bacteria by fluorescence microscopy revealed strong fluorescence as in  
7 the endofungal bacteria (Figure 2D), but LC-MS analyses again yielded only mass traces of  $F_0$  (mainly  
8 found in the culture supernatant), but not of  $F_{420}$ -n. Since the impeded production could be attributed  
9 to nonfunctional proteins, we analyzed proteins by SDS-PAGE and found that CofD was poorly soluble  
10 in *E. coli*. Replacement of the *cofD* gene with the corresponding *M. jannaschii* homolog (14) provided  
11 soluble protein (*E. coli*/pDB060), however, again no trace of  $F_{420}$  could be detected. Therefore, we  
12 reexamined the metabolome of *E. coli*/pDB045 for characteristic MS/MS fragments derived from the  
13  $F_0$  moiety ( $m/z$  230.06, 346.10, 364.11). Surprisingly, the analysis revealed spectra with a similar  
14 fragmentation pattern, yet derived from precursor ions that had a mass shift of 15.995 compared to  
15  $F_{420}$ , indicating the presence of an additional oxygen atom (Figures 3A-B and Supporting Information  
16 Figures 5-8). Further analyses revealed an (oligo-) $\gamma$ -glutamate series of the oxygenated compound  
17 suggesting these species are congeners. According to MS/MS fragmentation, the additional oxygen  
18 was present in the "phospholactyl" moiety of  $F_{420}$ -n thus forming a "phosphoglyceryl" moiety.  
19 Extensive 1D- and 2D-NMR experiments (Figure 3C and Supporting Information Section 2.2) and  
20 comparison to classical  $F_{420}$  (20) corroborated that this moiety corresponds to 3-phosphoglycerate (3-  
21 PG). Therefore, we named the molecules 3PG- $F_{420}$ . This finding was unexpected because 2-  
22 phosphoglycerate is structurally more similar to PEP and 2-PL than 3-PG. Chemical degradation  
23 followed by chiral UHPLC-MS finally substantiated that the additional stereocenter of 3PG- $F_{420}$  is *R*-  
24 configured (Figure 3D and Supporting Information Figure S51). Large-scale cultivation of *E. coli*/pDB045  
25 also revealed traces of dehydro- $F_{420}$  ( $DF_{420}$ ), but the yields were too low for NMR studies. The structure  
26 and occurrence of 3PG- $F_{420}$  has not been reported before. To date, the only known derivatives of  $F_{420}$ -  
27 n are factor  $F_{390}$ -A and  $F_{390}$ -G, 8-OH-AMP and 8-OH-GMP esters of  $F_{420}$ , respectively (26). In  
28 methanogens, they are formed reversibly, e.g., during oxygen exposure, acting as a reporter  
29 compound for hydrogen starvation (27). In contrast, the modifications seen in 3PG- $F_{420}$  are not  
30 temporary. Rather, 3PG- $F_{420}$  seems to replace  $F_{420}$  as a natural deazaflavin-cofactor in *P. rhizoxinica*. At  
31 least in this organism, it does not coexist with classical  $F_{420}$ . This situation is reminiscent of mycothiol,  
32 a specialized thiol cofactor that replaced glutathione in actinobacteria (28).  
33

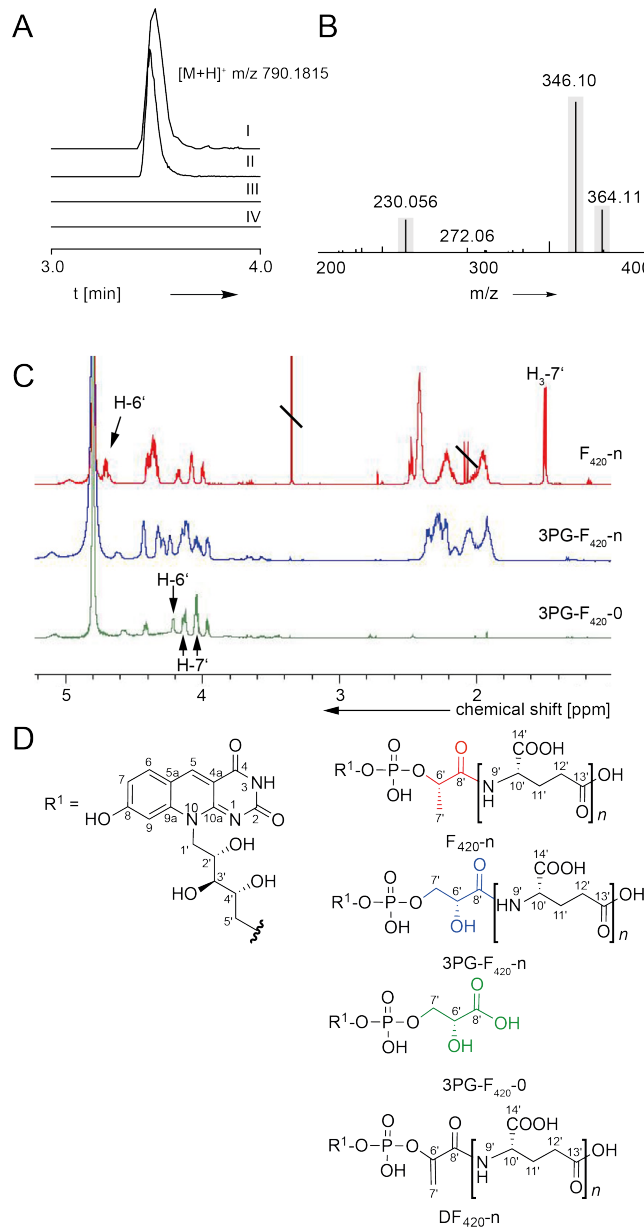

1  
2  
3  
4  
5  
6  
7  
8

**Figure 3.** Chemical analysis of 3PG- $F_{420}$ . A) Extracted ion chromatograms of 3PG- $F_{420-2}$  produced in *E. coli*. I: *E. coli* / pDB045, II: *cofD* exchanged by *M. jannaschii* homolog (pDB060), III: *cofD* and *cofC* exchanged by *M. jannaschii* homologs (pDB070) IV: empty vector (pETDuet). B) Excerpt of the MS/MS spectrum of 3PG- $F_{420-2}$ . Grey bars highlight  $m/z$  used for fragment ion search of  $F_{420}$  derivatives. C)  $^1H$  NMR comparison of  $F_{420-n}$  ( $D_2O$ ), 3PG- $F_{420-n}$  (0.1%  $ND_3$  in  $D_2O$ ) and 3PG- $F_{420-0}$  (0.1%  $ND_3$  in  $D_2O$ ) indicated the replacement of the lactyl moiety in  $F_{420}$  with a glyceryl moiety in 3PG- $F_{420}$ . D) Proposed structures of 3PG- $F_{420-0}$ , 3PG- $F_{420-n}$ , and  $DF_{420-n}$ .

9 To investigate if 3PG- $F_{420}$  is produced by wild-type *P. rhizoxinica*, we reanalyzed LC-MS data for the  
10 presence of corresponding mass signals. Indeed, 3PG- $F_{420}$  species were found in samples containing  
11 bacteria (axenic culture, symbiosis), but not in symbiont-free host mycelia (Supporting Information  
12 Figures S9-14). In extracts of *P. rhizoxinica*, no traces of  $F_{420}$  and  $DF_{420}$  were detected. The presence of  
13 3PG- $F_{420}$  was restricted to the cell pellet, whereas  $F_0$  was abundant in culture supernatants. We thus  
14 conclude that the fluorescence observed in bacterial cells of *P. rhizoxinica* is derived from 3PG- $F_{420}$  and

1 F<sub>0</sub>. So far, there is only preliminary evidence for the occurrence of deazaflavin cofactors in a few Gram-  
2 negative bacteria, e.g., *Oligotropha carboxidivorans* and *Paracoccus dentrificans* (19) as well as in the  
3 uncultured, but biosynthetically highly prolific 'Candidatus Entotheonella factor' (22). The exact  
4 structure and function of F<sub>420</sub> in most Gram-negative bacteria that harbor corresponding biosynthetic  
5 genes, however, is unknown. The fact that *P. rhizoxinica* produced 3PG-F<sub>420</sub> under symbiotic cultivation  
6 conditions allows for the conclusion that it provides a fitness benefit in its natural habitat. Notably,  
7 none of the well-characterized F<sub>420</sub>-dependent enzyme families (4, 18) are encoded in the *P. rhizoxinica*  
8 genome according to BLAST and conserved domains searches, not even any of the widespread  
9 regeneration systems like Fno or F<sub>420</sub>-dependent glucose-6-phosphate dehydrogenase. Therefore,  
10 future investigations of 3PG-F<sub>420</sub>-producing organisms are likely to reveal novel enzymes, regeneration  
11 systems, and cellular pathways depending on this cofactor.

12 To assess if 3PG-F<sub>420</sub> is restricted to fungal endosymbionts or if it might be more widespread in the  
13 environment, we examined *M. jannaschii* and *M. smegmatis* for the presence of any F<sub>420</sub> congeners.  
14 Only F<sub>420-n</sub> was found from extracts of *M. jannaschii*, while F<sub>420-n</sub> and DF<sub>420-n</sub> were detected in extracts  
15 of *M. smegmatis*. (Supporting Information Figures S15-16). None of the 3PG-F<sub>420</sub>-derivatives were  
16 found in the reference organisms. Since methanogens are a common source of F<sub>420</sub> in nature, we  
17 analyzed (two independent) sludge samples from a local biogas production plant. To our surprise,  
18 extraction of the microbial community present in the biogas-producing sludge followed by LC-MS/MS  
19 eluted, besides classical F<sub>420</sub>, a compound with identical retention time, exact mass and MS/MS  
20 fragmentation pattern as 3PG-F<sub>420</sub> (Supporting Information Figure S17). As fluorescence and UV-based  
21 detection does usually not resolve classical F<sub>420</sub> and 3PG-F<sub>420</sub>, these derivatives might have been  
22 misidentified as F<sub>420</sub> in the past. Since neither *P. rhizoxinica* nor its host *R. microsporus* are able to grow  
23 under anaerobic and thermophilic (temperatures >42 °C) conditions, they can be excluded as the  
24 source of these cofactors. The high complexity of biogas-producing microbiomes (29) do not allow for  
25 an educated guess of the producer, although methanogens would be reasonable candidates.

26 In order to rationalize how the biosynthetic pathway was redirected to form 3PG-F<sub>420</sub> instead of F<sub>420</sub>,  
27 we examined key steps of the biosynthesis more closely. We observed that production of 3PG-F<sub>420</sub> was  
28 not abolished by the exchange of *cofD* from *P. rhizoxinica* by *cofD* from *M. jannaschii* (plasmid  
29 pDB060). Hence, the phospholactyl transferase CofD could not be held accountable for the switch  
30 towards 3PG-F<sub>420</sub>. According to the existing biosynthetic model, the most plausible scenario was that  
31 CofC incorporated 3-phospho-D-glycerate (3-PG), an intermediate of glycolysis, instead of 2-PL to form  
32 3PG-F<sub>420-0</sub> and, to a minor extent, PEP to form DF<sub>420-0</sub>. To test this hypothesis, we exchanged *cofC* and  
33 *cofD* by the corresponding *M. jannaschii* homologs. The resulting strain *E. coli*/pDB070 (Figure 2J and  
34 Supporting Information Figure S18) produced neither 3PG-F<sub>420</sub> nor F<sub>420</sub> but traces of DF<sub>420</sub>. To further  
35 investigate the substrate specificity of CofC, we performed an in-vitro assay using CofC and CofD (13).



1 Genes *cofC* of *P. rhizoxinica* as well as *cofC* and *cofD* from *M. jannaschii* were cloned, corresponding  
 2 proteins produced as hexahistidine fusions in *E. coli* and purified by metal affinity chromatography for  
 3 in-vitro assays. The physiologically relevant isomers 2-phospho-D-glycerate (2-PG) and 3-phospho-D-  
 4 glycerate (3-PG), as well as PEP and 2-PL, served as substrates. Reaction products were monitored by  
 5 LC-MS. Indeed, when CofC from *P. rhizoxinica* was tested, the mass of 3PG-F<sub>420</sub>-0 appeared after  
 6 reaction with D-3-PG eluting at the same retention time as the in-vivo product (Supporting Information  
 7 Section 2.4). In addition, the formation of DF<sub>420</sub>-0 and F<sub>420</sub>-0 was detected, when the enzymes were  
 8 incubated with PEP and 2-PL, respectively. In contrast, reaction with 2-PG yielded mass signals close  
 9 to the noise level. Controls lacking CofC did not generate any of these products. In a direct substrate  
 10 competition assay (Figure 4A), 3-PG was found to be the preferred substrate with a relative turnover  
 11 of ca. 73% (2-PL: 23% PEP: 4%). This finding is in agreement with the structure of 3PG-F<sub>420</sub> and the  
 12 occurrence of DF<sub>420</sub> as a minor biosynthetic product in *E. coli*. Note that CofC from *M. jannaschii*  
 13 displayed a strong turnover of 2-PL (96.5%), weak turnover of PEP (3.5%) and no turnover of 3-PG. This  
 14 finding supports the notion that the CofC of *P. rhizoxinica* has undergone a substrate specificity switch  
 15 during evolution.

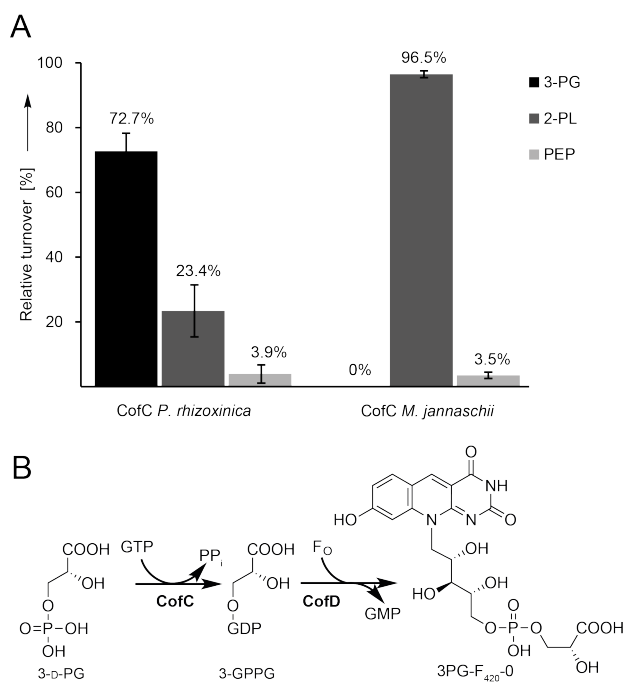

16 **Figure 4.** Combined CofC/D in-vitro assay. A) Relative turnover of substrates estimated from a substrate competition assays  
 17 (D-3-PG, 2-PL, and PEP). CofC from *P. rhizoxinica* accepted 3-PG (72.7%), 2-PL (23.4%), and PEP (3.9%). CofC from *M. jannaschii*  
 18 preferred 2-PL (96.5%), and PEP (3.5%). 3-PG was not turned over. CofD from *M. jannaschii* was used in all assays. Error bars  
 19 represent the standard deviation (SD) of three independent biological replicates (N=3). B) Proposed model of 3PG-F<sub>420</sub>  
 20 biosynthesis. 3-GPPG: 3-(guanosine-5'-disphospho)-D-glycerate.  
 21

22  
 23 Recently, Bashiri *et al.* claimed that PEP is the substrate of CofC in prokaryotes (15). Our results confirm  
 24 the hypothesis that PEP is the physiological substrate in mycobacteria, since we observed turnover of

1 PEP by all CofC homologs tested. However, in contrast to Bashiri *et al.*, 2-PL was the best substrate of  
 2 *M. jannaschii* CofC in our assay. Since Graupner and White detected significant amounts of 2-PL in  
 3 methanogenic archaea and observed the conversion of lactate into 2-PL by isotope labeling (30), we  
 4 conclude that 2-PL might still be a relevant substrate in archaea. From a phylogenetic perspective, our  
 5 results suggest that multiple metabolic re-wiring events occurred in the evolution of F<sub>420</sub> biosynthesis.  
 6 While actinobacteria evolved the DF<sub>420</sub> reductase (C-terminal domain of FbiB), archaea accomplished  
 7 to produce the (unusual) metabolite 2-PL. Other organisms, as exemplified by *P. rhizoxinca*, rerouted  
 8 the biosynthesis to the ubiquitous metabolite 3-PG.  
 9 To address the question if the  $\gamma$ -glutamyl ligase CofE adapted its substrate specificity to 3PG-F<sub>420</sub>, we  
 10 individually co-expressed *cofE* genes from *P. rhizoxinca*, *M. jannaschii* and *M. smegmatis* (*fbiB*)  
 11 together with a minimal BGC consisting of *fbiC*, *cofC*, and *cofD* in a two-plasmid system. Extraction of  
 12 metabolites and LC-MS/MS revealed that all three CofE homologs elongated 3PG-F<sub>420</sub>-0 to oligo-  
 13 glutamate chain lengths up to n=6 (Supporting Information Figures S63-65). Thus, we conclude that  
 14 CofE does not act as an additional specificity filter during chain elongation of 3PG-F<sub>420</sub>.

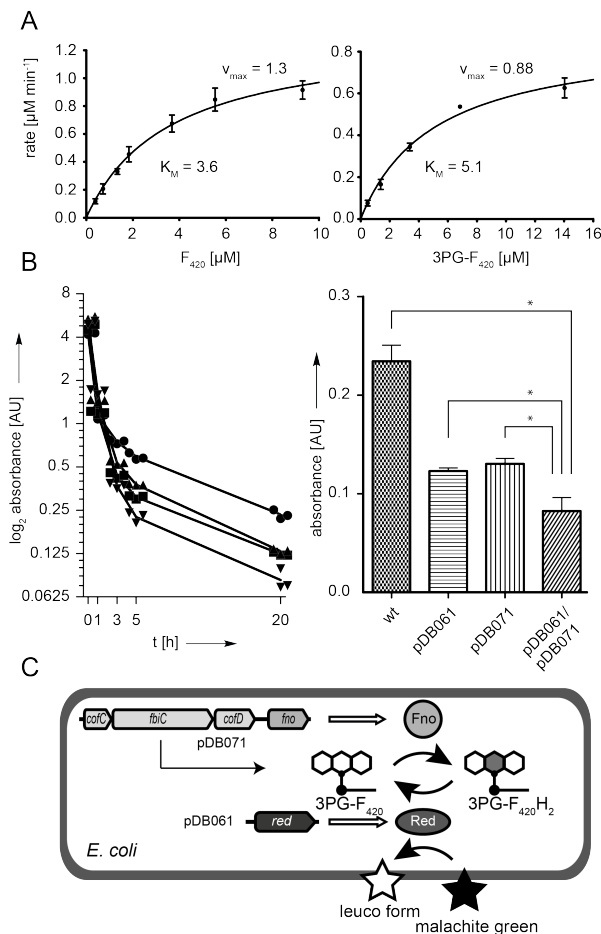

15  
 16 **Figure 5.** Cofactor function of 3PG-F<sub>420</sub>. A) Michaelis-Menten kinetics of Fno for F<sub>420</sub> (left) and 3PG-F<sub>420</sub> as substrates (right).  
 17 Three biological replicates were used to determine parameters.  $K_M$  for F<sub>420</sub> was  $3.6 \pm 0.7$  μM (standard error).  $K_M$  for 3PG-F<sub>420</sub>  
 18 was  $5.1 \pm 1.0$  μM. Error bars indicate standard deviation of replicates (N=3). B) In-vivo reduction of malachite green  
 19 (absorbance: 618 nm) by the F<sub>420</sub>-dependent reductase MSMEG\_5998. Fno was used to regenerate 3PG-F<sub>420</sub>H<sub>2</sub>. Left panel:

1 Time course of the malachite green depletion assay. Right panel: Bar chart of residual malachite green after 20 h: wt: *E. coli*  
2 BL21(DE3), pDB061: *E. coli* producing MSMEG\_5998, pDB071: *E. coli* producing 3PG-F<sub>420</sub>-O + Fno. Exact means ± SD of  
3 biological triplicates were 0.234 ± 0.017 (wt), 0.124 ± 0.003 (pDB061), 0.169 ± 0.011 (pDB071), and 0.082 ± 0.0139  
4 (pDB061/pDB071). An asterisk indicates statistical significance (one-way ANOVA, p<0.05, N=3). C) Engineered *E. coli*  
5 combining 3PG-F<sub>420</sub>, Fno and reductase MSMEG\_5998 (*red*) for reduction of malachite green.

6  
7 The successful isolation of 3PG-F<sub>420</sub> and reconstitution of its biosynthesis in *E. coli* motivated us to  
8 address the question of whether 3PG-F<sub>420</sub> could substitute F<sub>420</sub> in biocatalysis. To this end, we cloned  
9 a gene encoding Fno (F<sub>420</sub>:NADPH oxidoreductase), an enzyme that serves as a regeneration system  
10 for F<sub>420</sub>H<sub>2</sub> using NADPH/H<sup>+</sup> as an electron donor (31). We first examined if Fno can accept 3PG-F<sub>420</sub> as  
11 a substrate. Indeed, we observed an efficient reduction of 3PG-F<sub>420</sub> by recombinant Fno as mirrored by  
12 a rapid decrease of characteristic UV absorption. An examination of kinetic parameters (Figure 5A)  
13 revealed that the apparent K<sub>M</sub> of Fno for F<sub>420</sub> was 3.6 ± 0.7 μM. This value is similar to the reported K<sub>M</sub>  
14 of 10 μM (32). Under identical assay conditions, the K<sub>M</sub> for 3PG-F<sub>420</sub> was only slightly higher (5.1 ± 1.0  
15 μM). The v<sub>max</sub> values were in a similar range as well (F<sub>420</sub>: 1.3 ± 0.2 μM min<sup>-1</sup>; 3PG-F<sub>420</sub>: 0.88 ±  
16 0.07 μM min<sup>-1</sup>) pointing towards only a minor reduction of maximal turnover. Encouraged by the  
17 finding that 3PG-F<sub>420</sub> can substitute F<sub>420</sub>, we aimed at an in-vivo application of the cofactor for  
18 malachite green reduction as a proof of principle. To this end, we combined the *fno* gene with a  
19 minimal BGC producing 3PG-F<sub>420</sub>-O (Figure 5C and Supporting Information Figure S62) on a single vector  
20 (pDB071). Additionally, the F<sub>420</sub>-dependent malachite green reductase gene MSMEG\_5998 (33) from  
21 *M. smegmatis* was cloned and expressed from a compatible vector backbone (pDB061). Finally, co-  
22 expression of all components in *E. coli* yielded a strain (pDB061/pDB071) that was able to decolorize  
23 malachite green significantly faster than control strains expressing the reductase or the cofactor alone  
24 (Figure 5B). Thus, we conclude that 3PG-F<sub>420</sub> can substitute F<sub>420</sub> as a redox cofactor in this case. The  
25 production of classical F<sub>420</sub> and its use for biotransformations in *E. coli* has just recently been achieved  
26 in moderate yields using *Mycobacterium* genes including the DF<sub>420</sub> reductase domain (15).

27 In summary, we discovered a derivative of the redox cofactor F<sub>420</sub> that is produced by the Gram-  
28 negative endofungal bacterium *P. rhizoxinica*. We fully elucidated its chemical structure and show its  
29 potential cofactor function. Thus, our work is a solid basis to unveil unknown enzyme families and  
30 bioprocesses depending on 3PG-F<sub>420</sub>. Intriguingly, its presence in a biogas-producing digester suggests  
31 that the cofactor is more widespread in nature than expected. Furthermore, we could demonstrate  
32 that the guanylyltransferase CofC is responsible for the biosynthetic switch leading to the production  
33 of 3PG-F<sub>420</sub>. Our results thus significantly refine and extend the biosynthetic pathway models to  
34 deazaflavin cofactors in several phyla. Notably, the pathway discovered here, offered an alternative  
35 route to heterologous production and reconstitution of F<sub>420</sub>-dependent bioprocesses in *E. coli*. In  
36 recent years, there has been increasing interest in F<sub>420</sub>-dependent enzymes for biocatalysis (5, 6, 34,

1 35). Future applications will comprise for instance enantioselective biotransformations or the creation  
2 of a universal expression host for the production of antibiotics and other high-value compounds.

## 4 **Methods**

5 Materials and methods are summarized in Supporting Information (Section 1).

## 7 **Acknowledgments**

8 We thank Prof. Dr. Dina Grohmann and Dr. Ghader Bashiri for kindly providing *M. jannaschii* and  
9 *M. smegmatis* / *fbiABC*, respectively. We thank Biogas Jena GmbH and Co. KG for the kind donation of  
10 biogas plant samples. We thank Heike Heinecke for conducting NMR experiments. G.L. thanks the  
11 Deutsche Forschungsgemeinschaft (DFG Grant LA 4424/1-1) and the Carl Zeiss Foundation for funding.  
12 Financial support by the DFG (CRC 1127 ChemBioSys) to C.H. and C.B., and, BE-4799/2-1 to C.B., and  
13 Leibniz Award to C.H., by the ERC (MSCA-IF-EF-RI Project 794343, to I.R.) and the JSMC to Z.U. is  
14 gratefully acknowledged.

## 15 **References**

- 16 1. Jacobson F & Walsh C (1984) Properties of 7,8-didemethyl-8-hydroxy-5-deazaflavins relevant  
17 to redox coenzyme function in methanogen metabolism. *Biochemistry* 23(5):979-988.
- 18 2. Greening C, *et al.* (2016) Physiology, biochemistry, and applications of F<sub>420</sub><sup>-</sup> and F<sub>o</sub>-dependent  
19 redox reactions. *Microbiol Mol Biol Rev* 80(2):451-493.
- 20 3. Heiss G, *et al.* (2002) npd gene functions of *Rhodococcus (opacus) erythropolis* HL PM-1 in  
21 the initial steps of 2,4,6-trinitrophenol degradation. *Microbiology* 148(Pt 3):799-806.
- 22 4. Taylor MC, *et al.* (2010) Identification and characterization of two families of F<sub>420</sub>H<sub>2</sub><sup>-</sup>  
23 dependent reductases from Mycobacteria that catalyse aflatoxin degradation. *Mol Microbiol*  
24 78(3):561-575.
- 25 5. Taylor M, Scott C, & Grogan G (2013) F<sub>420</sub>-dependent enzymes - potential for applications in  
26 biotechnology. *Trends Biotechnol* 31(2):63-64.
- 27 6. Mathew S, Trajkovic M, Kumar H, Nguyen QT, & Fraaije MW (2018) Enantio- and  
28 regioselective ene-reductions using F<sub>420</sub>H<sub>2</sub><sup>-</sup>-dependent enzymes. *Chem Commun*  
29 54(79):11208-11211.
- 30 7. Wang P, Bashiri G, Gao X, Sawaya MR, & Tang Y (2013) Uncovering the enzymes that catalyze  
31 the final steps in oxytetracycline biosynthesis. *J Am Chem Soc* 135(19):7138-7141.
- 32 8. Li W, Khullar A, Chou S, Sacramo A, & Gerratana B (2009) Biosynthesis of sibiromycin, a  
33 potent antitumor antibiotic. *Appl Environ Microbiol* 75(9):2869-2878.
- 34 9. Ichikawa H, Bashiri G, & Kelly WL (2018) Biosynthesis of the thiopeptins and identification of  
35 an F<sub>420</sub>H<sub>2</sub><sup>-</sup>-dependent dehydropiperidine reductase. *J Am Chem Soc* 140(34):10749-10756.
- 36 10. Purwantini E & Mukhopadhyay B (2009) Conversion of NO<sub>2</sub> to NO by reduced coenzyme F420  
37 protects mycobacteria from nitrosative damage. *Proc Natl Acad Sci U S A* 106(15):6333-6338.
- 38 11. Singh R, *et al.* (2008) PA-824 kills nonreplicating *Mycobacterium tuberculosis* by intracellular  
39 NO release. *Science* 322(5906):1392-1395.
- 40 12. Decamps L, *et al.* (2012) Biosynthesis of F<sub>o</sub>, precursor of the F<sub>420</sub> cofactor, requires a unique  
41 two radical-SAM domain enzyme and tyrosine as substrate. *J Am Chem Soc* 134(44):18173-  
42 18176.

- 1 13. Grochowski LL, Xu H, & White RH (2008) Identification and characterization of the 2-  
2 phospho-L-lactate guanylyltransferase involved in coenzyme F<sub>420</sub> biosynthesis. *Biochemistry*  
3 47(9):3033-3037.
- 4 14. Graupner M, Xu H, & White RH (2002) Characterization of the 2-phospho-L-lactate  
5 transferase enzyme involved in coenzyme F(420) biosynthesis in *Methanococcus jannaschii*.  
6 *Biochemistry* 41(11):3754-3761.
- 7 15. Bashiri G, *et al.* (2019) A revised biosynthetic pathway for the cofactor F<sub>420</sub> in prokaryotes.  
8 *Nat Commun* 10(1):1558.
- 9 16. Bashiri G, *et al.* (2016) Elongation of the poly-gamma-glutamate tail of F<sub>420</sub> requires both  
10 domains of the F420:gamma-glutamyl ligase (FbiB) of *Mycobacterium tuberculosis*. *J Biol*  
11 *Chem* 291(13):6882-6894.
- 12 17. Li H, Graupner M, Xu H, & White RH (2003) CofE catalyzes the addition of two glutamates to  
13 F<sub>420</sub>-O in F<sub>420</sub> coenzyme biosynthesis in *Methanococcus jannaschii*. *Biochemistry* 42(32):9771-  
14 9778.
- 15 18. Selengut JD & Haft DH (2010) Unexpected abundance of coenzyme F(420)-dependent  
16 enzymes in *Mycobacterium tuberculosis* and other actinobacteria. *J Bacteriol* 192(21):5788-  
17 5798.
- 18 19. Ney B, *et al.* (2017) The methanogenic redox cofactor F<sub>420</sub> is widely synthesized by aerobic  
19 soil bacteria. *ISME J* 11(1):125-137.
- 20 20. Eirich LD, Vogels GD, & Wolfe RS (1978) Proposed structure for coenzyme F<sub>420</sub> from  
21 *Methanobacterium*. *Biochemistry* 17(22):4583-4593.
- 22 21. Cheeseman P, Toms-Wood A, & Wolfe RS (1972) Isolation and properties of a fluorescent  
23 compound, factor 420, from *Methanobacterium* strain M.o.H. *J Bacteriol* 112(1):527-531.
- 24 22. Lackner G, Peters EE, Helfrich EJ, & Piel J (2017) Insights into the lifestyle of uncultured  
25 bacterial natural product factories associated with marine sponges. *Proc Natl Acad Sci U S A*  
26 114(3):E347-E356.
- 27 23. Lackner G, Moebius N, Partida-Martinez LP, Boland S, & Hertweck C (2011) Evolution of an  
28 endofungal lifestyle: deductions from the *Burkholderia rhizoxinica* genome. *BMC Genomics*  
29 12:210.
- 30 24. Lackner G & Hertweck C (2011) Impact of endofungal bacteria on infection biology, food  
31 safety, and drug development. *PLoS Pathog* 7(6):e1002096.
- 32 25. Scherlach K, Busch B, Lackner G, Paszkowski U, & Hertweck C (2012) Symbiotic cooperation  
33 in the biosynthesis of a phytotoxin. *Angew Chem Int Ed Engl* 51(38):9615-9618.
- 34 26. Kiener A, Orme-Johnson WH, & Walsh CT (1988) Reversible conversion of coenzyme F<sub>420</sub> to  
35 the 8-OH-AMP and 8-OH-GMP esters, F<sub>390</sub>-A and F<sub>390</sub>-G, on oxygen exposure and  
36 reestablishment of anaerobiosis in *Methanobacterium thermoautotrophicum*. *Arch Microbiol*  
37 150(3):249-253.
- 38 27. Vermeij P, Pennings JL, Maassen SM, Keltjens JT, & Vogels GD (1997) Cellular levels of factor  
39 390 and methanogenic enzymes during growth of *Methanobacterium thermoautotrophicum*  
40 deltaH. *J Bacteriol* 179(21):6640-6648.
- 41 28. Newton GL, Buchmeier N, & Fahey RC (2008) Biosynthesis and functions of mycothiol, the  
42 unique protective thiol of Actinobacteria. *Microbiol Mol Biol Rev* 72(3):471-494.
- 43 29. Zhang L, Loh KC, Lim JW, & Zhang JX (2019) Bioinformatics analysis of metagenomics data of  
44 biogas-producing microbial communities in anaerobic digesters: A review. *Renew Sust Energ*  
45 *Rev* 100:110-126.
- 46 30. Graupner M & White RH (2001) Biosynthesis of the phosphodiester bond in coenzyme F(420)  
47 in the methanoarchaea. *Biochemistry* 40(36):10859-10872.
- 48 31. Warkentin E, *et al.* (2001) Structures of F<sub>420</sub>H<sub>2</sub> : NADP<sup>+</sup> oxidoreductase with and without its  
49 substrates bound. *Embo J* 20(23):6561-6569.
- 50 32. Kunow J, Schwörer B, Stetter KO, & Thauer RK (1993) A F(420)-dependent NADP reductase in  
51 the extremely thermophilic sulfate-reducing *Archaeoglobus fulgidus*. *Arch Microbiol*  
52 160(3):199-205.

- 1 33. Jirapanjawat T, *et al.* (2016) The redox cofactor F<sub>420</sub> protects mycobacteria from diverse  
2 antimicrobial compounds and mediates a reductive detoxification system. *Appl Environ*  
3 *Microbiol* 82(23):6810-6818.
- 4 34. Mascotti ML, Kumar H, Nguyen QT, Ayub MJ, & Fraaije MW (2018) Reconstructing the  
5 evolutionary history of F-420-dependent dehydrogenases. *Sci Rep* 8.
- 6 35. Kumar H, Nguyen QT, Binda C, Mattevi A, & Fraaije MW (2017) Isolation and characterization  
7 of a thermostable F<sub>420</sub>:NADPH oxidoreductase from *Thermobifida fusca*. *J Biol Chem*  
8 292(24):10123-10130.  
9
