# Supplementary material for: Metabolic pathway rerouting in Paraburkholderia rhizoxinica evolved long-overlooked derivatives of coenzyme F420
Source: bioRxiv or medRxiv preprint supplement (doi:10.1101/670455), 2019-07-26
Supplement: Supplementary file [file media-1.pdf]

# Supporting Information for

Metabolic pathway rerouting in *Paraburkholderia rhizoxinica* evolved long-overlooked derivatives of coenzyme F<sub>420</sub>.

Daniel Braga, Daniel Last, Mahmudul Hasan, Huijuan Guo, Daniel Lechnitz, Zerrin Uzum, Ingrid Richter, Felix Schalk, Christine Beemelmans, Christian Hertweck, and Gerald Lackner \*

\*Corresponding author:

Email: gerald.lackner@leibniz-hki.de

## **This PDF file includes:**

Supplementary text (see table of contents) including:

Figures S1 to S65

Tables S1 to S9

References for SI reference citations

## Table of contents:

|                                                                                                        |           |
|--------------------------------------------------------------------------------------------------------|-----------|
| <b>1. Material and methods</b>                                                                         | <b>3</b>  |
| 1.1. Chemicals, microorganisms, and synthetic DNA                                                      | 3         |
| 1.2. Microbial strains and cultivation conditions                                                      | 3         |
| 1.3. Fluorescence microscopy                                                                           | 3         |
| 1.4. Plasmid design and cloning                                                                        | 4         |
| 1.5. Heterologous expression of BGCs in <i>Escherichia coli</i>                                        | 5         |
| 1.6. Extraction of deazaflavins from bacteria and fungi (small scale)                                  | 5         |
| 1.7. UHPLC-MS analyses of deazaflavins                                                                 | 6         |
| 1.8. HPLC of F <sub>0</sub>                                                                            | 6         |
| 1.9. Large-scale production and purification of 3PG-F <sub>420</sub> and F <sub>420</sub>              | 7         |
| 1.10. Extraction of deazaflavins from a biogas-producing microbial community                           | 8         |
| 1.11. Acid hydrolysis of 3PG-F <sub>420</sub> and F <sub>420</sub> followed by chiral UPLC-MS analysis | 8         |
| 1.12. Nuclear magnetic resonance (NMR) spectroscopy                                                    | 9         |
| 1.13. Chemical synthesis of 2-phospho-L-lactate (2-PL)                                                 | 9         |
| 1.14. Heterologous production and purification of CofC and CofD                                        | 9         |
| 1.15. In-vitro CofC/CofD combined enzyme assay                                                         | 10        |
| 1.16. Heterologous production of Fno and enzymatic reduction of 3PG-F <sub>420</sub>                   | 10        |
| 1.17. In-vivo reduction of malachite green                                                             | 11        |
| 1.18. Fluorescence spectroscopy                                                                        | 11        |
| <b>2. Results</b>                                                                                      | <b>16</b> |
| 2.1. Fluorescence Microscopy                                                                           | 16        |
| 2.2. Detection of 3PG-F <sub>420</sub> by LC-MS/MS                                                     | 18        |
| 2.3. Structure elucidation of deazaflavins                                                             | 30        |
| 2.3.1. Structure elucidation of classical F <sub>420</sub> (control)                                   | 30        |
| 2.3.2. Structure elucidation of 3PG-F <sub>420-0</sub>                                                 | 43        |
| 2.3.3. Structure elucidation of 3PG-F <sub>420-n</sub>                                                 | 51        |
| 2.3.4. Determination of the absolute stereochemistry of 3PG-F <sub>420</sub>                           | 57        |
| 2.4. Combined CofC/D in-vitro enzyme assay                                                             | 59        |
| 2.5. Fno and malachite green reduction assays                                                          | 63        |
| 2.6. Plasmids sequences (Fasta format)                                                                 | 67        |
| <b>3. References</b>                                                                                   | <b>88</b> |

# 1 Material and methods

## 1.1 Chemicals, microorganisms, and synthetic DNA

Chemicals and media components were purchased from VWR, Roth, Sigma-Aldrich, Acros Organics and Alfa Aesar. All chemicals were of the highest purity available and the solvents were of mass spectrometry grade. Endonucleases and DNA polymerases were purchased from New England Biolabs. Synthetic genes (ThermoFisher Scientific, BioCat) were optimized for expression in *E. coli*.

## 1.2 Microbial strains and cultivation conditions

*Rhizopus microsporus* van Tieghem ATCC 62417 harboring *Paraburkholderia rhizoxinica* HKI 454 (former name: *Burkholderia rhizoxinica*) and naturally endosymbiont-free *Rhizopus microsporus* var. *chinensis* CBS 344.29 were used in this study. Endobacteria were eliminated from *R. microsporus* ATCC 62417 by antibiotic treatment as described (1). Bacterial symbionts were isolated from the mycelium of *R. microsporus* ATCC 62417 as previously reported (2). For F<sub>420</sub> extraction, *R. microsporus* strains were cultured in 100 mL of NB medium (Merck Millipore, Darmstadt, Germany) in 500 mL baffled Erlenmeyer flasks at 30 °C, 110 rpm for 7 days. Isolates of *P. rhizoxinica* were cultured in 50 mL MGY M9 medium (0.12% yeast extract, 1% glycerol, 40 mM K<sub>2</sub>HPO<sub>4</sub>, 14 mM KH<sub>2</sub>PO<sub>4</sub>, 2.2 mM sodium citrate, 7.5 mM (NH<sub>4</sub>)<sub>2</sub>SO<sub>4</sub>, and 0.8 mM Mg<sub>2</sub>SO<sub>4</sub>) in 300 mL baffled Erlenmeyer flasks at 30 °C, 110 rpm for 7 days. *E. coli* was routinely grown on lysogeny broth (LB, 10 g L<sup>-1</sup> tryptone, 5 g L<sup>-1</sup> yeast extract, 10 g L<sup>-1</sup> NaCl) at 37 °C and 210 rpm. *E. coli* BL21 (DE3) (New England Biolabs) was used for heterologous gene expression. *Mycolicibacterium* (former name: *Mycobacterium*) *smegmatis* was grown on LB supplemented with 0.05% (v/v) tween 80. Whenever used for the production of coenzyme F<sub>420</sub>, tween was substituted by sterile glass beads.

## 1.3 Fluorescence microscopy

To visualize the fluorescence of deazaflavins, *R. microsporus* ATCC 62417, cured *R. microsporus* ATCC 62417, symbiont-free *R. microsporus* CBS 344.29, *M. smegmatis* (3 days old), *E. coli* BL21(DE3)/pETDuet, *E. coli* BL21(DE3)/pDB045, and axenic *P. rhizoxinica* (7 days old) were analyzed using a Zeiss LSM 710 Confocal Laser Scanning Microscope (CLSM, Zeiss, Oberkochen, Germany) with excitation/emission of 405/470 nm. To visualize the localization of *P. rhizoxinica* within the fungal hyphae, a piece of fresh *R. microsporus* ATCC 62417 mycelium was transferred to an Eppendorf tube containing 200 µL physiological saline. The bacterial cells were stained with 5 µM Syto 9 green-fluorescent nucleic acid stain (Invitrogen, USA). The samples were incubated in the dark for 5 min and then analyzed using a Zeiss LSM 710 CLSM at 480/500 nm.

## 1.4 Plasmid design and cloning

Unless otherwise specified, cloning was based on DNA recombination following the Fast Cloning protocol (3). 50  $\mu$ L-polymerase chain reactions were composed by 0.2 mM each dNTP, 3 mM MgCl<sub>2</sub>, 0.2  $\mu$ M each primer (Table S2), as well as Q5 DNA Polymerase (1 U) and its respective buffer. PCRs started with initial denaturation at 98 °C for 1 minute followed by 18 cycles at 98 °C for 10 s, X °C for 30 s, and 72 °C for X' minutes. A final elongation at 72 °C for two minutes ended the reaction. Annealing temperatures varied with the primers and followed recommendations of the primer manufacturer. Elongation times were calculated as 2 kb per minute. All plasmids created during this study are listed in Table S3. Full plasmid sequences are provided in section 2.6.

The biosynthetic gene cluster for coenzyme F<sub>420</sub> from *P. rhizoxinica* HKI 454 (Table S1) was amplified from its genomic DNA and was cloned in two steps. First, *ribA* and *cofE* were individually amplified (primers oDB01 and oDB02, oDB05 and oDB06, respectively) and were assembled in pETDuet-1 (Merck) previously linearized with XbaI and BamHI. The resulting construct, pDB044 (6,840 bp), was generated from a tripartite assembly of the two genes and vector backbone using the infusion cloning kit (Takara Clontech). The gene sequences encoding CofC, the ABC transporter, and CofD were amplified as a single fragment (primers oDB07 and oDB08). pDB044 was PCR-linearized with the primers FC\_pDB044\_FP and FC\_pDB044\_RP to receive the latter amplicon. The construct bearing the complete gene cluster for 3PG-F<sub>420</sub> was termed pDB045 (13,135 bp).

Plasmid pDB045 served as the base to have either *P. rhizoxinica cofD* or both *cofC* and *cofD* swapped by *M. jannaschii* homologous gene sequences. The *cofD* gene (MJ\_RS06720) from *M. jannaschii* was obtained in the form of a gene string and amplified with the primers oDB023 and oDB024. pDB045 was amplified with the primers oDB021 and oDB022 in a manner the PCR product would lack *P. rhizoxinica cofD*. The resulting construct (pDB060, 13,045 bp), therefore, bore the BGC for F<sub>420</sub> with *P. rhizoxinica cofD* replaced by that from *M. jannaschi*. The same strategy was used to exchange *cofC*. This gene from *M. jannaschii* (MJ\_0887) was also purchased as a gene string and amplified with the primers oDB128 and oDB069. pDB060 served as template for the amplification/linearization of the plasmid lacking *P. rhizoxinica cofC* using the primers oDB070 and oDB071. The construct obtained (pDB070, 13,136 bp) has, therefore, the BGC for F<sub>420</sub> from *P. rhizoxinica* with the genes *cofC* and *cofD* replaced by the homologs from *M. jannaschii*. To construct plasmids encoding F<sub>420</sub>-dependent enzymes, the gene encoding F<sub>420</sub>-dependent malachite green reductase (MSMEG\_5998) was ordered as a gene string. The sequence was amplified (primers DB\_FP\_MBP\_5998 and DB\_RP\_MBP\_5998) and cloned in pMAL-c2x (New England Biolabs) linearized with the primers DB\_FP\_pMal-c2X and DB\_RP\_pMal-c2X. The resulting construct was termed pDB061 (7,155 bp). For Fno production (F<sub>420</sub>:NADPH oxidoreductase from *Archaeoglobus fulgidus*), the codon-optimized *fno* gene string (Fno, AFULGI\_RS04660) was amplified by PCR (primers: FC\_fno\_ins\_fw, FC\_fno\_ins\_rv) and ligated to

the pET28a backbone (primers: FC\_fno\_vec\_fw, FC\_fno\_vec\_rv) by Fast Cloning yielding plasmid pDL008. Plasmids intended to yield reduced 3PG-F<sub>420</sub> were built with the pCDFDuet-1 backbone (Merck) and bore the codon-optimized sequence of *fno* in the multiple cloning site (MCS) 1. The optimized *fno* sequence was amplified with the primers oDB084 and oDB122. The vector was linearized with the primers oDB081 and oDB123. FastCloning of both fragments yielded pDB065 (4,385 bp), which served as the vector to receive the gene sequence(s) from *P. rhizoxinica* encoding proteins for the production of deazaflavins in its MCS2. pDB065 was linearized with primers oDB105 and oDB106 to receive the trio *cofC*, *fbiC*, and *cofD*, amplified with primers oDB107 and oDB108. The construct was intended to yield reduced 3PG-F<sub>420</sub>-0 (pDB071, 8,656 bp). For heterologous expression of *cofC* and *cofD*, *cofC* (*P. rhizoxinica*) was amplified by PCR using primers CofC-fw and CofC-rv from genomic DNA. The vector backbone of pACYCDuet was amplified using primers pACYCDuet-fw and pACYCDuet-rv. Both PCR products were joined by FastCloning yielding plasmid pFS03 encoding an N-terminal hexahistidine (His<sub>6</sub>) fusion protein of CofC. The coding sequence of *cofD* (*M. jannaschii*) was obtained as synthetic gene string and PCR amplified using primers CofD-fw and CofD-rv. The backbone of pET28a was amplified by primers pET28a-fw and pET28a-rv and ligated with the insert by FastCloning yielding plasmid pFS04 encoding an N-terminal hexahistidine (His<sub>6</sub>) fusion protein His<sub>6</sub>-CofD. For coexpression with *cofE* homologs, a minimal cluster containing *cofC*, *fbiC* and *cofD* from pDB045 was amplified using primers oDB115 and oDB129B. oDB081 and oDB123 primers were used to amplify vector pCDFDuet-1 resulting in plasmid pMH02 (8,085 bp). *CofE* from *Methanocaldococcus jannaschii* was obtained as synthetic gene cloned into pET28a between BamHI and HindIII sites. *FbiB* was obtained as codon-optimized string and amplified by primers *fbiB\_fw* and *fbiB\_rv*, *cofE* from *Paraburkholderia rhizoxinica* was amplified using primers *cofE\_fw* and *cofE\_rv*. Both PCR products were fast-cloned into pET28a (amplified by primers pET28a-fw and pET28a-rv). All *cofE* constructs were designed in frame with the N-terminal His<sub>6</sub>-tag.

### 1.5 Heterologous expression of BGCs in *Escherichia coli*

For the heterologous expression of the biosynthetic gene clusters, *E. coli* BL21 (DE3) transformed, e.g. with plasmid pDB045 was grown to saturation in LB (50 µg mL<sup>-1</sup> carbenicillin) at 37 °C and 210 rpm. An overnight pre-culture was used (1:100) to inoculate 200 mL of main culture and induced with 200 µM IPTG upon OD<sub>600</sub> of 0.7. Protein and metabolite production proceeded for additional 20 h in the same culture conditions.

## 1.6 Extraction of deazaflavins from bacteria and fungi (small scale)

Metabolite extraction for both *E. coli* and *M. smegmatis* followed the same protocol: The biomass was pelleted by centrifugation (4 °C, 8,000 × g, 25 min), washed with dH<sub>2</sub>O, suspended in -20°C MeOH (MeOH) and left in an ultrasonic homogenizer for 10 minutes. Cell debris was removed by centrifugation. The extract was collected and the solvent was removed by rotary evaporation. The dried extract was dissolved in 500 µl MeOH. If the produced deazaflavin(s) were to be used in an enzymatic assay, the dried extract was dissolved in ddH<sub>2</sub>O and subsequently loaded onto a C18 Chromabond cartridge (Macherey-Nagel). Samples were washed and eluted with 20% and 30% (v/v) MeOH:H<sub>2</sub>O, respectively. Except for the steps of cell washing and lysis, solvent systems were acidified with 0.1% formic acid (v/v). Mycelium of *R. microsporus* was strained and resuspended in 10 mL ice-cold HPLC-grade MeOH (VWR Chemicals, Darmstadt, Germany), while *P. rhizoxinica* cultures were snap-frozen in liquid nitrogen and freeze-dried. Dry *P. rhizoxinica* cultures were then resuspended in 10 mL ice-cold MeOH. Samples were sonicated for 20 min (Sonorex RK100 Ultrasonic bath, Bandelin) and then shaken (250 rpm) for 1 h followed by centrifugation (10,000 rpm) for 15 min. The supernatant was filtered through a paper filter and the solvent was evaporated. Dry extracts were dissolved in 2 mL H<sub>2</sub>O.

## 1.7 UHPLC-MS analyses of deazaflavins

Ultra-high performance liquid chromatography coupled with mass spectrometry (UHPLC-HRMS) was performed on a Dionex Ultimate3000 system combined with a Q-Exactive Plus mass spectrometer (Thermo Scientific) with a heated electrospray ion source (HESI). Samples were separated by reverse-phase chromatography in a Luna Omega C18 column (100 x 2.1 mm, 1.6 µm, 100 Å, Phenomenex). H<sub>2</sub>O (A) or acetonitrile (B), both acidified with formic acid 0.1% (v/v), served as mobile phases. 5 µl of the bacterial extracts were submitted to a gradient as follows: 0 min, 5% B; 1 min, 15% B; 3 min, 25% B; 6 min, 40% B; 7-9 min, 97% B; 10 min, 5% B at a constant flow rate of 300 µL min<sup>-1</sup> and at 40 °C. The chromatographic eluent was ionized in positive mode. The MS was carried out within a range of m/z 350 – 1800 followed by a data-dependent MS<sup>2</sup> analysis. MS<sup>1</sup> measurements were set to a resolving power of 70,000, MS<sup>2</sup> experiments to 17,500 at m/z 200, isolation windows m/z 1.0, normalized collision energy (NCE) 30.

## 1.8 HPLC of F<sub>O</sub>

The purification of F<sub>O</sub> for subsequent biochemical assays was carried out by analytical HPLC on a Shimadzu system equipped with a Nucleodur 100-5 C8ec column (150 x 4.6 mm, 5 µm, 300 Å, Macherey-Nagel). Solvents were the same as described for LC-HRMS. 20 µl of the SPE-purified samples were submitted to a gradient as follows: 0-2.5 min, 15% B; 5 min, 22% B; 6-11 min, 99% B;

11.5-16.5 min, 15% B. Flow rate and column temperature were held constant at 1 mL min<sup>-1</sup> and 25 °C, respectively. Compounds were analyzed by a diode array- and a fluorescence detector arranged in tandem. Excitation and emission at 420 and 480 nm, respectively, were set up for the fluorescence-based detection.

### 1.9 Large-scale production and purification of 3PG-F<sub>420</sub> and F<sub>420</sub>

3PG-F<sub>420</sub> was produced from a total volume of 50 L of *E. coli* BL21 (DE3)/pDB045 grown in LB medium (100 µg/mL carbenicillin) in 2L flasks in several batches. At an OD<sub>600nm</sub> of 0.6, IPTG was added (0.2 mM) followed by 20 h of further incubation at 37 °C and 160 rpm. *E. coli* cells were harvested in batches by centrifugation (30 min at 3,100 × g), washed with Tris-HCl buffer (25mM, pH 7.4) and stored temporarily at -20°C. Combined *E. coli* pellets (213 g wet weight) were resuspended in Tris-HCl buffer (50 mM, 100 mM NaCl, pH 7.4), to a concentration of about 0.5 g/mL (wet weight). Subsequently, the suspensions were autoclaved for 15 min at 121°C to release 3PG-F<sub>420</sub>. Extracts were centrifuged for 30 min at 3,100 × g, supernatants were further processed. To generate 3PG-F<sub>420</sub>-0, the 3PG-F<sub>420</sub> species were digested by the addition of carboxypeptidase G from *Pseudomonas* sp. (5 units, Sigma-Aldrich) and zinc sulfate (0.2 mM final concentration), and subsequent incubation for 18 hours at 37 °C and 180 rpm. The reaction product was acidified to pH 3.5 with HCl and applied to Chromabond C18 SPE cartridge (10 g, Macherey-Nagel). Step-wise elution was performed with increasing shares of MeOH in H<sub>2</sub>O containing 0.25% formic acid. Fluorescence measurements of 1:50 diluted samples in sodium phosphate buffer (50 mM, pH 7.5) with FLUOstar Omega (BMG Labtech) indicated positive fractions. Solvent was evaporated to dryness under reduced pressure in a rotary evaporator. The residues were dissolved in sodium phosphate buffer (25 mM, pH 7.4). Next, anion-exchange chromatography of 3PG-F<sub>420</sub> was performed on a FPLC system (NGC Quest, Bio-Rad) equipped with a HiPrep QFF column (GE Healthcare) pre-equilibrated with sodium phosphate buffer (25 mM, pH 7.4). After loading, the column was subsequently washed with ten column volumes (CV) of the same buffer. Elution of 3PG-F<sub>420</sub> was achieved by a NaCl gradient during the elution phase: 0-2 CV: 0-150 mM NaCl, 2-18 CV: 150-700 mM NaCl, 18-20 CV: 700-1000 mM NaCl and monitored by UV/VIS absorption at 420 nm. Retention time depended on the length of the glutamic acid tail, e. g., 5-7 ≥ 450 mM NaCl. Fractions with absorption at 420 nm were applied to C18 SPE cartridges as described above. Finally, the desalted 3PG-F<sub>420</sub>-0 containing FPLC fractions (A19–A22) were submitted to a semi-preparative HPLC equipped with a Phenomenex Luna C8(2) 250 mm × 10 mm to yield 3PG-F<sub>420</sub>-0 (golden yellow solid, 2.62 mg, *t*<sub>R</sub> = 13.27 min) using the following gradient: 0–5 min, 20% B; 5–25 min, 20%–100% B; 25–30 min, 100% B (A: ddH<sub>2</sub>O + 0.1% formic acid; B: MeCN) with a flow rate of 2.0 mL/min. The desalted 3PG-F<sub>420</sub>-n containing FPLC fractions (A28–B9) were submitted to semi-

preparative HPLC equipped with a Phenomenex Luna C8(2) 250mm × 10 mm to yield 3PG-F<sub>420</sub>-n (3.96 mg,  $t_R = 15.03$  min) using the following gradient: 0–5 min, 20% B; 5–20 min, 20%–60% B; 20–25 min, 60%–100% B; 25–30 min, 100% B (A: dd H<sub>2</sub>O + 0.1% formic acid; B: MeCN) with a flow rate of 2.0 mL/min.

Classical F<sub>420</sub> was produced in *M. smegmatis* mc<sup>2</sup>4517 pYUBDuet-fbiABC as described previously (4). At the end of the cultivations, cells were washed with sodium phosphate buffer (25 mM, pH 7.4). *M. smegmatis* cells (135 g wet weight) were resuspended in sodium phosphate buffer (25 mM, pH 7.4), to about 0.5 g/mL. Subsequently, the suspensions were autoclaved for 15 min at 121°C. Extracts were centrifuged for 30 min at 3,100 x g, the supernatants were further processed.

Anion-exchange purification of F<sub>420</sub> was performed as described above. Fractions with absorption at 420 nm were applied to C18 SPE cartridges as described above. At this step, for instance, the purity of F<sub>420</sub>-5-7 eluting at 30% MeOH was already estimated by NMR to be  $\geq 95\%$ .

### 1.10 Extraction of deazaflavins from a biogas-producing microbial community

Samples were kindly provided by the Biogas Jena GmbH & Co. KG (Jena, Germany) two times and with an interval of three months. The substrates of the fermenters are about 30% goat manure and 70% mixed plant residues. Fermenting conditions are anaerobic at temperatures over 42 °C. For extraction of metabolites, 500 mL of MeOH was added to 65 g of the liquid portion of the sludge. The suspension was kept in an ultrasonic homogenizer for 30 minutes and stirred for another three hours followed by filtration through several paper filters and solvent evaporation to dryness under reduced pressure. The remaining solid (300 mg) was resuspended in 50 mL H<sub>2</sub>O containing 0.25% formic acid. Subsequently, deazaflavins were SPE-purified as described above on a 10 g Chromabond C18 cartridge (Macherey-Nagel). As high amounts of unknown polymers interfered with LC-MS analyses, these were almost entirely removed by upstream HPLC purification similar to the description of analytical HPLC in section 1.7.

### 1.11 Acid hydrolysis of 3PG-F<sub>420</sub> and F<sub>420</sub> followed by chiral UPLC-MS analysis

3PG-F<sub>420</sub>-0 (**5**, 1.45 mg yellow solid) was dissolved in 100  $\mu$ L HCl (1 M) and kept at 100 °C for 12 h. Afterwards, the reaction was neutralized by NaOH (1 M), centrifuged, and submitted to chiral UHPLC-MS on a Shimadzu LCMS-2020 system (single quadrupole) using an Astec CHIROBIOTIC R (10 cm x 4.6 mm, 5  $\mu$ m, Sigma) column at 40 °C. Scan range of the MS was set to  $m/z$  70 to 1,000 with a scan speed of 5,000 u/s and event time of 0.25 s under positive and negative mode. DL temperature was set to 250 °C with an interface temperature of 350 °C and a heat block of 400 °C. The nebulizing gas flow was set to 1.5 L/min and dry gas flow to 15 L/min. UPLC-MS analysis was conducted using an isocratic



condition: 0–16 min, 15% A/85% B (A: dd H<sub>2</sub>O with 33.3 mM NH<sub>4</sub>OAc; B: MeCN) with a flow rate of 0.7 mL/min under negative selected ion monitor (SIM) mode to detect the *m/z* 105.3 (M–H)<sup>+</sup>.

### 1.12 Nuclear magnetic resonance (NMR) spectroscopy

All measurements were performed on a Bruker AVANCE II 300 MHz and 600 MHz spectrometer equipped with a Bruker Cryoplatfom. The chemical shifts are reported in parts per million (ppm) relative to the solvent residual peak of D<sub>2</sub>O (<sup>1</sup>H: 4.79 ppm, singlet) and DMSO-*d*<sub>6</sub> (<sup>1</sup>H: 2.50 ppm, quintet; <sup>13</sup>C: 39.52 ppm, heptet).

### 1.13 Chemical synthesis of 2-phospho-lactate (2-PL)

Synthesis was performed as described in the literature (5). To a solution of benzyl (*S*)-2-hydroxypropanoate (750 mg, 4.16 mmol) in pyridine (5.55 mL) was dropped at 0°C diphenyl phosphoryl chloride (905 μL, 4.37 mmol, 1.05 equiv.) and the suspension was stirred at 25 °C for 24 h. The reaction was stopped by addition of H<sub>2</sub>O (1 mL) and the volatiles removed *in vacuo*. The residue was dissolved in toluene (7 mL) and washed with H<sub>2</sub>O, 1 M aq. HCl, sat. NaHCO<sub>3</sub>-solution and brine successively. The organic phase was dried over MgSO<sub>4</sub>, filtered and the volatiles removed *in vacuo* to yield 1.54 g of colorless oil, which was directly used in the next step. The oil was dissolved in EtOH (41.7 mL) and PtO<sub>2</sub> (82.6 mg, 636 μmol) was added. Hydrogen gas from a balloon was bubbled through the stirred black suspension for 3 h, then the mixture was left stirring under hydrogen atmosphere for additional 22 h with renewal of the atmosphere, when the balloon was depleted. After filtration of the mixture through a pad of Celite the volatiles were removed *in vacuo* to yield a greenish highly viscous oil. 2-PL was further purified via Chromabond C18 SPE cartridge (Macherey-Nagel). The flow-through was lyophilized and yielded 629 mg of 2-PL as colorless oil (47% yield over two steps). The analytical data was consistent with the literature.

<sup>1</sup>H NMR (300 MHz, D<sub>2</sub>O) δ 4.71 (dq, *J* = 7.5, 6.9 Hz, 1H, 2-H), 1.44 (t, *J* = 6.9 Hz, 3H, 3-H) ppm.

<sup>13</sup>C NMR (75 MHz, D<sub>2</sub>O) δ 175.6 (d, C-1), 70.6 (dd, C-2), 18.8 (dq, C-3) ppm.

### 1.14 Heterologous production and purification of CofC and CofD

*E. coli* BL21 (DE3) was individually transformed with pFS03 (encoding His<sub>6</sub>-CofC from *P. rhizoxinica*) or pFS04 (His<sub>6</sub>-CofD from *M. jannaschii*). A culture of 100 mL (50 μg/mL kanamycin or 25 μg/mL chloramphenicol) was grown at 37 °C and 180 rpm until OD<sub>600</sub> = 0.7 and induced with 1 mM isopropyl β-D-1-thiogalactopyranoside (IPTG). Protein production followed for 20 h at 17 °C and 180 rpm. Harvesting and purification steps of proteins were conducted at 4 °C. Cells were pelleted for 25 min at 8000 × *g* and suspended in lysis buffer (NaH<sub>2</sub>PO<sub>4</sub> 50 mM and NaCl 300 mM, 20 mM imidazole). Pulsed sonication was applied for 60 s with 10 s pause to lyse cells (SONOPLUS Ultrasound-

Homogenizer HD 2070, BANDELIN). Cell debris was separated by centrifugation for 30 min at  $11000 \times g$  and the hexa-histidine fusion proteins were purified from the supernatant by metal-affinity chromatography (HisPur™ Ni-NTA Resin column, Thermo Scientific) using lysis buffer with increasing concentration of imidazole (elution by 500 mM imidazole). Re-buffering of proteins was performed in a PD10 column (Sephadex™ G-25 M, GE Healthcare).

### 1.15 In-vitro CofC/CofD combined enzyme assay

Enzyme assays combining CofC and CofD to assess their substrate specificity were performed analogously to Grochowski *et al.* (6) and product formation of F<sub>420</sub>-0 derivatives was monitored by LC-MS. Reactions were carried in 50  $\mu$ l-reaction mixtures of 100 mM HEPES buffer (pH 7.4), 2 mM GTP, 2 mM MgCl<sub>2</sub>, 50 ng Fo (0.14 nM), 34  $\mu$ M CofD (WP\_010870769), and 0.5 mM of substrates (either 3-phospho-D-glyceric acid, 2-phospho-D-glyceric acid, phosphoenolpyruvic acid or 2-phospho-L-lactate). The reactions were initiated upon addition of 26  $\mu$ M CofC (WP\_013435883). For the competition assay, several substrates were used at the same time. Reactions were stopped after 0, 20, 40 and 60 min to monitor the rate of product formation. All reactions were carried out at 37 °C and 300 rpm. Reactions were quenched by addition of one volume of acetonitrile and 10  $\mu$ l of formic acid (20 %) and centrifuged at  $13000 \times g$  for 30 minutes to pellet precipitates. Supernatants were analyzed by LC-MS. The LC method was the same as stated using a Luna® Omega 1.6  $\mu$ m C18 100 Å and size of 100 x 2.1 mm (Phenomenex®). ESI-MS analysis was performed with a resolution of 70,000 and restricted to a mass range of 350 to 600 m/z to enhance sensitivity. Individual XICs ([M+H]<sup>+</sup>) were extracted from raw LC/MS data (3PG-F<sub>420</sub>-0: m/z 532.09364-532.09896, F<sub>420</sub>-0: m/z 516.09881-516.10397, DF<sub>420</sub>-0: m/z 514.08317-514.08831). Quantification was achieved by integration of specific extracted ion chromatograms (XICs). Area under curve (AUC) for each product was then normalized to the area corresponding to F<sub>0</sub> at time point zero. The normalized area was plotted over time and slopes of product formation were determined from the near-linear time range of the assay (20 min to 40 min) to mirror substrate turnover. Relative percentages of substrate turnover were calculated, their mean and standard deviation (SD) were derived from three independent biological replicates (N=3). Error bars of bar charts represent the SD.

### 16 Heterologous production of Fno and enzymatic reduction of 3PG-F<sub>420</sub> (kinetics)

For Fno production, *E. coli* BL21 (DE3) / pDL008 was grown in 150 mL of LB added with kanamycin (50  $\mu$ g/mL) at 37 °C and 180 rpm to an OD<sub>600</sub> of 0.45. Induction with 1 mM IPTG was followed by 20 h of further incubation at 20 °C and 180 rpm. The pellet was washed with 20 mL potassium phosphate buffer (1.5 M, pH 8.0), resuspended in 5 mL of the same buffer and lysed on ice by 3 cycles

of 1 min sonication (SONOPLUS Ultrasound-Homogenizer HD 2070, BANDELIN) with 30 s between each cycle. After centrifugation (15 min at  $3,100 \times g$ ), the supernatant was incubated for 30 min at  $90^\circ\text{C}$  to denature most host proteins. This was followed by another centrifugation step (15 min at  $3,100 \times g$ ) and one-to-four dilution with sodium phosphate buffer (50 mM, pH 7.5, 300 mM NaCl, 20 mM imidazole). Subsequently, metal-affinity chromatography (HisPur<sup>TM</sup> Ni-NTA Resin column, Thermo Scientific) was performed. After sample loading, the column was washed with two column volumes of the same buffer. Elution of the protein was achieved with buffer containing 500 mM imidazole. Finally, the buffer was exchanged to 1 mL potassium phosphate buffer (50 mM, pH 6) via centrifugal filtration (10 kDa cut-off). Fno-mediated turnover of oxidized 3PG-F<sub>420</sub> (absorbing at 400 nm,  $\epsilon_{400}=25.7 \text{ mM}^{-1} \text{ cm}^{-1}$ ) to reduced 3PG-F<sub>420</sub>H<sub>2</sub> (non-absorbing) was measured by FLUOstar Omega reader (BMG Labtech). The assay contained 0-14  $\mu\text{M}$  3PG-F<sub>420</sub> or 0-9.3  $\mu\text{M}$  F<sub>420</sub>, 250  $\mu\text{M}$  NADPH and 0.149  $\mu\text{g/mL}$  Fno in potassium phosphate buffer (50 mM, pH 6). Initial reaction rates were obtained by linear regression and plotted against 3PG-F<sub>420</sub> or F<sub>420</sub> concentrations. Three biological replicates (N=3) were measured and combined in one analysis. Michaelis-Menten parameters ( $v_{\text{max}}$  and  $K_{\text{M}}$  and corresponding standard errors) were obtained by nonlinear regression using SigmaPlot 12 with Enzyme Kinetics Wizard. Error bars show the standard deviation of the initial reaction speeds of the three replicates.

### 1.17 In-vivo reduction of malachite green

*E. coli* BL21 (DE3) transformed with pDB061, pDB071, or a combination of both was cultivated overnight as detailed. At this moment, gene expression was induced with 200  $\mu\text{M}$  IPTG and the cultivation received 50  $\text{mg L}^{-1}$  malachite green as described in the literature (7). 1-mL aliquots were centrifuged and UV absorbance at 618 nm of supernatants was measured. The reduction of malachite green to leucomalachite green was indicated by the reduction of absorbance over time. Values were recorded from three independent experiments. All data represent mean  $\pm$  SD. Statistical comparison was performed in GraphPad Prism version 5.0 for Windows by using one-way analysis of variance (ANOVA) followed by Tukey's multiple comparison test. The value of  $p < 0.05$  was considered statistically significant.

### 1.18 Fluorescence spectroscopy

Purified 3PG-F<sub>420</sub> and F<sub>420</sub> were dissolved in sodium phosphate buffer (50 mM, pH 7.5). Fluorescence spectra were recorded in a CLARIOstar reader (BMG Labtech).

**Table S1:** The 3PG-F<sub>420</sub> biosynthetic gene cluster from *P. rhizoxinica* HKI454 (GenBank accession number: NC\_014722).

| Gene | Locus_tag    | Proposed function                                          |
|------|--------------|------------------------------------------------------------|
| ribA | RBRH_RS08950 | GTP cyclohydrolase II                                      |
|      | RBRH_RS08955 | ABC transporter                                            |
| cofD | RBRH_RS08960 | 2-phospho-L-lactate transferase                            |
| fbiC | RBRH_RS08965 | FO synthase                                                |
| cofC | RBRH_RS08970 | 2-phospho-L-lactate guanylyltransferas                     |
| cofE | RBRH_RS08970 | coenzyme F <sub>420</sub> -0: $\gamma$ -L-glutamate ligase |

**Table S2.** Primers used in this study (nucleotide sequences).

| Name           | 5' - 3' sequences                               |
|----------------|-------------------------------------------------|
| cofC - fw      | AGGTCGACAAGCTTGCGATGTCTCCTGTTTCTGTCGC           |
| cofC - re      | CTTAAGCATTATGCGGCCTAGATTGGCATAGCACCT            |
| cofD - fw      | AAATGGGTCGCGGATCCATGGCAAAGTATGTTGCGTTGTG        |
| cofD - re      | CGACGGAGCTCGAATTCTTATGCGGTGCTGTGCTGCA           |
| cofE_fw        | AAATGGGTCGCGGATCCATGACTGTATCCGCCATC             |
| cofE_rv        | CGACGGAGCTCGAATTCTTAGGCCATTTCCACCG              |
| DB_pDB044_FP   | AAACCAGCAAGAAGCATGACTGTATCC                     |
| DB_pDB044_RP   | CCTCTACAATGACAACGGGCAC                          |
| DB_FP_MBP_5998 | GGATCGAGGGAAGGATTCAGAA                          |
| DB_RP_MBP_5998 | AAGCTTGCCTGCAGGTCGAC                            |
| DB_FP_pMal-c2X | GTCGACCTGCAGGCAAGCTT                            |
| DB_RP_pMal-c2X | TGAAATCCTTCCCTCGATCC                            |
| fbiB_fw        | AAATGGGTCGCGGATCCATGAGCGCAGCAGCAAATGCA          |
| fbiB_rv        | CGACGGAGCTCGAATTCTTATTTACGAACCAGCAGTTCATCGG     |
| oDB08          | CATGCTTCTTGCTGGTTTAACTTATTCAGGCTGCTTGTGTTGCAATG |
| oDB021         | TTTGTGGTAGCCTGTAAGGTTGATGGCTATACAGAAA           |
| oDB022         | CTCAGAACGGTAATCACTATCTTCCTGCGTAAAGATC           |
| oDB023         | GTGATTACCGTTCTGAGCG                             |
| oDB024         | TTACAGGCTACCACAAAATTCAATG                       |
| oDB069         | ATTCCTCAAGGTCGGCATTAAACGACGTTTAAACAAC           |
| oDB070         | ACCATTGCATCTCATATAGGC                           |
| oDB071         | TGCCGACCTTGAGGAATTC                             |

---

|              |                                                 |
|--------------|-------------------------------------------------|
| oDB081       | GGATCCGAATTCGAGCTC                              |
| oDB084       | AGCTCGAATTCGGATCCTCACAGAAATTTGATACCCAGTTCCG     |
| oDB085       | GGTACCCTCGAGTCTGGT                              |
| oDB088       | CCAGACTCGAGGGTACCTCATTGTTCCGCTTCACTCAAG         |
| oDB105       | CTAATATACTAAGATGGGGAATTG                        |
| oDB106       | CGAGTCTGGTAAAGAAACC                             |
| oDB107       | CAATTCCCCTCTTAGTATATTAGGAGATGCAATGGTATGTCTCC    |
| oDB108       | GGTTTCTTTACCAGACTCGTTATGCGGTGCTGTGCTGC          |
| oDB115       | GAGCTCGAATTCGGATCCTTATGCGGTGCTGTGCTG            |
| oDB122       | GTTTAACTTTAATAAGGAGATATACCATGCGTGTGGCTCTGCTG    |
| oDB123       | GGTATATCTCCTTATTAAAGTTAAACA                     |
| oDB124       | ATGTATATCTCCTTCTTATACTTAACT                     |
| oDB125       | GTTAAGTATAAGAAGGAGATATACATATGATCCAAGAGGTCTGAACG |
| oDB128       | GCCTATATGAGATGCAATGGTATGAACTGCGGCATCAAAATGA     |
| oDB129       | GAGCTCGAATTCGGATCCTTATGCGGTGCTGTGCTG            |
| oDB129B      | TAATAAGGAGATATACCATGTCTCCTGTTTCTGTTCGC          |
| pACYCduet-fw | GCCGCATAATGCTTAAGTCG                            |
| pACYCduet-rv | CGCAAGCTTGTCGACCTG                              |
| pET28a-fw    | GAATTCGAGCTCCGTCGACAAG                          |
| pET28a-rv    | GGATCCGCGACCCATTTGCTGT                          |

---

**Table S3.** Plasmids used in the study.

| Plasmid | Backbone   | Inserted genes                                                     | Size (bp) |
|---------|------------|--------------------------------------------------------------------|-----------|
| pDB045  | pETDuet-1  | <i>ribA, cofC, fbiC, cofD</i> , ABC transporter, <i>cofE</i>       | 13,135    |
| pDB060  | pETDuet-1  | <i>ribA, cofC, fbiC, cofD*</i> , ABC transporter, <i>cofE</i>      | 13,045    |
| pDB061  | pMAL-c2x   | MSMEG_5998                                                         | 6,067     |
| pDB065  | pCDFDuet-1 | <i>fno</i> (MCS1)                                                  | 4,385     |
| pDB070  | pETDuet-1  | <i>ribA, cofC*, fbiC, cofD*</i> , ABC transporter, and <i>cofE</i> | 13,136    |
| pDB071  | pCDFDuet-1 | <i>fno</i> (MCS1) and <i>cofC, fbiC, and cofD</i> (MCS2)           | 8,656     |
| pDL008  | pET28a     | <i>fno</i> ( <i>Archaeoglobus fulgidus</i> )                       | 5,878     |
| pMH01   | pET28a     | His6- <i>cofE</i> ( <i>Methanocaldococcus jannaschii</i> )         | 6,100     |
| pMH02   | pCDFDuet   | <i>cofC, fbiC, cofD</i> ( <i>P. rhizoxinica</i> )                  | 8,085     |
| pFS01   | pET28a     | His6- <i>cofE</i> ( <i>P. rhizoxinica</i> )                        |           |
| pFS03   | pACYCDuet  | His6- <i>cofC</i> ( <i>P. rhizoxinica</i> )                        | 4,659     |
| pFS04   | pET28a     | His6- <i>cofD</i> ( <i>M. jannaschii</i> )                         | 6,296     |
| pFS06   | pER28a     | His6- <i>fbiB</i> ( <i>Mycolicibacterium smegmatis</i> )           | 6,734     |

\*genes from *Methanocaldococcus jannaschii*.

## 2 Results

### 2.1 Fluorescence Microscopy

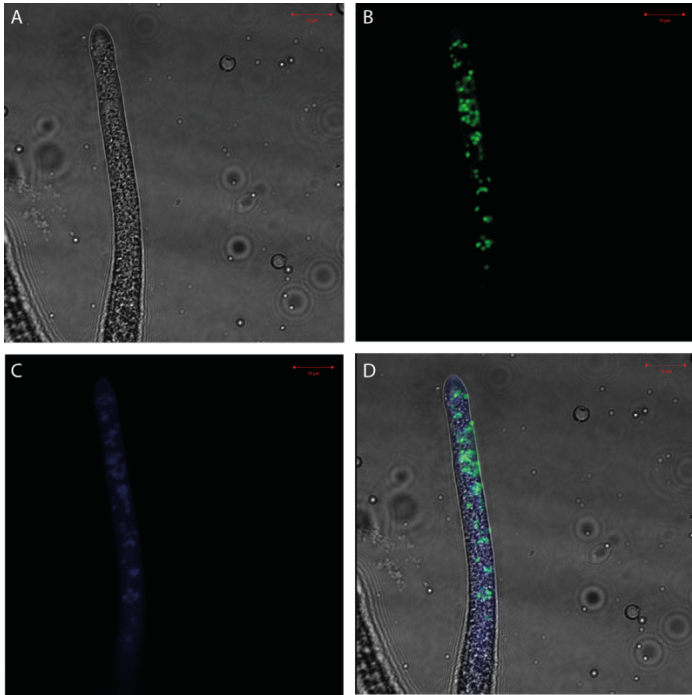

**Figure S1.** Fluorescence microscopy images of a hyphal tip of *Rhizopus microsporus* ATTC 62417 harbouring *Paraburkholderia rhizoxinica* endosymbionts (green). A) Brightfield B) Syto 9 channel in green C) deazaflavin-channel in blue (excitation: 405 nm, emission: approx. 470 nm; D) Overlay. Symbionts and fluorescence of deazaflavins are present within hyphae. Scale bars represent 10 μm.

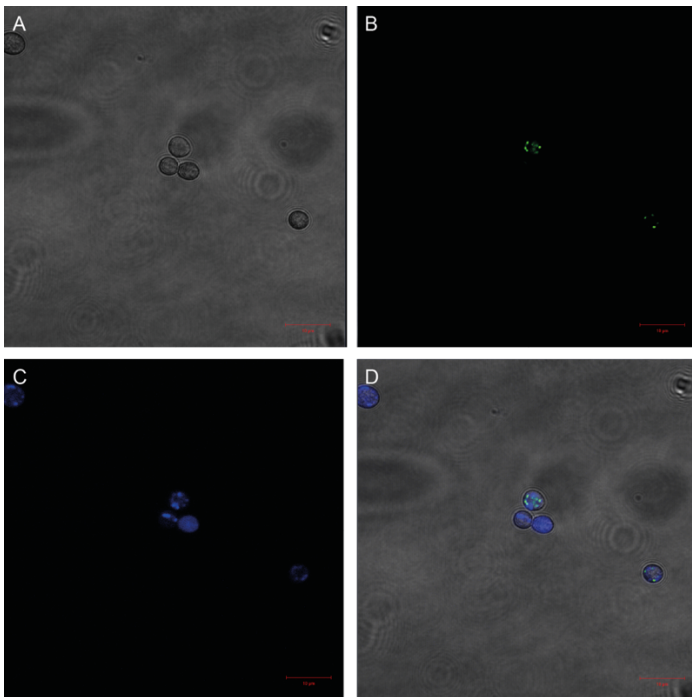

**Figure S2.** Fluorescence microscopy images of spores of *Rhizopus microsporus* ATTC 62417 harboring *Paraburkholderia rhizoxinica* endosymbionts (stained in green). A) Brightfield B) Syto 9 channel in green C) deazaflavin-channel in blue (excitation: 405 nm, emission: approx. 470 nm; D) Overlay. Symbionts and fluorescence of deazaflavins are present within spores. Scale bars represent 10 μm.



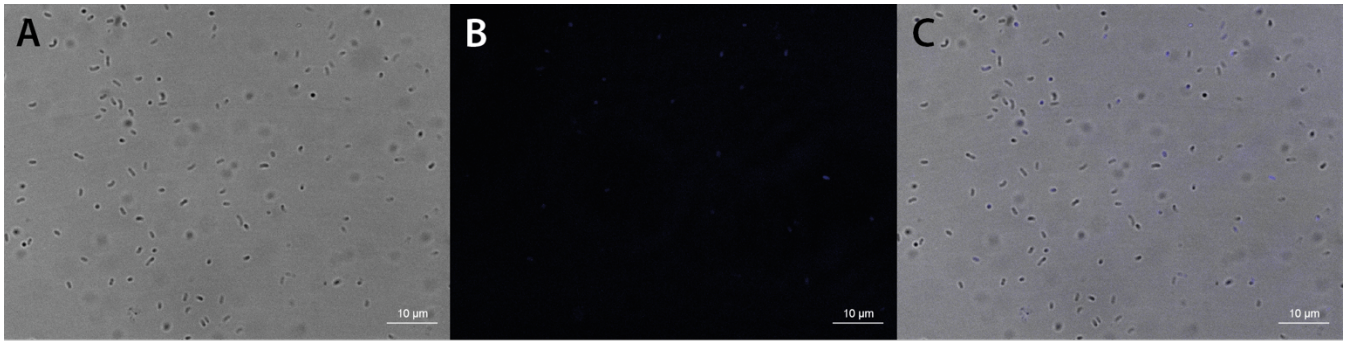

**Figure S3.** Fluorescence microscopy images of *Paraburkholderia rhizoxinica* in axenic culture. A) Brightfield B) Deazaflavin-channel in blue (excitation: 405 nm, emission: approx. 470 nm; C) Overlay. Bacteria display detectable, but weak, deazaflavin-related fluorescence. Scale bars represent 10 µm.

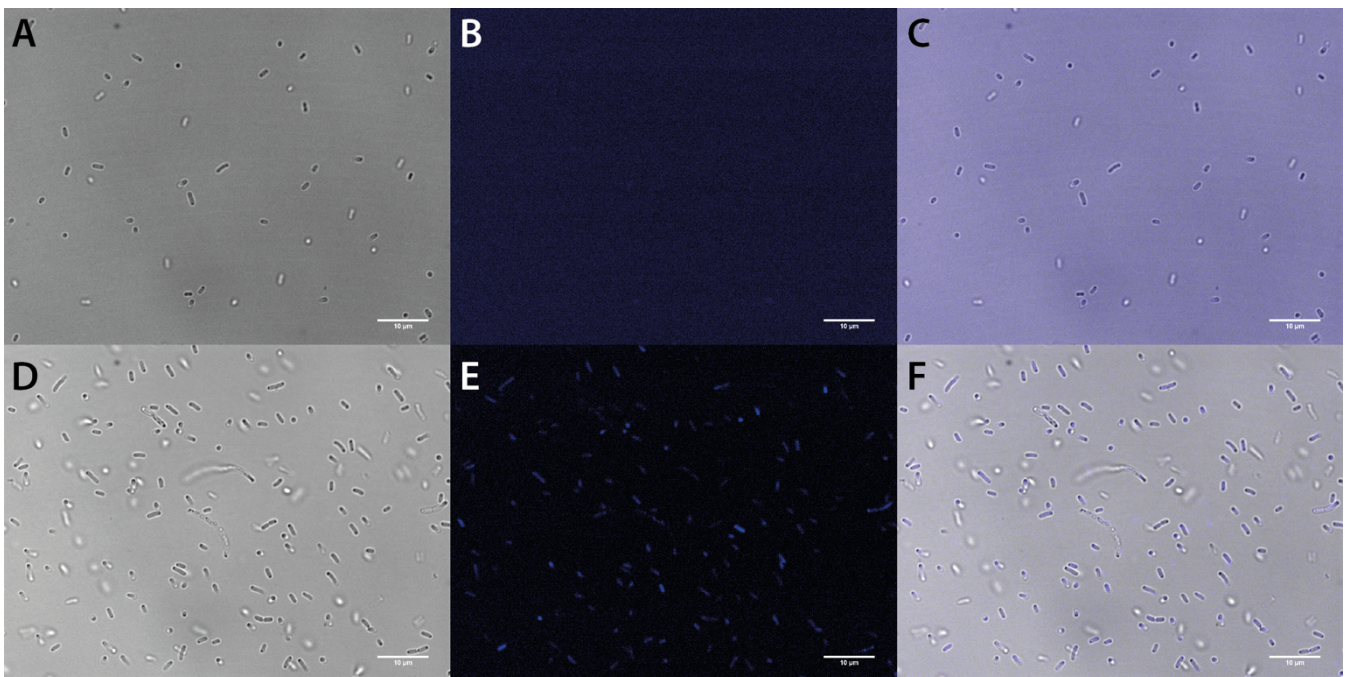

**Figure S4.** Fluorescence microscopy images of *E. coli*. A – C) Empty vector control (*E. coli* / pETDuet). D – F) 3PG-F<sub>420</sub>-producing *E. coli* / pDB045. Images shown correlate to brightfield (A, D), blue deazaflavin-channel (excitation: 405 nm, emission: approx. 470 nm; B, E), and brightfield-deazaflavin overlay (C, F). Engineered bacteria *E. coli* / pDB045 display strong deazaflavin-related fluorescence, fluorescence of vector controls *E. coli* / pETDuet is close to noise level.

## 2.2 Detection of 3PG-F<sub>420</sub> by LC-MS/MS

RT: 2.00 - 5.00

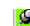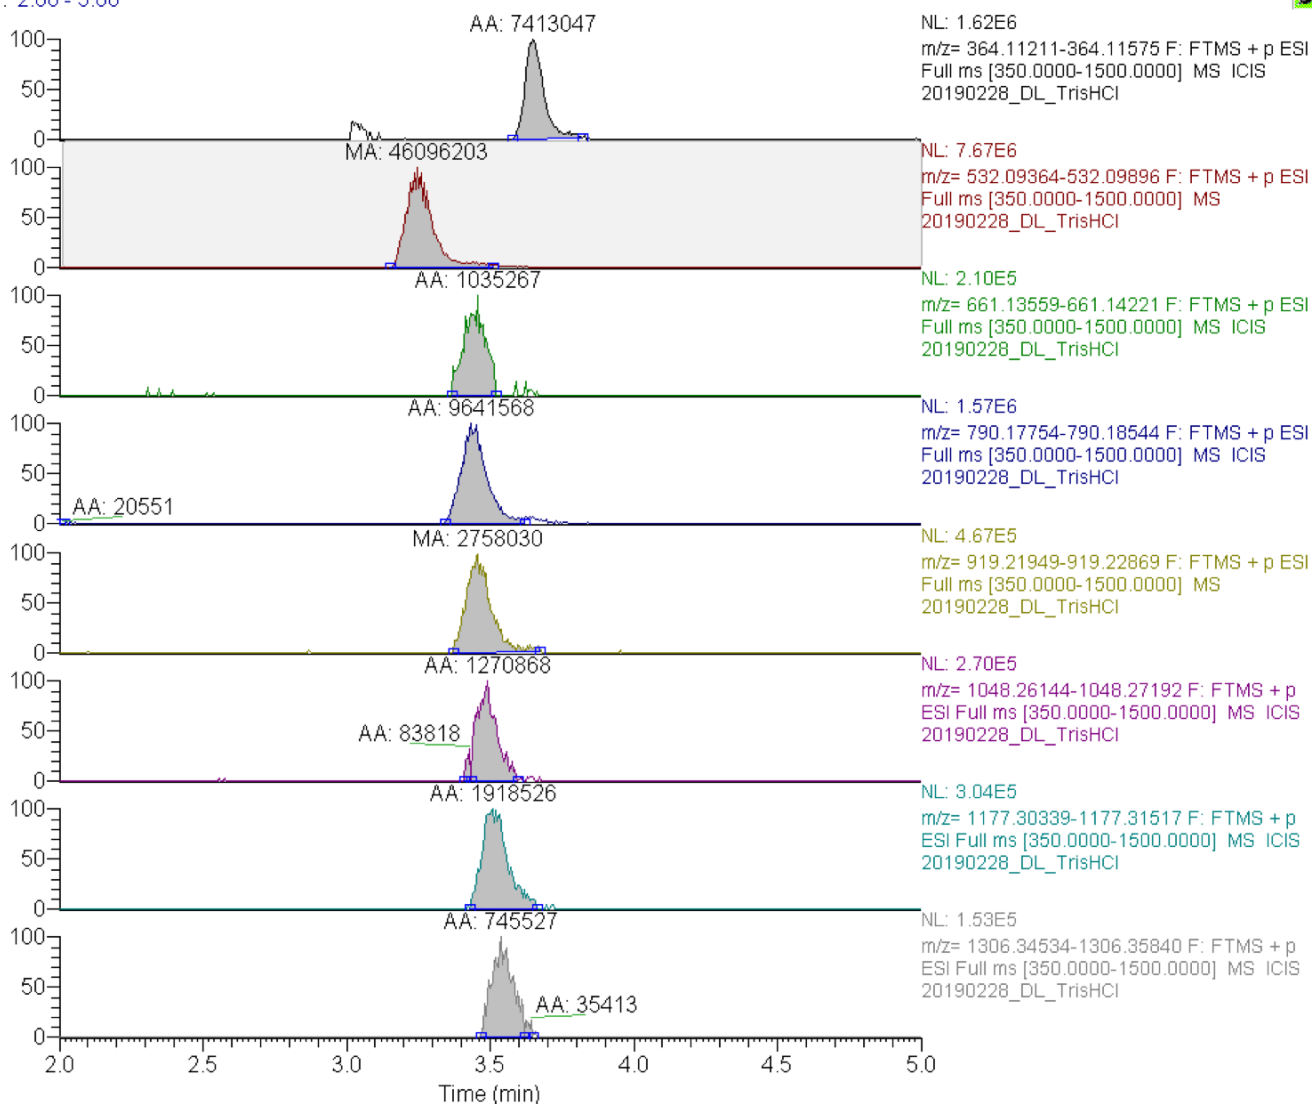

**Figure S5.** LC-MS analysis of extracts of 3PG-F<sub>420</sub>-producing *E. coli* BL21(DE3) /pDB045 showing XICs of 3PG-F<sub>420</sub>-n species with a varying number of (oligo)- $\gamma$ -glutamate residues. Expected masses ( $[M+H]^+$ , 10 ppm mass tolerance): F<sub>0</sub>: 364.11393, 3PG-F<sub>420</sub>-0: 532.09630, 3PG-F<sub>420</sub>-1: 661.13890, 3PG-F<sub>420</sub>-2: 790.18149, 3PG-F<sub>420</sub>-3: 919.22409, 3PG-F<sub>420</sub>-4: 1048.26668, 3PG-F<sub>420</sub>-5: 1177.30928, 3PG-F<sub>420</sub>-6: 1306.35187. Areas under the curve are indicated on top of each peak.

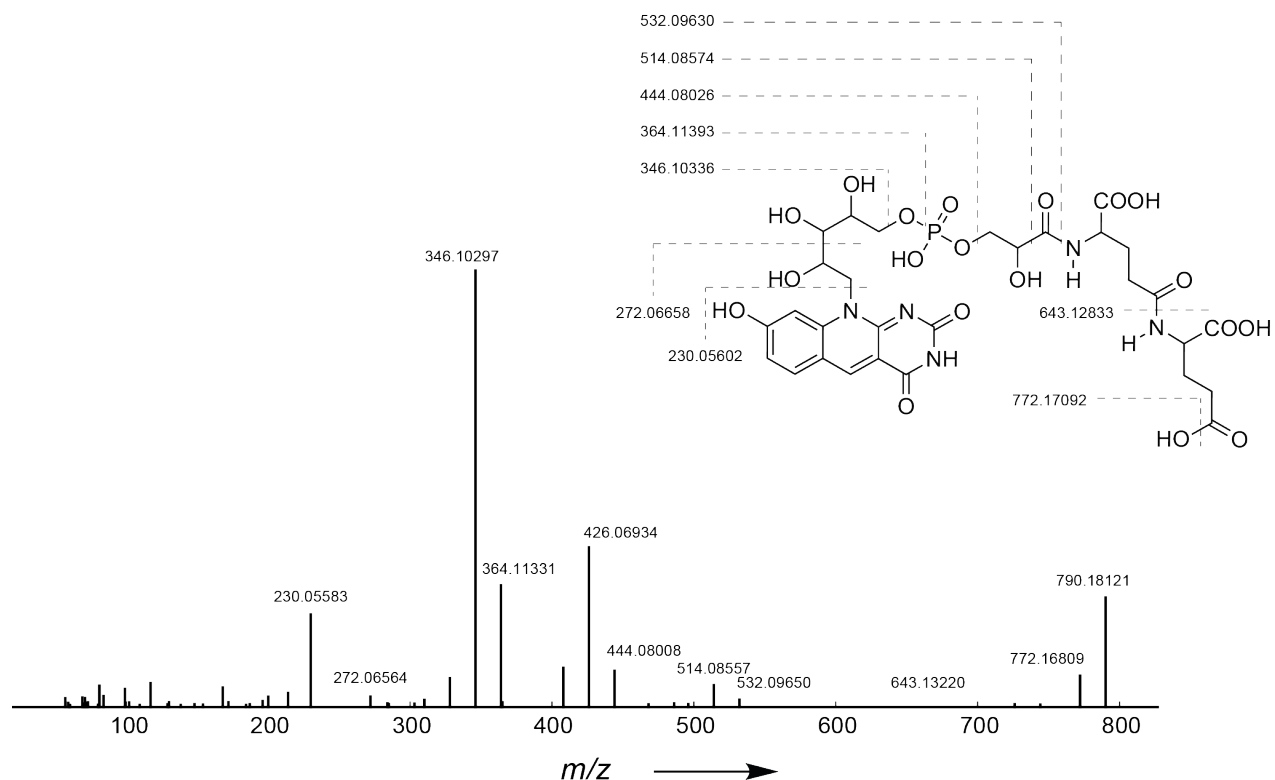

**Figure S6** Tandem-mass spectrum (MS<sup>2</sup>) of 3PG-F<sub>420</sub>-2 (precursor mass: [M+H]<sup>+</sup> m/z 790.18212, calculated: 790.18149) measured on a Thermo Q Exactive mass spectrometer (NCE 30, resolution: 17,500). Measured masses of characteristic peaks are indicated in the spectrum. The proposed fragmentation pattern with calculated fragment masses is shown (top right).

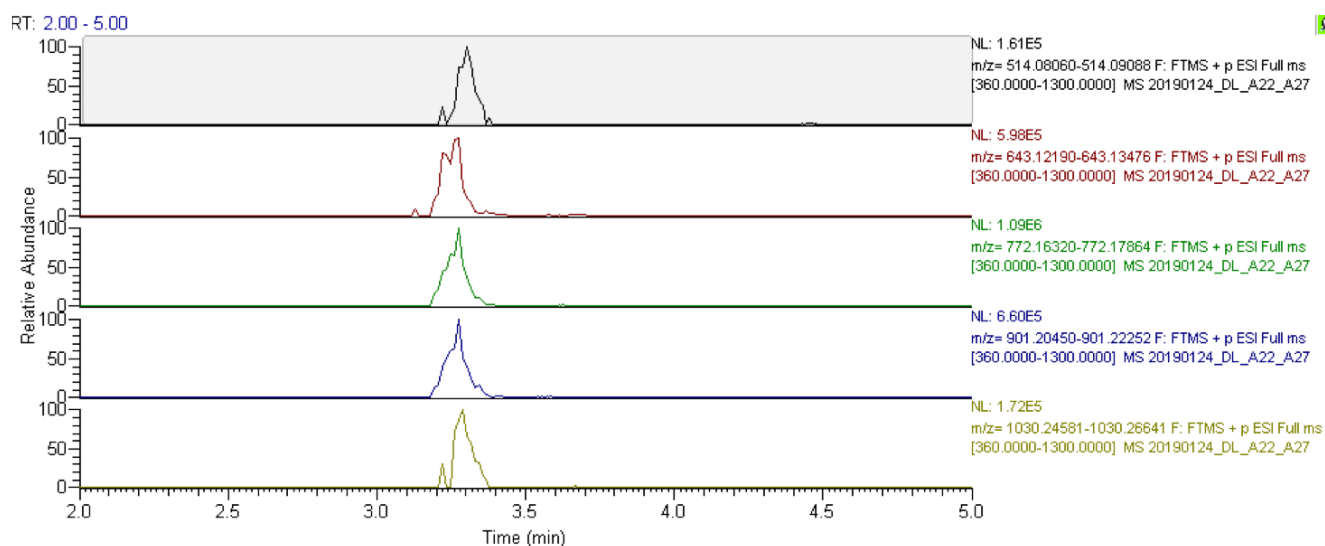

**Figure S7.** LC-MS analysis of extracts (large-scale cultivation) of *E. coli* BL21(DE3) /pDB45 showing XICs of dehydro-F<sub>420</sub>-n (DF<sub>420</sub>-n) species with a varying number of (oligo)- $\gamma$ -glutamate residues. Expected masses ([M+H]<sup>+</sup>, 5 ppm mass tolerance): DF<sub>420</sub>-0: 514.08574, DF<sub>420</sub>-1: 643.12833, DF<sub>420</sub>-2: 772.17092, DF<sub>420</sub>-3: 901.21351, DF<sub>420</sub>-4: 1030.25611.

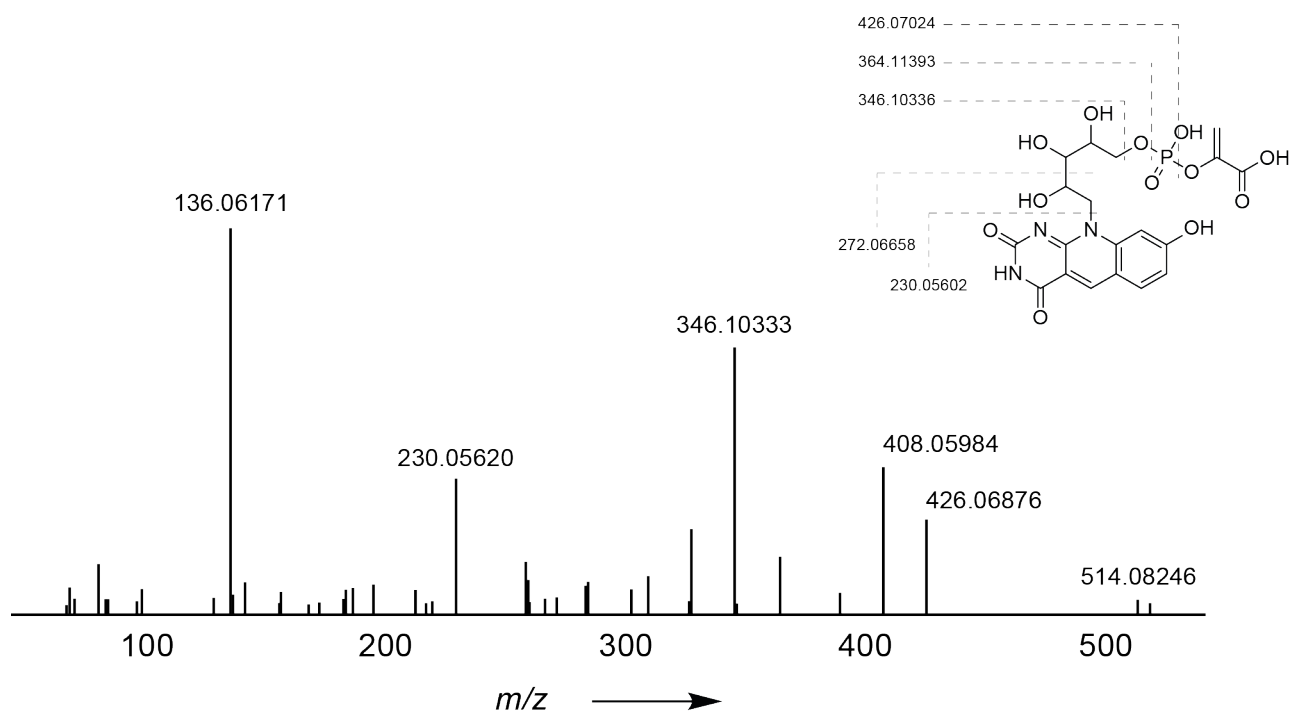

**Figure S8** Tandem-mass spectrum (MS<sup>2</sup>) of dehydro-F<sub>420</sub>-0 (DF<sub>420</sub>-0, precursor mass: [M+H]<sup>+</sup>:m/z 514.08246, calculated: 514.08574) measured on a Thermo Q Exactive mass spectrometer (NCE 30, resolution: 17,500). Measured masses of characteristic peaks are indicated in the spectrum. The proposed fragmentation pattern with calculated fragment masses is shown (top right). The peak at m/z 408.06 can be explained as fragment ion m/z 426.07 minus H<sub>2</sub>O (-18.01).

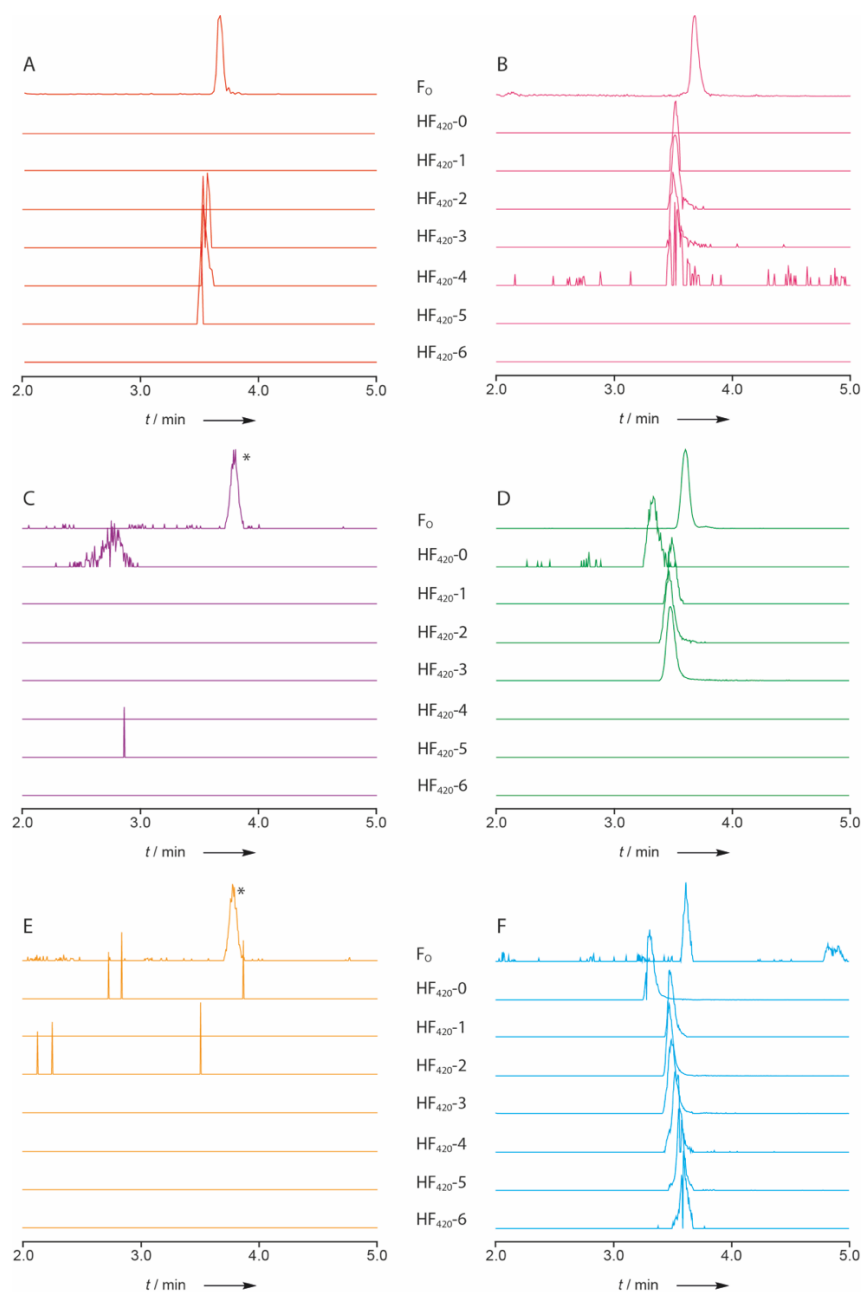

**Figure S9.** Overview of presence and absence of 3PG-F<sub>420</sub>-n species with a varying number of (oligo)- $\gamma$ -glutamate residues as assessed by LC-MS of microbial extracts (extracted ion chromatograms). Intensities are not drawn to scale, instead, minor peaks are zoomed for better visibility. A) *P. rhizoxinica* axenic culture (red), B) Symbiotic *P. rhizoxinica* isolated from *R. microsporus* ATCC 62417 (magenta), C) cured *R. microsporus* ATCC 62417 without symbionts (purple). D) *R. microsporus* ATCC 62417 with intracellular symbionts (green), E) Naturally symbiont-free *R. microsporus* CBS 344.29 control (yellow), G) 3PG-F<sub>420</sub> producing *E. coli* BL21(DE3)/pDB045 (blue). Extracted ion chromatograms (10 ppm mass tolerance) were extracted using the following exact masses ( $[M+H]^+$ ): F<sub>0</sub>: 364.11393, 3PG-F<sub>420</sub>-0: 532.09630, 3PG-F<sub>420</sub>-1: 661.13890, 3PG-F<sub>420</sub>-2: 790.18149, 3PG-F<sub>420</sub>-3: 919.22409, 3PG-F<sub>420</sub>-4: 1048.26668, 3PG-F<sub>420</sub>-5: 1177.30928, 3PG-F<sub>420</sub>-6: 1306.35187. \*The asterisks mark a fungal background peak with an m/z similar to the calculated m/z of F<sub>0</sub>, but consistently shifted retention time and lower intensity (see Figure S12).

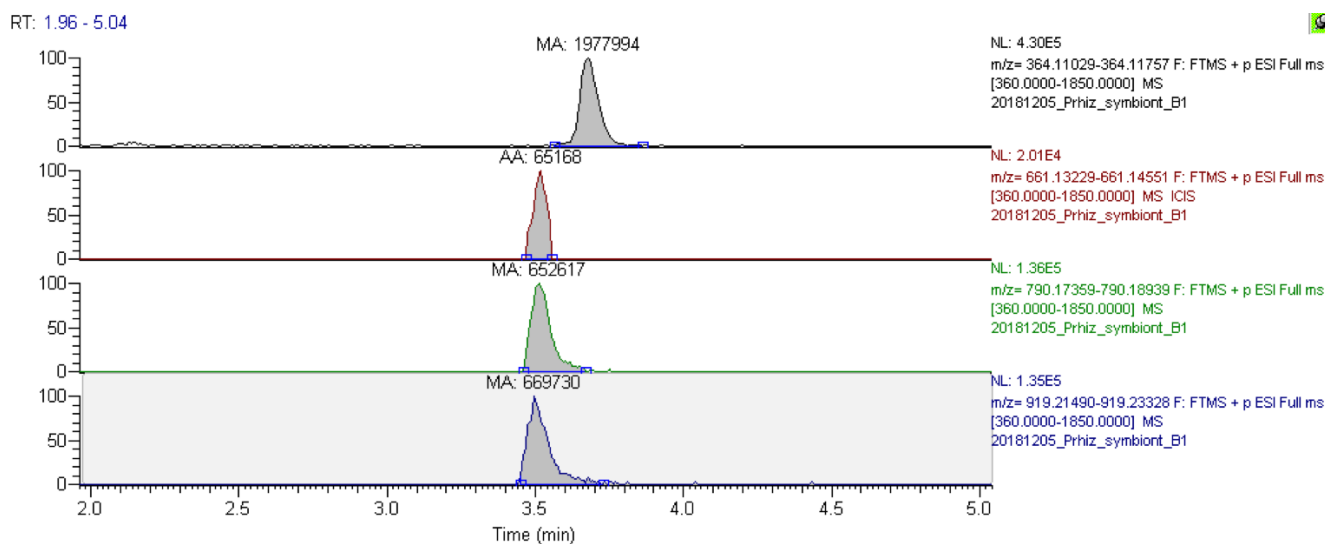

**Figure S10.** LC-MS analysis of extracts of *P. rhizoxinica* pellets isolated from symbiotic growth conditions showing extracted ion chromatograms (XIC) of 3PG-F<sub>420-n</sub> species with a varying number of (oligo)- $\gamma$ -glutamate residues. Expected masses ( $[M+H]^+$ , 10 ppm mass tolerance): F<sub>0</sub>: 364.11393, 3PG-F<sub>420-1</sub>: 661.13890, 3PG-F<sub>420-2</sub>: 790.18149, 3PG-F<sub>420-3</sub>: 919.22409. XICs of missing 3PG-F<sub>420-n</sub> species are not shown. Areas under the curve are indicated on top of each peak.

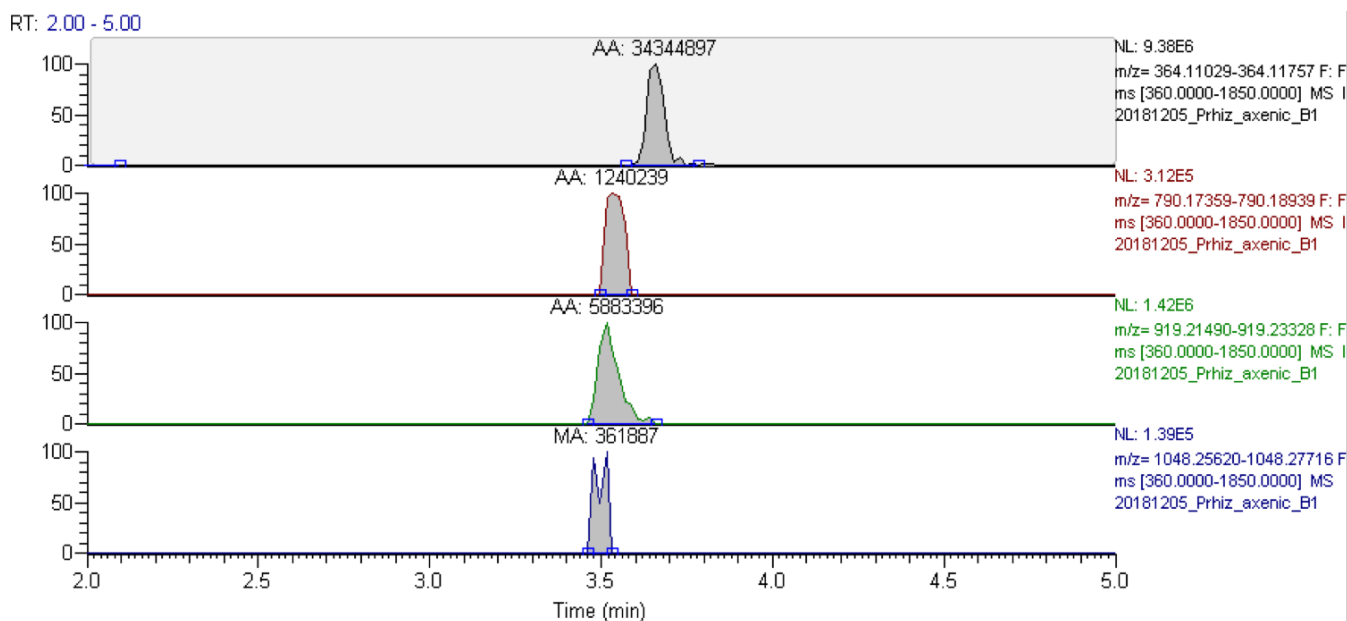

**Figure S11.** LC-MS analysis of extracts of *P. rhizoxinica* grown in axenic culture showing XICs of 3PG-F<sub>420-n</sub> species with a varying number of (oligo)- $\gamma$ -glutamate residues. Expected masses ( $[M+H]^+$ , 10 ppm mass tolerance): F<sub>0</sub>: 364.11393, 3PG-F<sub>420-2</sub>: 790.18149, 3PG-F<sub>420-3</sub>: 919.22409, 3PG-F<sub>420-4</sub>: 1048.26668. XICs of missing 3PG-F<sub>420-n</sub> species are not shown. Areas under the curve are indicated on top of each peak.

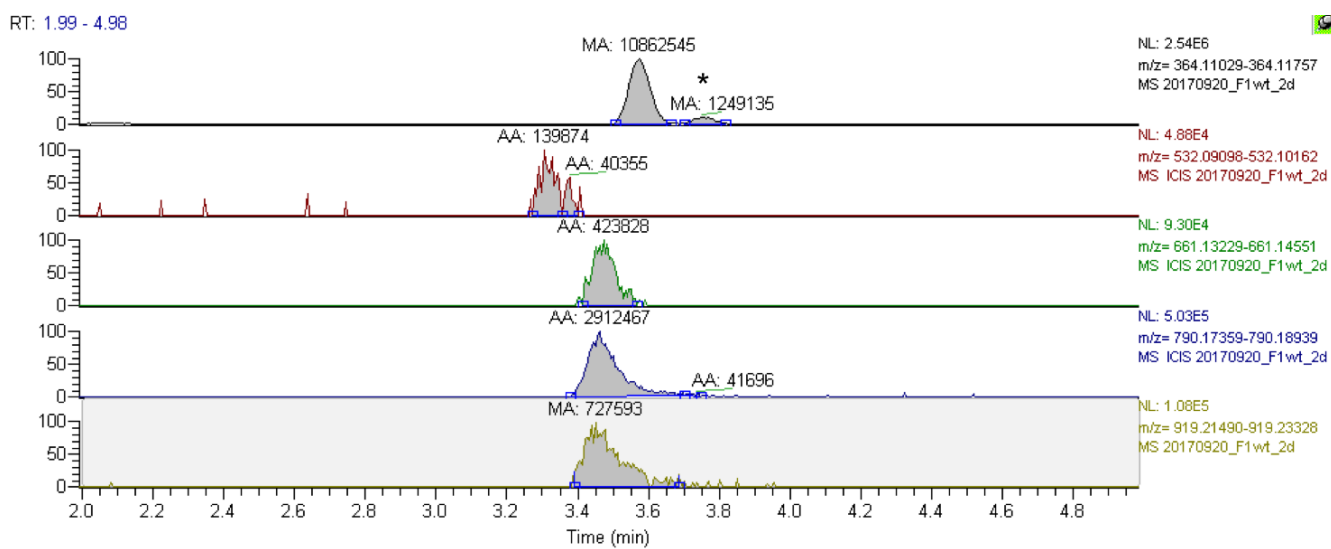

**Figure S12.** LC-MS analysis of extracts of *R. microsporus* ATCC 62417 with intracellular symbionts (*P. rhizoxinica*) showing XICs of 3PG-F<sub>420-n</sub> species with a varying number of (oligo)- $\gamma$ -glutamate residues. Expected masses ( $[M+H]^+$ , 10 ppm mass tolerance): F<sub>0</sub>: 364.11393, 3PG-F<sub>420-0</sub>: 532.09630, 3PG-F<sub>420-1</sub>: 661.13890, 3PG-F<sub>420-2</sub>: 790.18149, 3PG-F<sub>420-3</sub>: 919.22409. Areas under the curve are indicated on top of each peak. XICs of missing 3PG-F<sub>420-n</sub> species are not shown. \*A fungal background peak with an m/z close to 364.11393 (F<sub>0</sub>) elutes shortly after F<sub>0</sub> at 3.8 min. This isobaric compound is not related to deazaflavins.

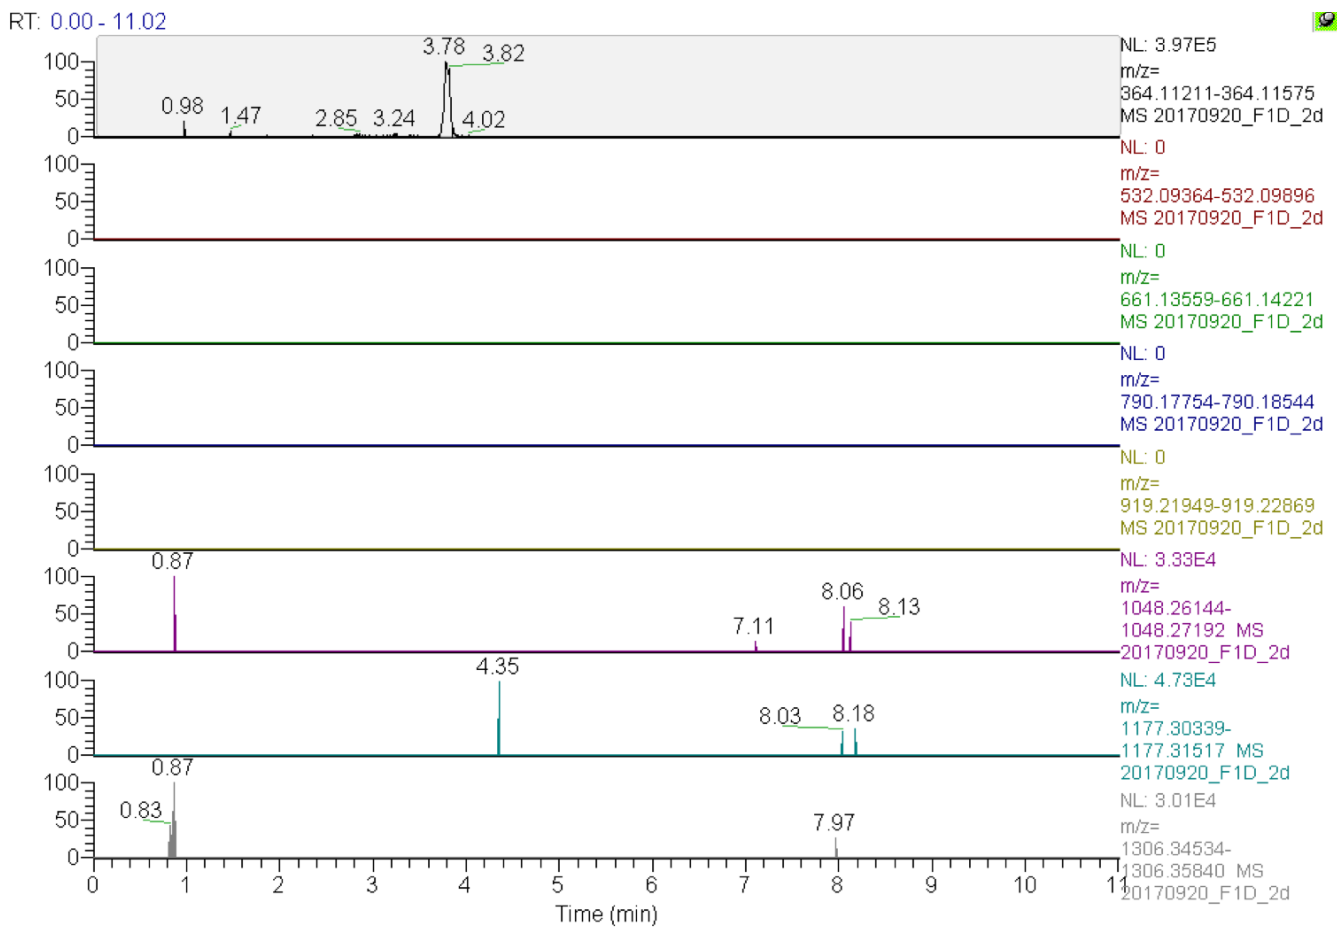

**Figure S13.** LC-MS analysis of extracts of cured *R. microsporus* ATCC 62417 without symbionts (*P. rhizoxinica*) showing XICs of 3PG-F<sub>420</sub>-n species with a varying number of (oligo)- $\gamma$ -glutamate residues. Expected masses ( $[M+H]^+$ , 10 ppm mass tolerance): F<sub>0</sub>: 364.11393, 3PG-F<sub>420</sub>-0: 532.09630, 3PG-F<sub>420</sub>-1: 661.13890, 3PG-F<sub>420</sub>-2: 790.18149, 3PG-F<sub>420</sub>-3: 919.22409, 3PG-F<sub>420</sub>-4: 1048.26668, 3PG-F<sub>420</sub>-5: 1177.30928, 3PG-F<sub>420</sub>-6: 1306.35187. The peak eluting at 3.8 is not F<sub>0</sub>, but corresponds to the isobaric background compound mentioned above (Figure S12).



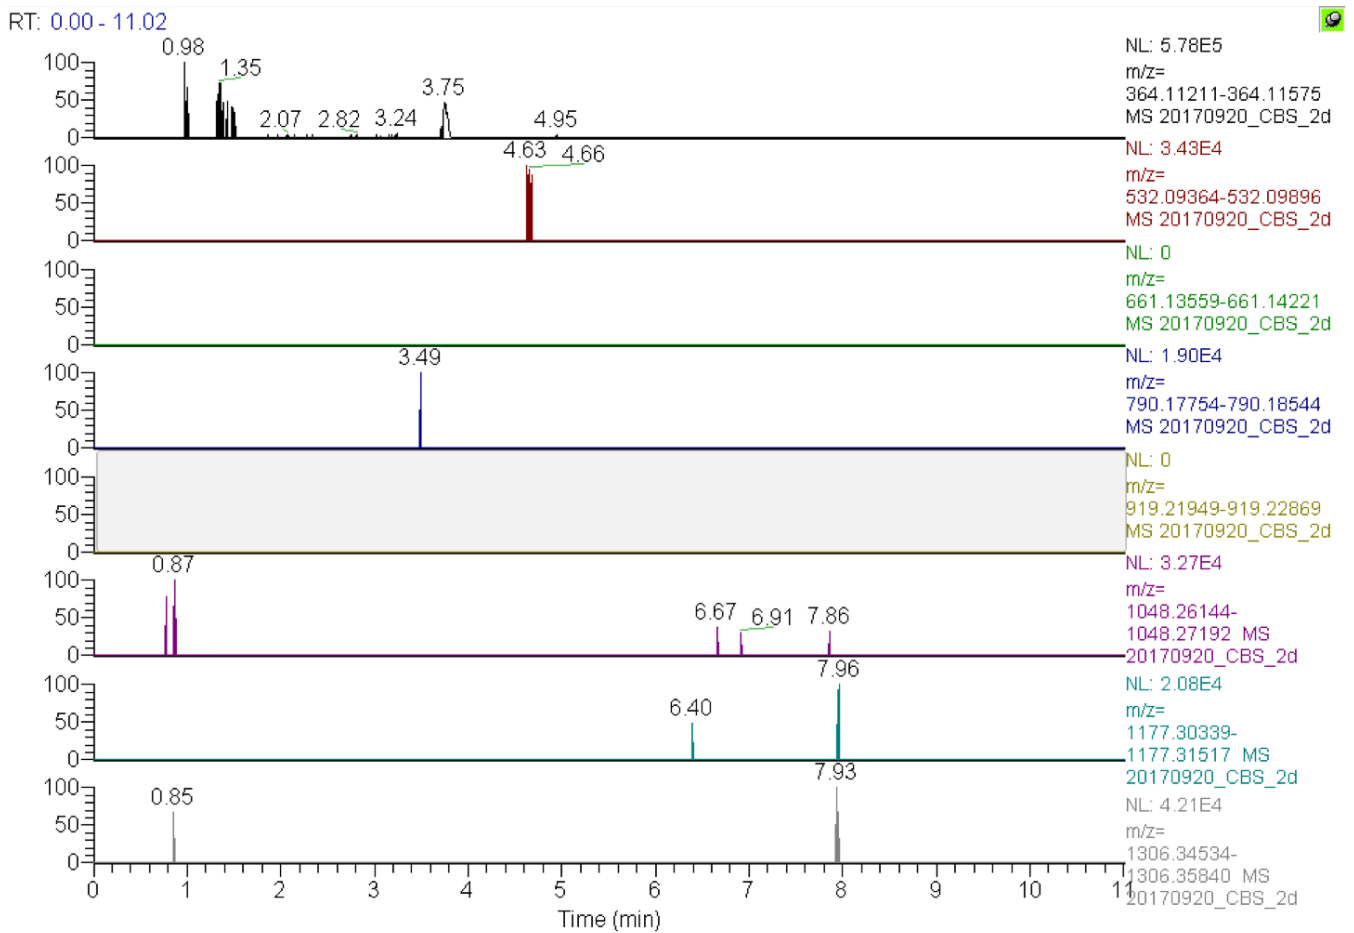

**Figure S14.** LC-MS analysis of extracts of naturally symbiont-free *R. microsporus* CBS 344.29 showing XICs of 3PG-F<sub>420</sub>-n species with a varying number of (oligo)- $\gamma$ -glutamate residues. Expected masses ( $[M+H]^+$ , 10 ppm mass tolerance): F<sub>0</sub>: 364.11393, 3PG-F<sub>420</sub>-0: 532.09630, 3PG-F<sub>420</sub>-1: 661.13890, 3PG-F<sub>420</sub>-2: 790.18149, 3PG-F<sub>420</sub>-3: 919.22409, 3PG-F<sub>420</sub>-4: 1048.26668, 3PG-F<sub>420</sub>-5: 1177.30928, 3PG-F<sub>420</sub>-6: 1306.35187. The peak eluting at 3.8 is not F<sub>0</sub>, but corresponds to the isobaric background compound mentioned above (Figure S12).

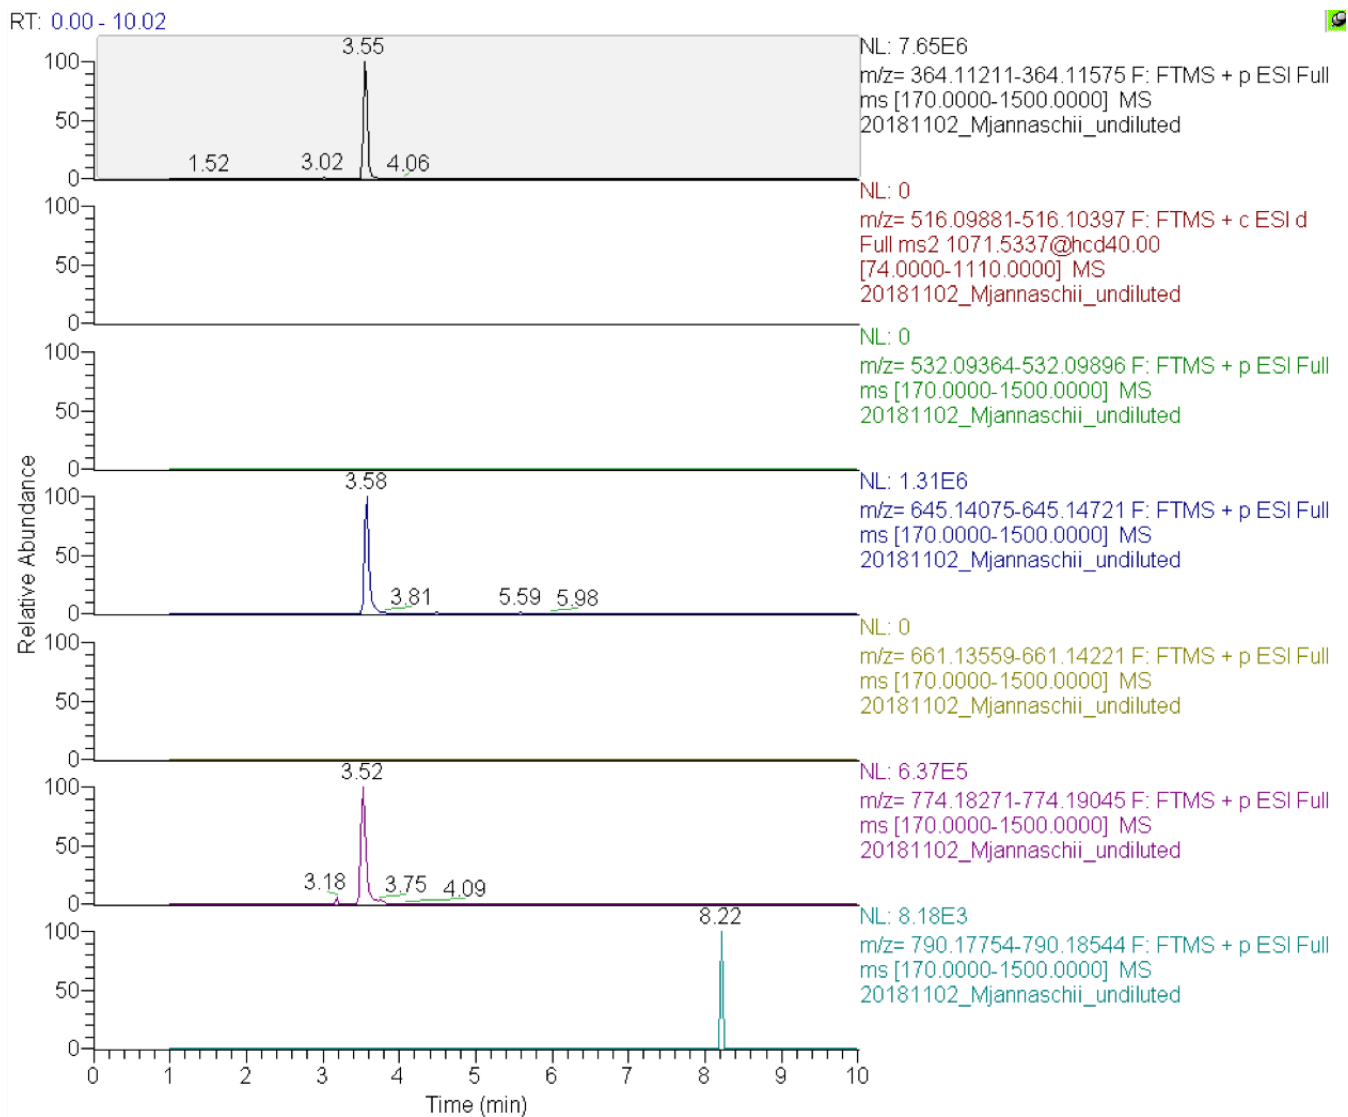

**Figure S15.** LC-MS analysis of extracts of *M. jannaschii* showing XICs of F<sub>420</sub>-n and 3PG-F<sub>420</sub>-n with a varying number of (oligo)- $\gamma$ -glutamate residues. Expected masses ( $[M+H]^+$ , 5 ppm mass tolerance): F<sub>0</sub>: 364.11393, F<sub>420</sub>-0: 516.10139, 3PG-F<sub>420</sub>-0: 532.09630, F<sub>420</sub>-1: 645.14398, 3PG-F<sub>420</sub>-1: 661.13890, F<sub>420</sub>-2: 774.18658, 3PG-F<sub>420</sub>-2: 790.18149. While classical F<sub>420</sub>-n was produced in good yields, 3PG-F<sub>420</sub>-0 and F<sub>420</sub>-0 were not detected.

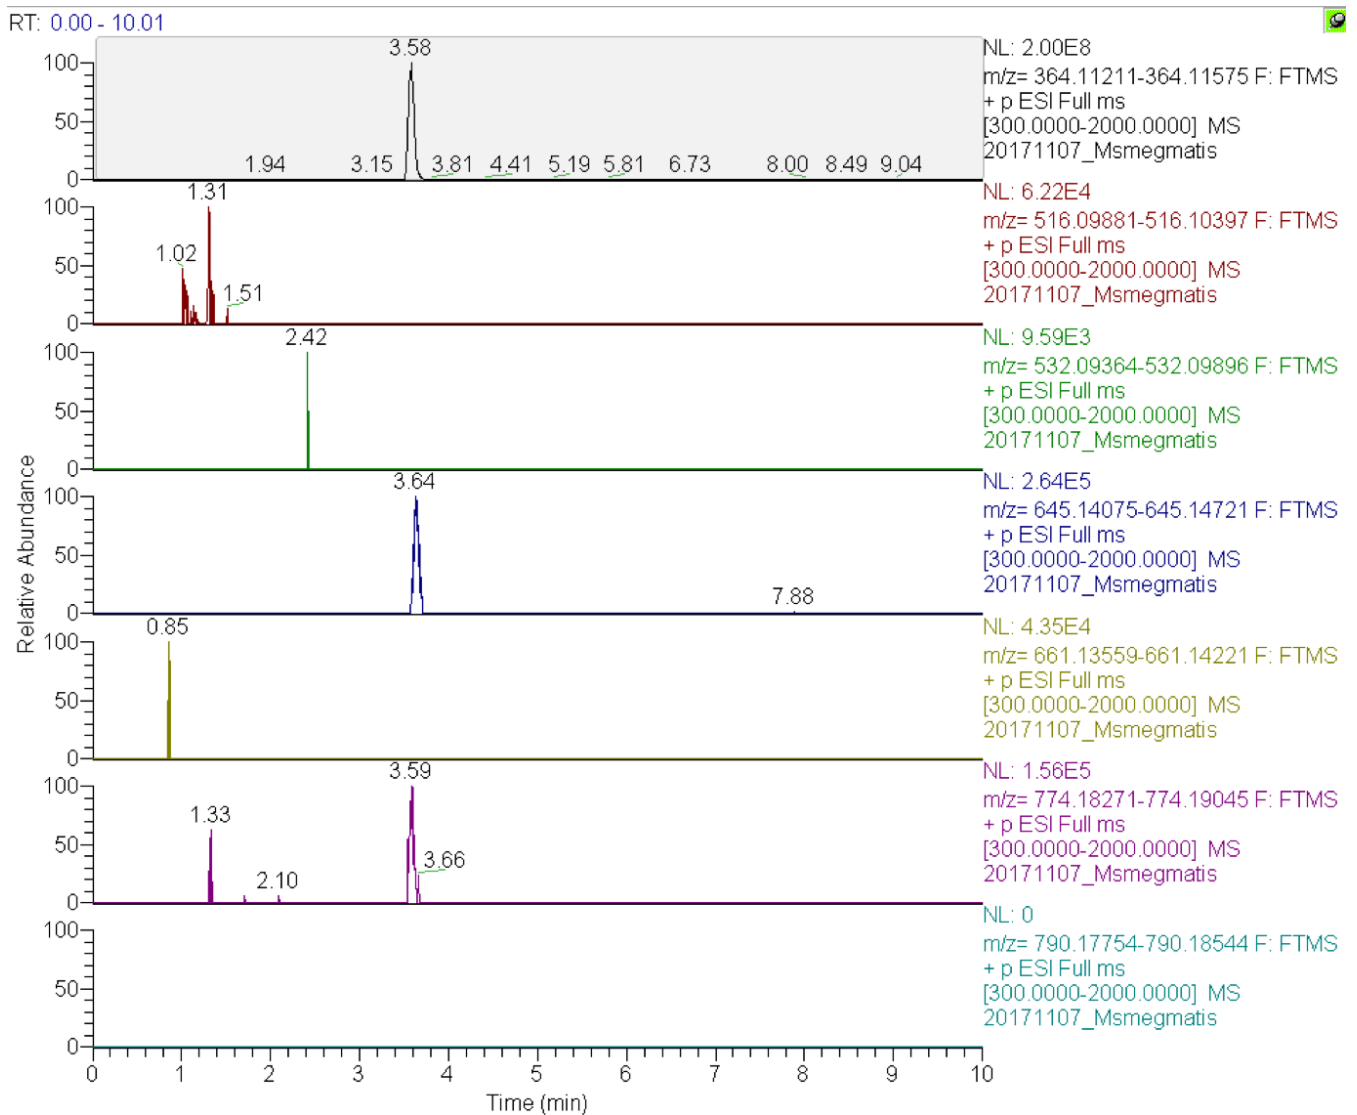

**Figure S16.** LC-MS analysis of extracts of *M. smegmatis* showing XICs of F<sub>420</sub>-n and 3PG-F<sub>420</sub>-n with a varying number of (oligo)- $\gamma$ -glutamate residues. Expected masses ( $[M+H]^+$ , 5 ppm mass tolerance): F<sub>0</sub>: 364.11393, F<sub>420</sub>-0: 516.10139, 3PG-F<sub>420</sub>-0: 532.09630, F<sub>420</sub>-1: 645.14398, 3PG-F<sub>420</sub>-1: 661.13890, F<sub>420</sub>-2: 774.18658, 3PG-F<sub>420</sub>-2: 790.18149. While classical F<sub>420</sub>-n was produced in good yields, 3PG-F<sub>420</sub> was not detectable. F<sub>420</sub>-0 was not found.

**A**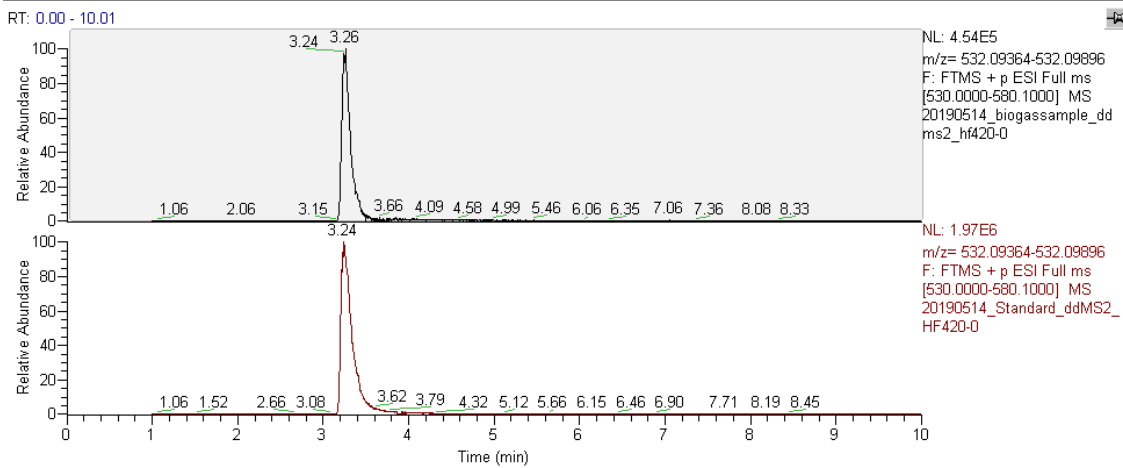**B**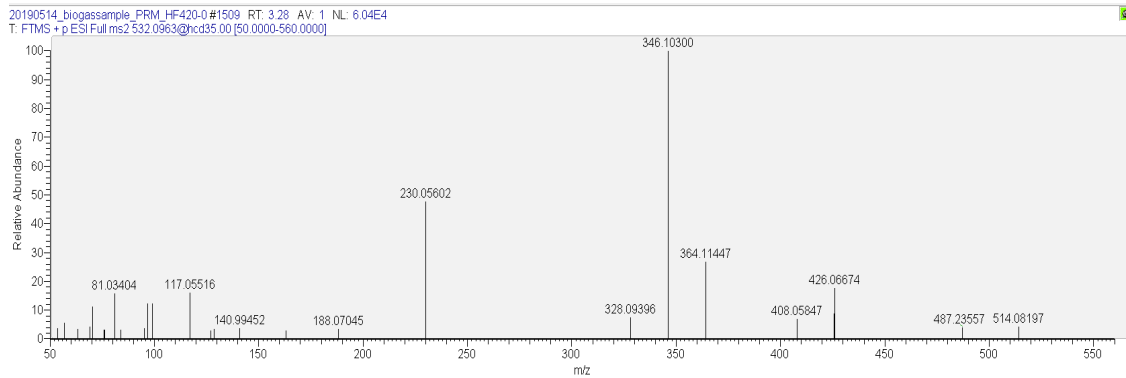

**Figure S17.** LC-MS analysis of extracts of a biogas-producing microbial community after HPLC purification. A) XIC at m/z 532.09630 (corresponds to 3PG-F<sub>420</sub>-0 [M+H]<sup>+</sup>). Upper chromatogram: sample. Lower chromatogram: 3PG-F<sub>420</sub>-0 standard. B) The MS/MS spectrum of the peak eluting at RT 3.34 min displaying characteristic fragments of F<sub>420</sub> derivatives (m/z 230.06, 346.10, 364.11, 408.06, 426.07, 514.08).

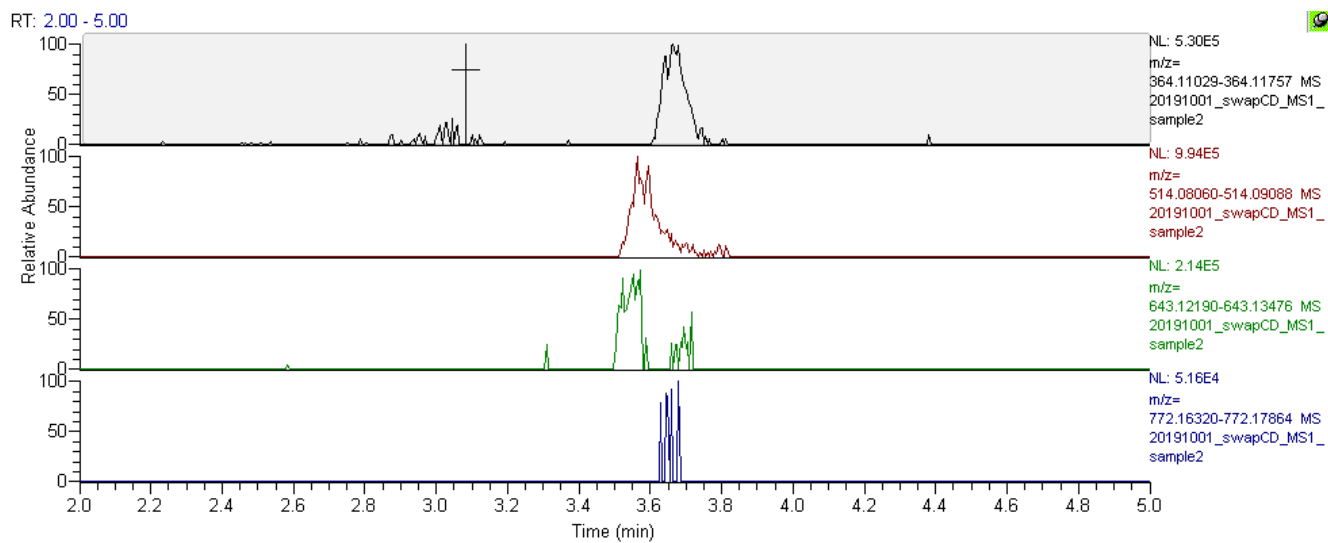

**Figure S18.** LC-MS analysis of extracts of *E. coli* BL21(DE3) /pDB070 showing XICs of dehydro-F<sub>420</sub>-n (DF<sub>420</sub>-n) species with a varying number of (oligo)- $\gamma$ -glutamate residues. Expected masses ( $[M+H]^+$ , 10 ppm mass tolerance): DF<sub>420</sub>-0: 514.08574, DF<sub>420</sub>-1: 643.12833, DF<sub>420</sub>-2: 772.17092.

## 2.3 Structure elucidation of deazaflavins

### 2.3.1 Structure elucidation of classical $F_{420}$ (control)

Classical  $F_{420-n}$  was obtained as described above as yellow solid directly eluted from FPLC and submitted for 1D and 2D NMR analysis. The composition of mixed  $F_{420-n}$  was determined as  $F_{420-4}$  with the molecular formula of  $C_{39}H_{50}O_{24}N_7P$  based on the ESI-HRMS analysis ( $m/z$  1032.26904 ( $[M+H]^+$  calcd. 1032.27176  $\Delta = -2.63$  ppm);  $F_{420-5}$  with the molecular formula of  $C_{44}H_{57}O_{27}N_8P$  based on the ESI-HRMS analysis ( $m/z$  1161.31250 ( $[M+H]^+$  calcd. 1161.31435  $\Delta = -1.59$  ppm);  $F_{420-6}$  with the molecular formula of  $C_{49}H_{64}O_{30}N_9P$  based on the ESI-HRMS analysis ( $m/z$  1290.35486 ( $[M+H]^+$  calcd. 1290.35694  $\Delta = -1.62$  ppm);  $F_{420-7}$  with the molecular formula of  $C_{54}H_{73}O_{33}N_{10}P$  based on the ESI-HRMS analysis ( $m/z$  710.20178 ( $[2M+H]^{2+}$  calcd. 710.20341  $\Delta = -2.29$  ppm). Thorough interpretation of the  $^1H$  NMR and  $^{13}C$  NMR spectra ( $D_2O$ ) indicated the typical 5-deazaflavin moiety with the observation of  $\delta_{H-5}$  8.82 ppm,  $\delta_{C-5}$  144.8 ppm;  $\delta_{H-6}$  7.91 ppm,  $\delta_{C-6}$  135.5 ppm;  $\delta_{H-7}$  7.16 ppm,  $\delta_{C-7}$  118.1 ppm;  $\delta_{H-9}$  7.31 ppm,  $\delta_{C-9}$  102.3 ppm. The ribityl moiety was deduced from the observation of  $\delta_{H2-1}$  4.67/4.97 ppm,  $\delta_{C-1}$  49.31 ppm;  $\delta_{H-2}$  4.37 ppm,  $\delta_{C-2}$  70.2 ppm;  $\delta_{H-3}$  3.99 ppm,  $\delta_{C-3}$  73.3 ppm;  $\delta_{H-4}$  4.07 ppm,  $\delta_{C-4}$  71.8 ppm;  $\delta_{H2-5}$  4.07/4.17 ppm,  $\delta_{C-5}$  67.4 ppm. The lactyl moiety was assigned based on the observation of resonance at  $\delta_{H-6}$  4.70 ppm,  $\delta_{C-6}$  72.6 ppm;  $\delta_{H3-7}$  1.49 ppm,  $\delta_{C-7}$  19.9 ppm;  $\delta_{C-8}$  175.4 ppm. Due to the overlapped signals from the glutamyl chain, the assignment of one unit can be deduced from the observation of  $\delta_{H-10}$  4.35 ppm,  $\delta_{C-10}$  52.5 ppm;  $\delta_{H2-11}$  1.94/2.21 ppm,  $\delta_{C-11}$  27.0 ppm;  $\delta_{H2-12}$  2.41 ppm,  $\delta_{C-12}$  32.0 ppm;  $\delta_{C-13}$  175.6 ppm;  $\delta_{C-14}$  175.7 ppm. The doublets of C-4', C-5', C-6', C-7' and C-8' indicated the  $^{13}C-^{31}P$  coupling ( $^3J_{C-4'-P} = 7.56$  Hz,  $^2J_{C-5'-P} = 5.06$  Hz,  $^2J_{C-6'-P} = 4.94$  Hz,  $^3J_{C-7'-P} = 2.93$  Hz,  $^3J_{C-8'-P} = 6.60$  Hz) between the carbon atoms of the ribityl and lactyl moieties assigned to these resonances and the phosphorus of the phosphate group. Finally, the classical  $F_{420-n}$  was confirmed based on the match with literature reported NMR data recorded in  $D_2O$ . (8) Shift in  $^{13}C$  resonances are presumably a result of the presence of ammonium salts and/or pH differences as indicated in the literature. Detailed assignment is present in Table S4-6.

**Table S4.** NMR Data (DMSO-*d*<sub>6</sub>, at 300 K) for F<sub>420-n</sub>.<sup>a</sup>

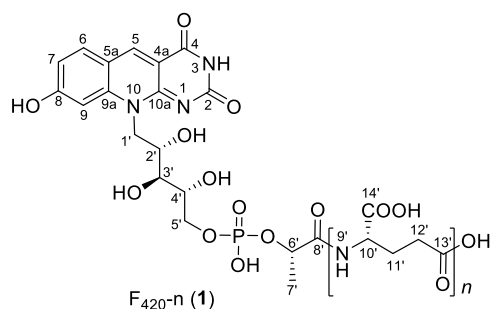

| position             | F <sub>420-n</sub>                                                 |                                          |                |                    |          |
|----------------------|--------------------------------------------------------------------|------------------------------------------|----------------|--------------------|----------|
|                      | δ <sub>C</sub> , mult. <sup>b</sup> ( <i>J</i> in Hz) <sup>c</sup> | δ <sub>H</sub> , mult. ( <i>J</i> in Hz) | COSY           | HMBC               | NOESY    |
| <i>N</i> (1)         |                                                                    |                                          |                |                    |          |
| 2                    | n.d.                                                               |                                          |                |                    |          |
| NH (3)               |                                                                    | 11.04, br s                              |                | 4a                 |          |
| 4                    | 162.37, qC                                                         |                                          |                |                    |          |
| 4a                   | 110.65, qC                                                         |                                          |                |                    |          |
| 5                    | 141.66, CH                                                         | 8.90, s                                  |                | 4, 5a, 6, 9a, 10a  | 6        |
| 5a                   | 115.64, qC                                                         |                                          |                |                    |          |
| 6                    | 133.83, CH                                                         | 8.04, d (8.87)                           | 7              | 5, 5a, 8, 9a       | 5        |
| 7                    | 115.51, CH                                                         | 7.04, dd (8.87,                          | 6, 9           | 5a, 9              |          |
| 8                    | 164.53, qC                                                         |                                          |                |                    |          |
| 9                    | 102.16, CH                                                         | 7.40, s                                  | 7              | 5a, 8, 9a          | 1'a, 1'b |
| 9a                   | 144.01, qC                                                         |                                          |                |                    |          |
| 10                   |                                                                    |                                          |                |                    |          |
| 10a                  | 157.80, qC                                                         |                                          |                |                    |          |
| 1'a                  | 48.14, CH <sub>2</sub>                                             | 4.80, m                                  |                |                    | 9        |
| 1'b                  |                                                                    | 4.65, m                                  |                |                    | 9        |
| 2'                   | 69.28, CH                                                          | 4.25, m                                  | 3'             |                    |          |
| 3'                   | 73.67, CH                                                          | 3.62, t (5.37)                           | 2', 4'         | 1', 2', 4'         |          |
| 4'                   | 70.98, CH <sub>2</sub> (6.97)                                      | 3.89, m                                  | 2', 3'         | 3', 5'             |          |
| 5'a                  | 68.25, CH <sub>2</sub>                                             | 4.13, m                                  | 4', 5'b        | 3'                 |          |
| 5'b                  |                                                                    | 3.94, m                                  | 5'a            | 4'                 |          |
| 6'                   | 71.72, CH (4.96)                                                   | 4.67, q (7.12)                           | 8'             | 7', 8'             | NH (9')  |
| 7'                   | 19.62, CH <sub>3</sub> (3.19)                                      | 1.39, d (7.12)                           | 6'             | 6', 8'             | NH (9')  |
| 8'                   | 170.77, qC                                                         |                                          |                |                    |          |
| NH (9') <sup>d</sup> |                                                                    | 8.10, d (8.45)                           | 10'            |                    | 6', 7'   |
| 10' <sup>d</sup>     | 51.50, CH                                                          | 4.15, m                                  | 9', 11'b       | 11', 12', 13', 14' |          |
| 11'a <sup>d</sup>    | 26.97, CH <sub>2</sub>                                             | 1.96, m                                  | 10', 11'a, 12' | 10', 12', 13', 14' |          |
| 11'b <sup>d</sup>    |                                                                    | 1.74, m                                  | 10', 11'a, 12' | 10', 12', 13', 14' |          |
| 12' <sup>d</sup>     | 31.50, CH <sub>2</sub>                                             | 2.20, m                                  | 11'a, 11'b     | 10', 11', 13'      |          |
| 13' <sup>d</sup>     | 171.45, qC                                                         |                                          |                |                    |          |
| 14' <sup>d</sup>     | 173.37, qC                                                         |                                          |                |                    |          |

<sup>a</sup> 600 MHz for <sup>1</sup>H NMR and 150 MHz for <sup>13</sup>C NMR

<sup>b</sup> numbers of attached protons were determined by analysis of 2D spectra.

<sup>c</sup> coupling constant indicated <sup>13</sup>C-<sup>31</sup>P coupling

<sup>d</sup> NMR resonance are overlapped by glutamate chains and only one unit was presented.

**Table S5.** NMR Data (D<sub>2</sub>O, at 300 K) for F<sub>420-n</sub>.<sup>a</sup>

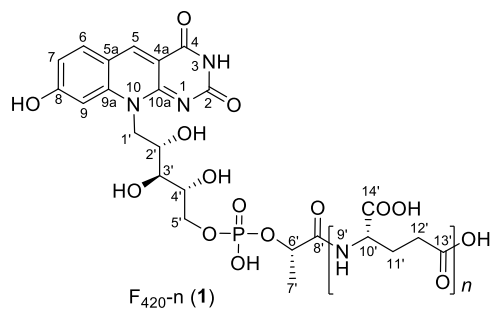

|                      | F <sub>420-n</sub>                                             |                                      |              |                    |        |
|----------------------|----------------------------------------------------------------|--------------------------------------|--------------|--------------------|--------|
| position             | $\delta_C$ , mult. <sup>b</sup> ( <i>J</i> in Hz) <sup>c</sup> | $\delta_H$ , mult. ( <i>J</i> in Hz) | COSY         | HMBC               | NOESY  |
| NH (1)               |                                                                |                                      |              |                    |        |
| 2                    | 156.58, qC                                                     |                                      |              |                    |        |
| NH (3)               |                                                                |                                      |              |                    |        |
| 4                    | 163.56, qC                                                     |                                      |              |                    |        |
| 4a                   | 109.67, qC                                                     |                                      |              |                    |        |
| 5                    | 144.76, CH                                                     | 8.82, s                              |              | 4, 5a, 6, 9a, 10a  | 6      |
| 5a                   | 117.91, qC                                                     |                                      |              |                    |        |
| 6                    | 135.44, CH                                                     | 7.92, d (8.80)                       | 7            | 5a, 8, 9a          | 5, 7   |
| 7                    | 118.69, CH                                                     | 7.16, dd (8.80, 1.70)                | 6            | 5a, 9              | 5      |
| 8                    | 166.33, qC                                                     |                                      |              |                    |        |
| 9                    | 102.33, CH                                                     | 7.31, s                              |              | 5a, 8, 9a          |        |
| 9a                   | 143.96, qC                                                     |                                      |              |                    |        |
| 10                   |                                                                |                                      |              |                    |        |
| 10a                  | 155.79, qC                                                     |                                      |              |                    |        |
| 1'a                  | 49.30, CH <sub>2</sub>                                         | 4.96, m                              | 2'           |                    | 4'     |
| 1'b                  |                                                                | 4.69, m                              | 2'           |                    |        |
| 2'                   | 70.19, CH                                                      | 4.37, m                              | 1'a, 1'b, 3' |                    | 4'     |
| 3'                   | 73.24, CH                                                      | 3.99, t (3.65)                       | 2', 4'       | 1', 2', 4', 5'     |        |
| 4'                   | 71.76, CH <sub>2</sub> , d, (7.56)                             | 4.07, m                              | 3'           |                    | 1', 2' |
| 5'a                  | 67.42, CH <sub>2</sub> , d, (5.06)                             | 4.17, m                              | 5'b          | 3'                 |        |
| 5'b                  |                                                                | 4.07, m                              | 5'a          | 3'                 |        |
| 6'                   | 72.53, CH d, (4.94)                                            | 4.70, q (7.12)                       | 7'           | 7', 8'             |        |
| 7'                   | 19.93, CH <sub>3</sub> , d, (2.93)                             | 1.49, d (6.89)                       | 6'           | 6', 8'             |        |
| 8'                   | 175.29, qC, d, (6.60)                                          |                                      |              |                    |        |
| NH (9') <sup>d</sup> |                                                                |                                      |              |                    |        |
| 10' <sup>d</sup>     | 52.31, CH                                                      | 4.35, m                              | 11'a, 11'b   | 11', 12', 14'      |        |
| 11'a <sup>d</sup>    | 26.98, CH <sub>2</sub>                                         | 2.21, m                              | 10', 12'     | 10', 12', 13', 14' |        |
| 11'b <sup>d</sup>    |                                                                | 1.96, m                              | 10', 12'     | 10', 12', 13', 14' |        |
| 12' <sup>d</sup>     | 31.98, CH <sub>2</sub>                                         | 2.41, m                              | 11'a, 11'b   | 10', 11', 13'      |        |
| 13' <sup>d</sup>     | 175.59, qC                                                     |                                      |              |                    |        |
| 14' <sup>d</sup>     | 175.54, qC                                                     |                                      |              |                    |        |

<sup>a</sup> 600 MHz for <sup>1</sup>H NMR and 150 MHz for <sup>13</sup>C NMR

<sup>b</sup> numbers of attached protons were determined by analysis of 2D spectra.

<sup>c</sup> coupling constant indicated <sup>13</sup>C-<sup>31</sup>P coupling

<sup>d</sup> NMR resonance are overlapped by glutamate chains and only one unit was presented.



**Table S6.**  $^{13}\text{C}$  NMR comparison of  $\text{F}_{420-n}$  with reported for  $\text{F}_{420-2}$ .(8)

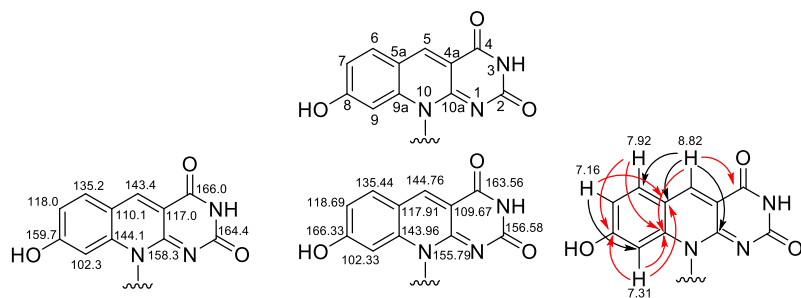

| $\text{F}_{420-2}$ (Wolfe, 1978) | $\text{F}_{420-n}$ (1)                                             | $\text{F}_{420-n}$ (1)                                      |
|----------------------------------|--------------------------------------------------------------------|-------------------------------------------------------------|
|                                  | $\text{F}_{420-n}$ in $\text{D}_2\text{O}$                         | $\text{F}_{420-2}$ (ammonium salt in $\text{D}_2\text{O}$ ) |
| position                         | $\delta_{\text{C}}$ , mult. <sup>b</sup> ( $J$ in Hz) <sup>c</sup> | $\delta_{\text{C}}$ , mult. ( $J$ in Hz)                    |
| $\text{N}$ (1)                   |                                                                    |                                                             |
| <b>2</b>                         | <b>156.58, qC</b>                                                  | <b>164.4</b>                                                |
| $\text{NH}$ (3)                  |                                                                    |                                                             |
| <b>4</b>                         | <b>163.56, qC</b>                                                  | <b>166.0</b>                                                |
| <b>4a</b>                        | <b>109.67, qC</b>                                                  | <b>117.0</b>                                                |
| 5                                | 144.76, CH                                                         | 143.4                                                       |
| <b>5a</b>                        | <b>117.91, qC</b>                                                  | <b>110.1</b>                                                |
| 6                                | 135.44, CH                                                         | 135.2                                                       |
| 7                                | 118.69, CH                                                         | 118.0                                                       |
| <b>8</b>                         | <b>166.33, qC</b>                                                  | <b>159.7</b>                                                |
| 9                                | 102.33, CH                                                         | 102.3                                                       |
| 9a                               | 143.96, qC                                                         | 144.1                                                       |
| 10                               |                                                                    |                                                             |
| 10a                              | 155.79, qC                                                         | 158.3                                                       |
| 1'a                              | 49.30, $\text{CH}_2$                                               | 48.3                                                        |
| 1'b                              |                                                                    |                                                             |
| 2'                               | 70.19, CH                                                          | 70.5                                                        |
| 3'                               | 73.24, CH                                                          | 73.7                                                        |
| 4'                               | 71.76, $\text{CH}_2$ , d (7.56)                                    | 71.9, d (7.9)                                               |
| 5'a                              | 67.42, $\text{CH}_2$ , d (5.06)                                    | 67.9, d (5.1)                                               |
| 5'b                              |                                                                    |                                                             |
| 6'                               | 72.53, CH, d (4.94)                                                | 73.0, d (5.2)                                               |
| 7'                               | 19.93, $\text{CH}_3$ , d (2.93)                                    | 20.5                                                        |
| 8'                               | 175.31, qC, d (6.60)                                               | 174.9, d (6.1)                                              |
| $\text{NH}$ (9')                 |                                                                    |                                                             |
| 10'                              | 52.31, CH                                                          | 55.0                                                        |
| 11'a                             | 26.98, $\text{CH}_2$                                               | 28.5                                                        |
| 11'b                             |                                                                    |                                                             |
| 12'                              | 31.98, $\text{CH}_2$                                               | 32.9                                                        |
| 13'                              | 175.59, qC                                                         | 175.8                                                       |
| 14'                              | 175.54, qC                                                         | 178.5                                                       |

<sup>a</sup>chemical shifts in the table and key HMBC correlations are highlighted in red; shift in  $^{13}\text{C}$  resonances are presumably a result of the presence of ammonium salts and/or pH differences as indicated in the literature.

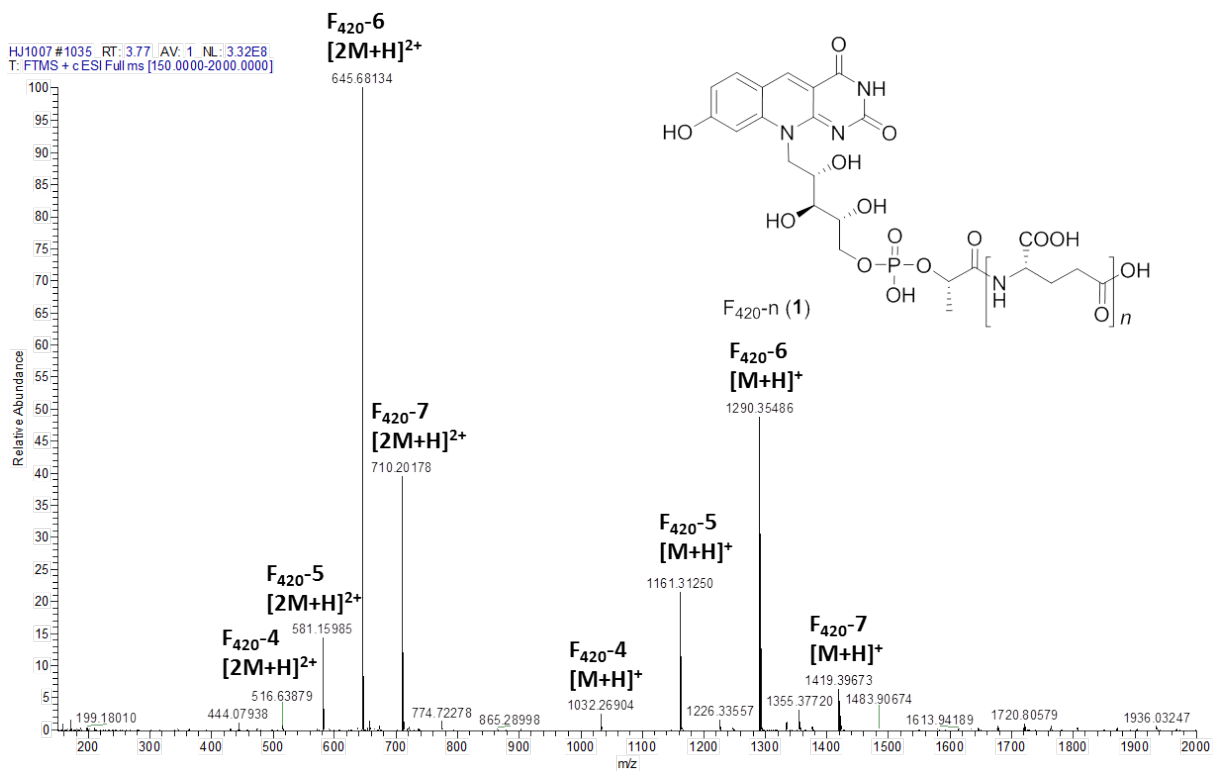

Figure S19. ESI-HRMS spectrum of F<sub>420-n</sub>.

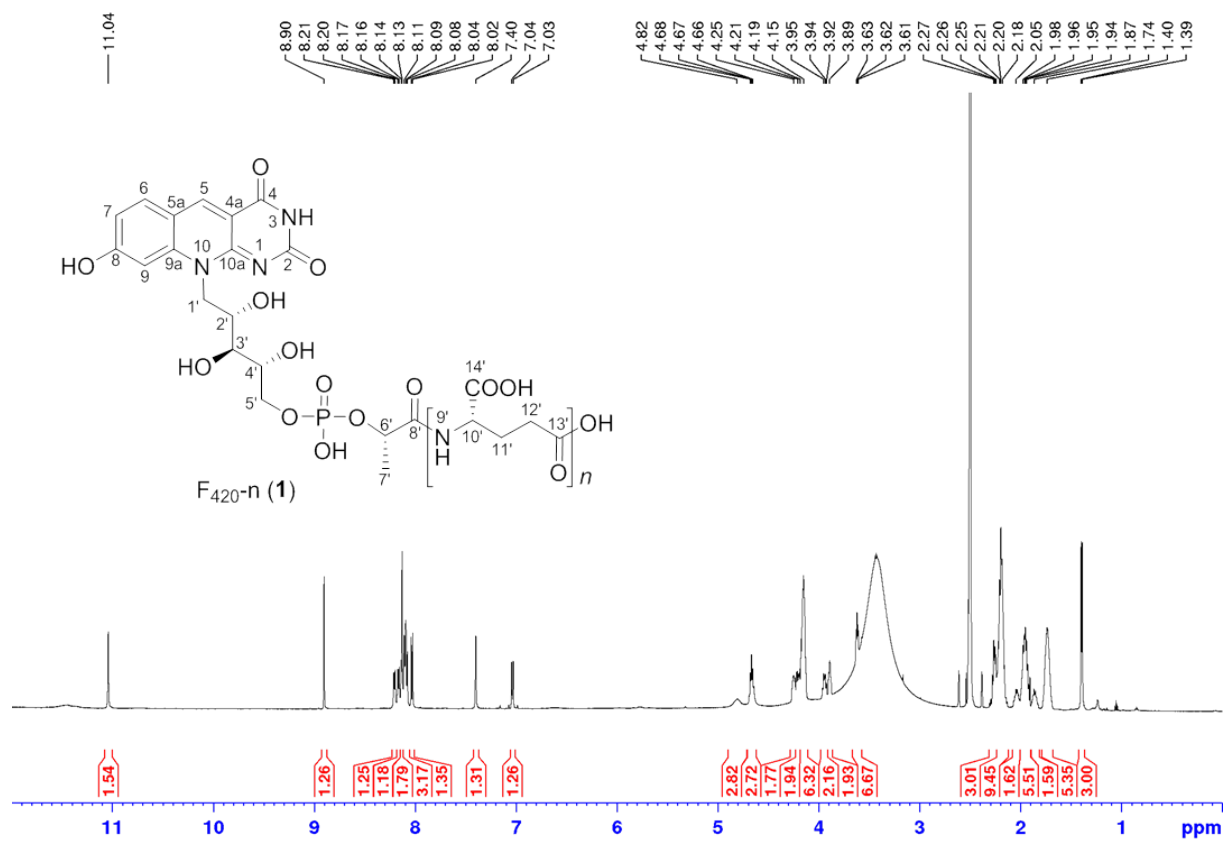

Figure S20. <sup>1</sup>H NMR spectrum of F<sub>420-n</sub> (DMSO-*d*<sub>6</sub>, 600 MHz, 300 K).

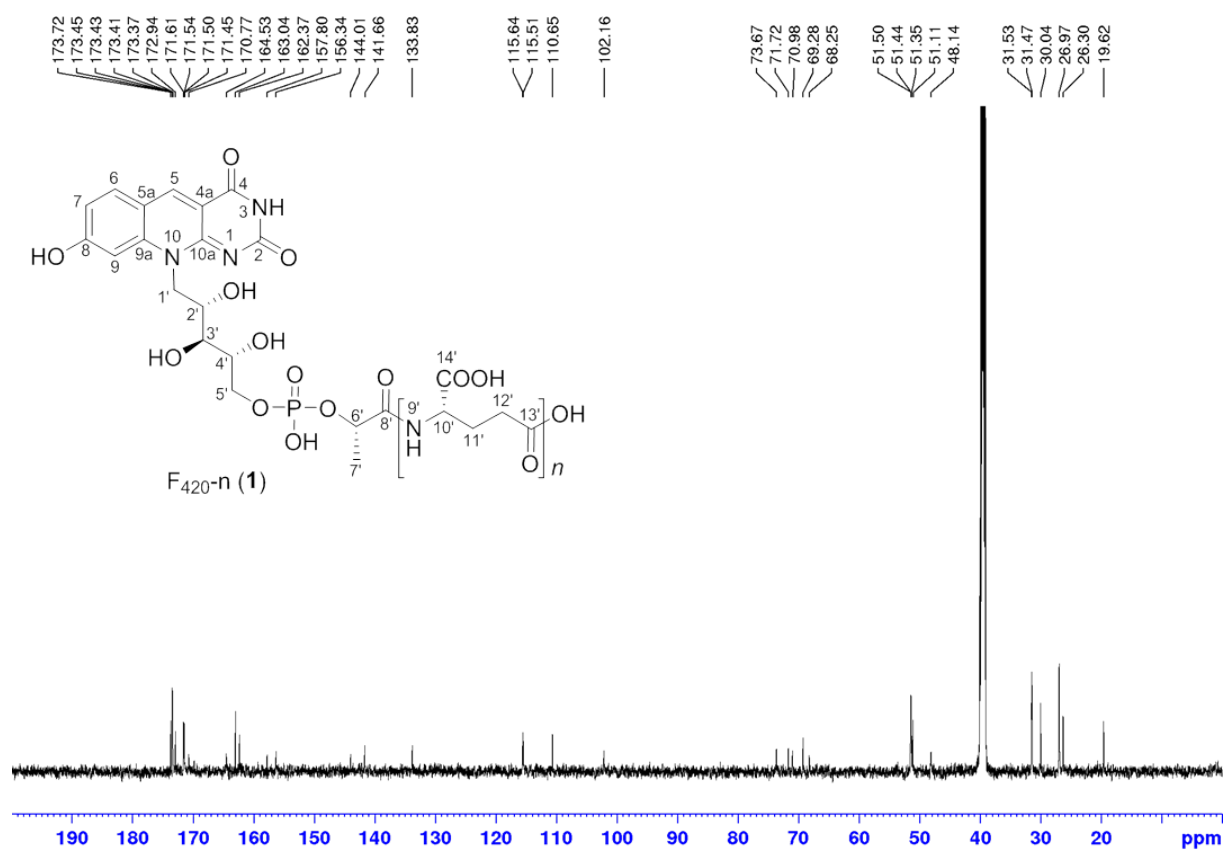

Figure S21.  $^{13}\text{C}$  NMR spectrum of  $F_{420-n}$  (DMSO- $d_6$ , 150 MHz, 300 K).

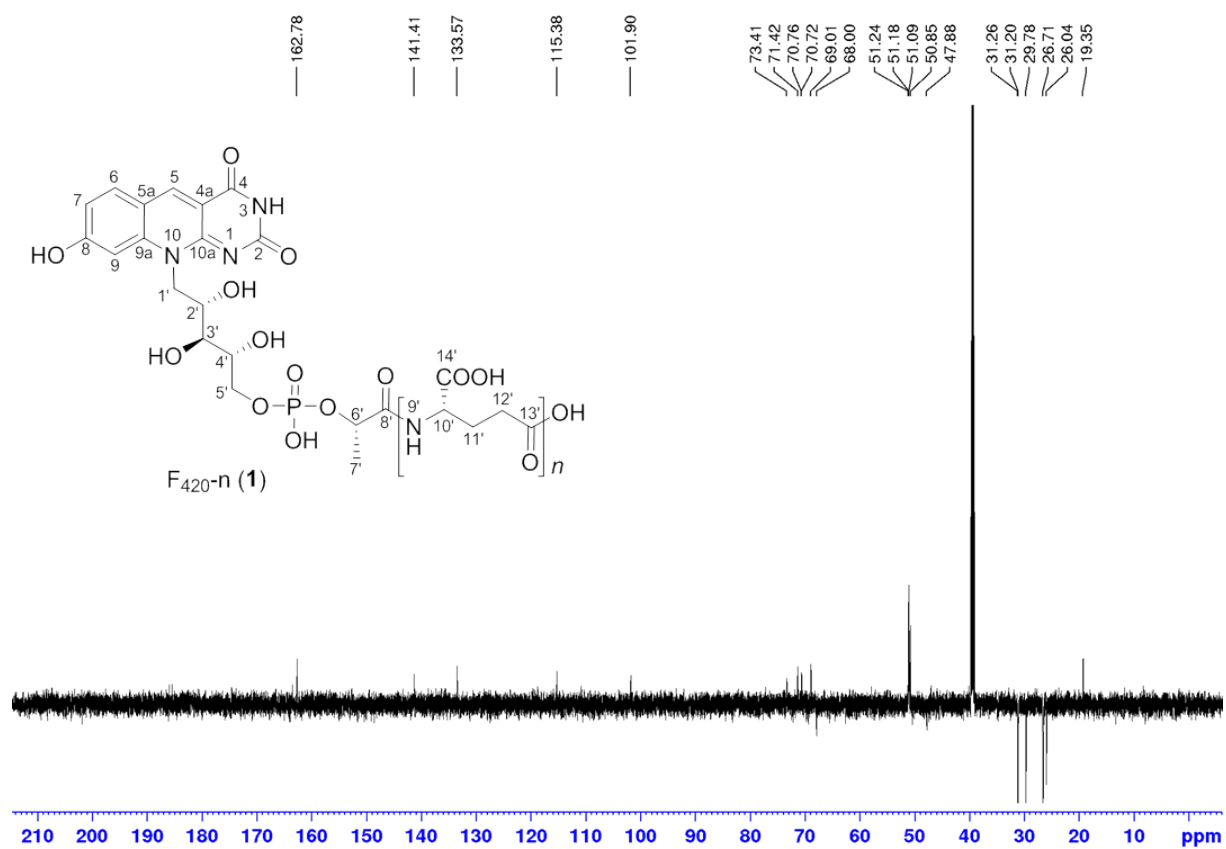

Figure S22. DEPT 135 spectrum of  $F_{420-n}$  (DMSO- $d_6$ , 150 MHz, 300 K).

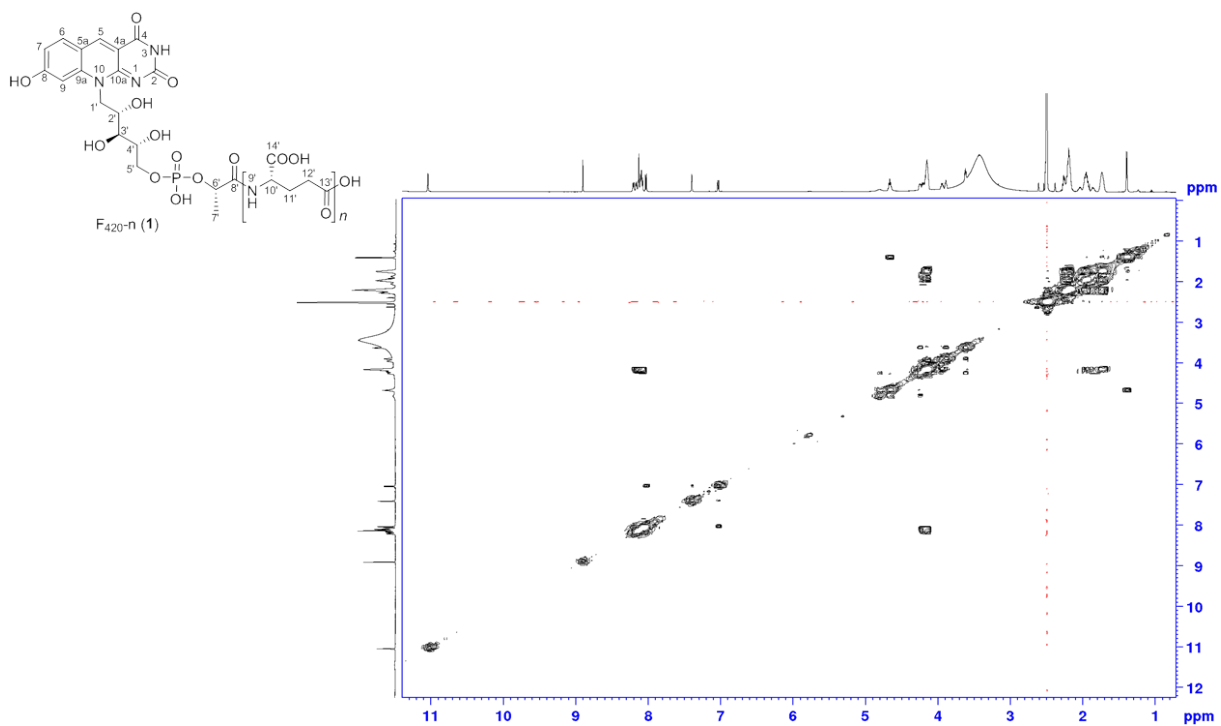

**Figure S23.**  $^1\text{H}$ - $^1\text{H}$  COSY spectrum of  $\text{F}_{420-n}$  ( $\text{DMSO-}d_6$ , 600 MHz, 300 K).

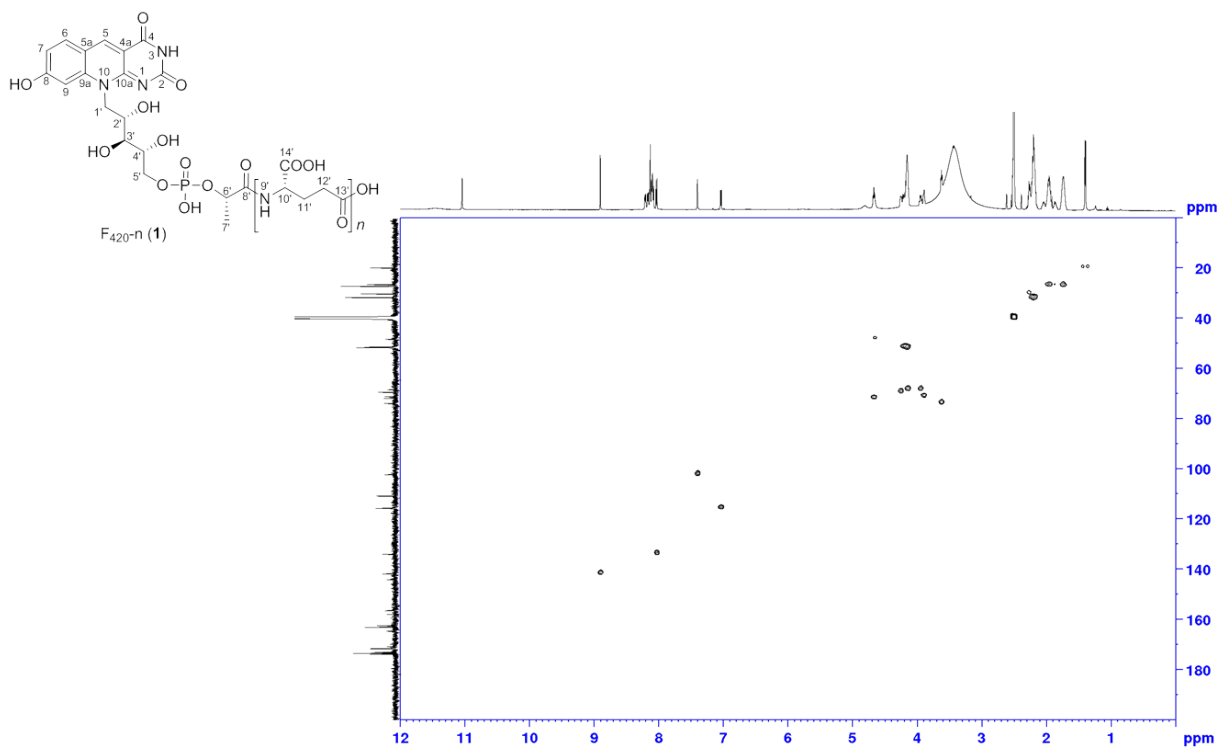

**Figure S24.**  $^1\text{H}$ - $^{13}\text{C}$  HSQC spectrum of  $\text{F}_{420-n}$  ( $\text{DMSO-}d_6$ , 600 MHz, 300 K).

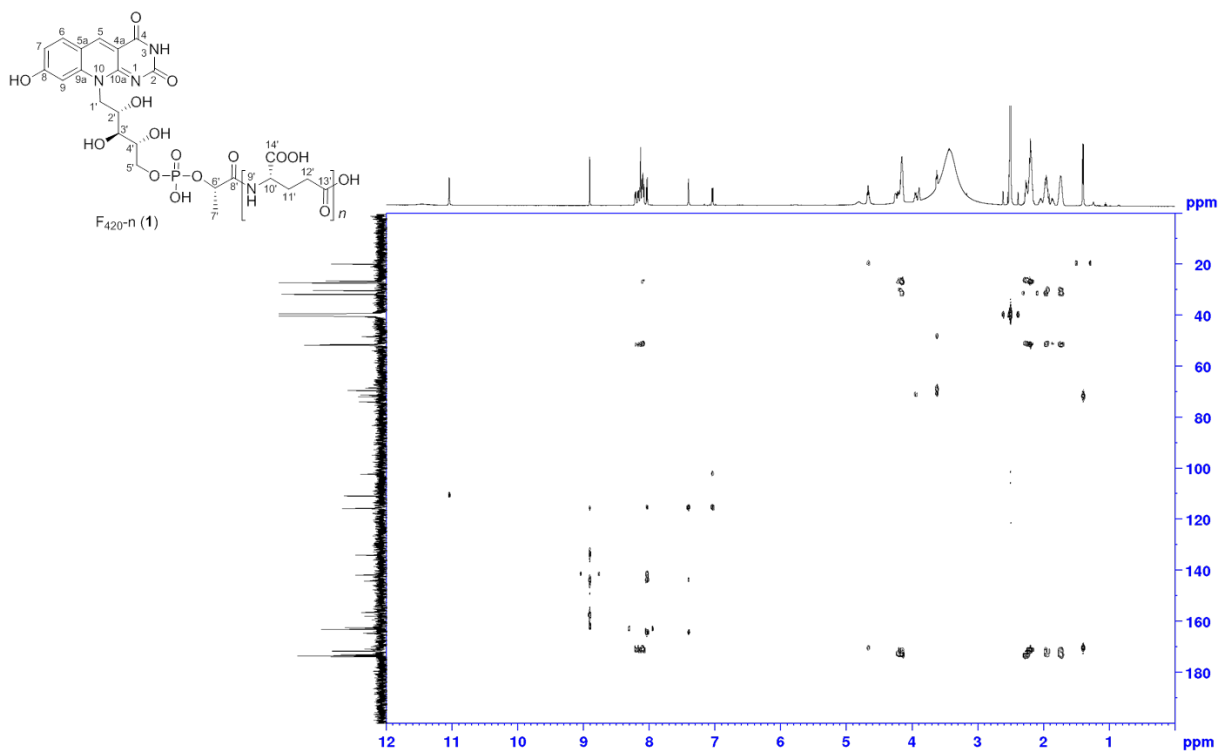

**Figure S25.**  $^1\text{H}$ - $^{13}\text{C}$  HMBC spectrum of  $\text{F}_{420}\text{-n}$  ( $\text{DMSO-}d_6$ , 600 MHz, 300 K).

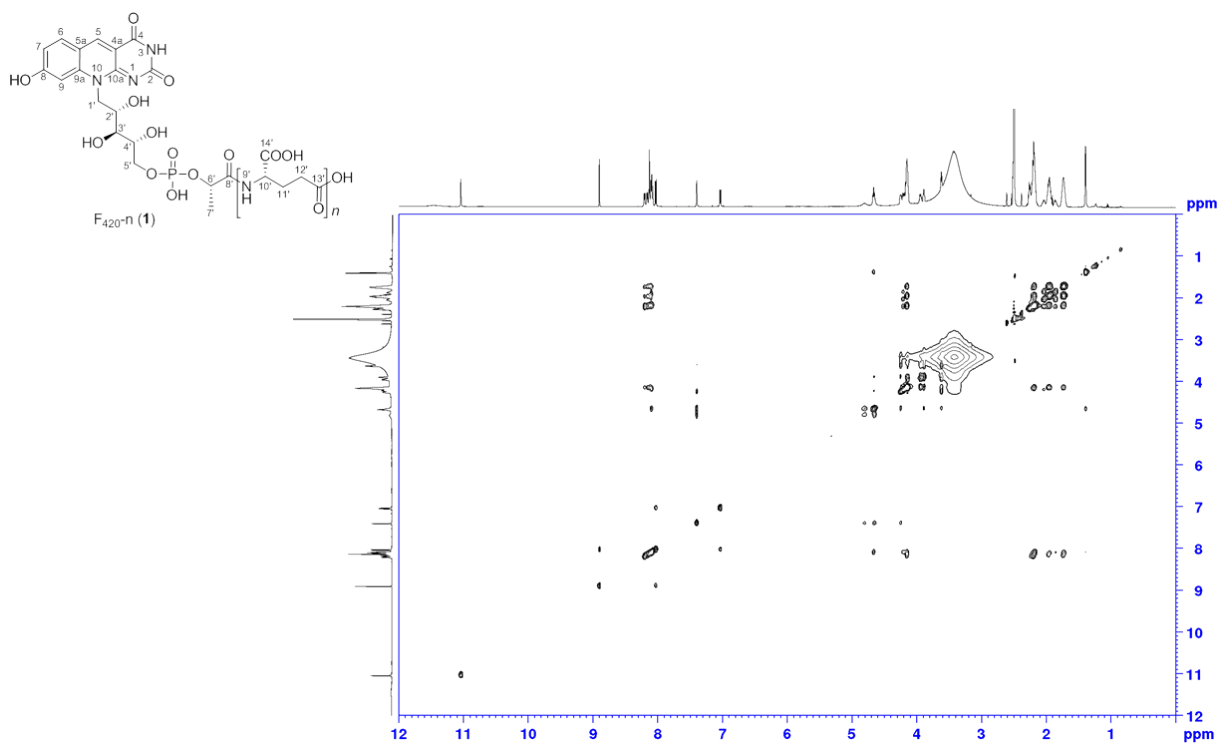

**Figure S26.** NOESY spectrum of  $\text{F}_{420}\text{-n}$  ( $\text{DMSO-}d_6$ , 600 MHz, 300 K).

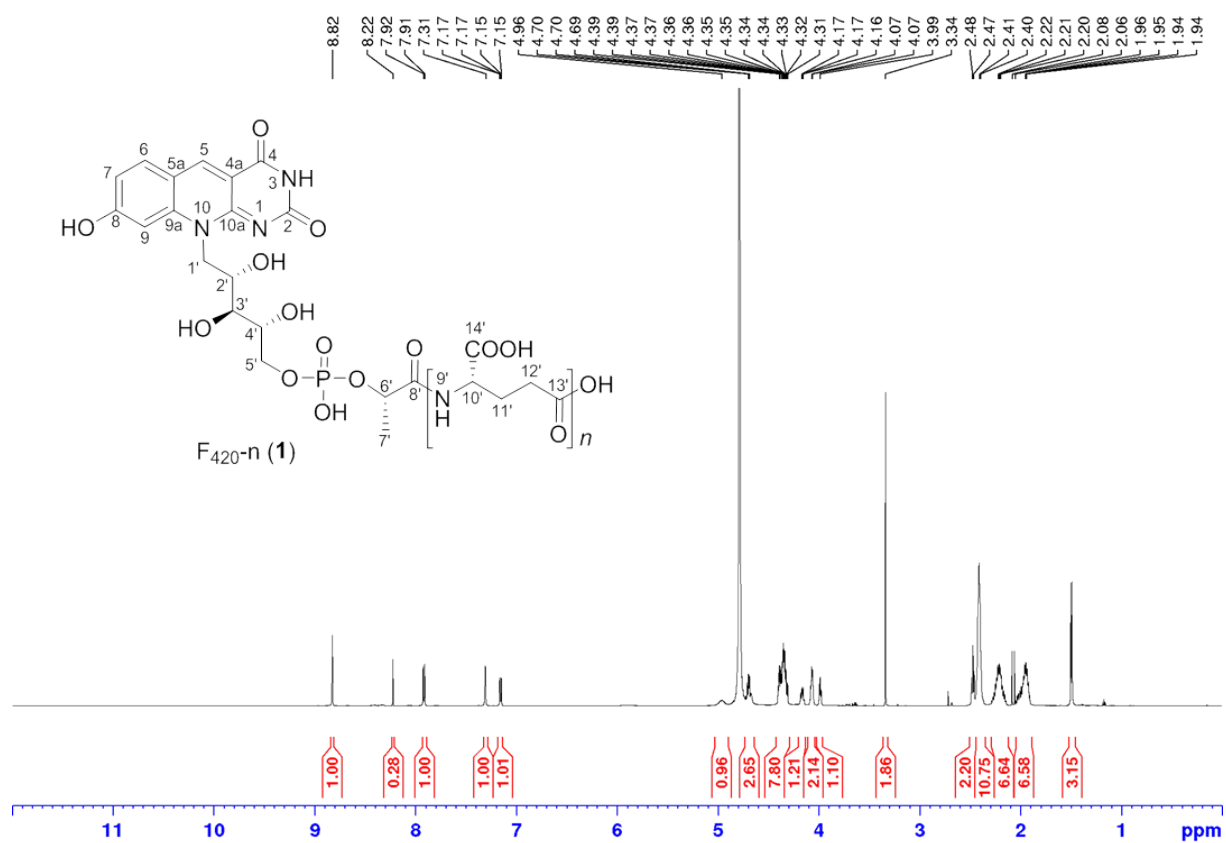

Figure S27. <sup>1</sup>H NMR spectrum of F<sub>420-n</sub> (D<sub>2</sub>O, 600 MHz, 300 K).

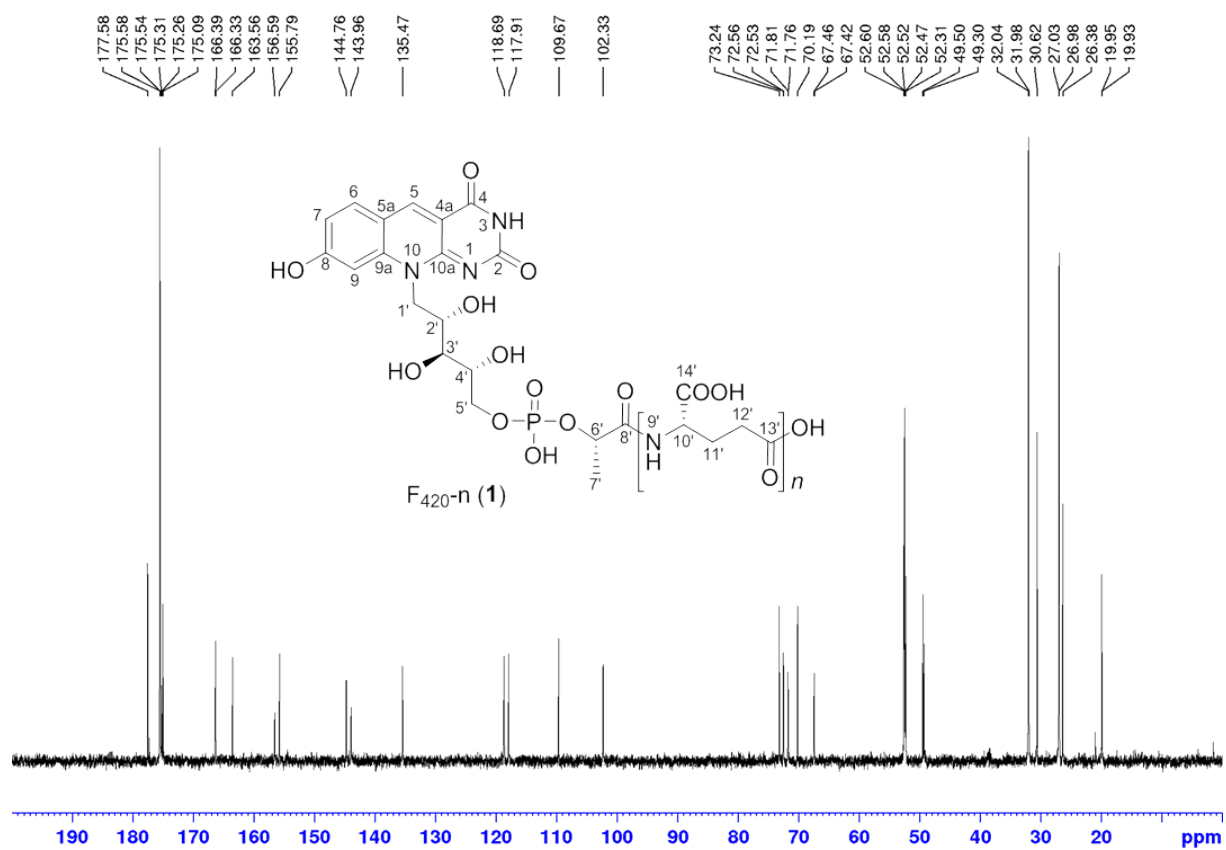

Figure S28. <sup>13</sup>C NMR spectrum of F<sub>420-n</sub> (D<sub>2</sub>O, 150 MHz, 300 K).

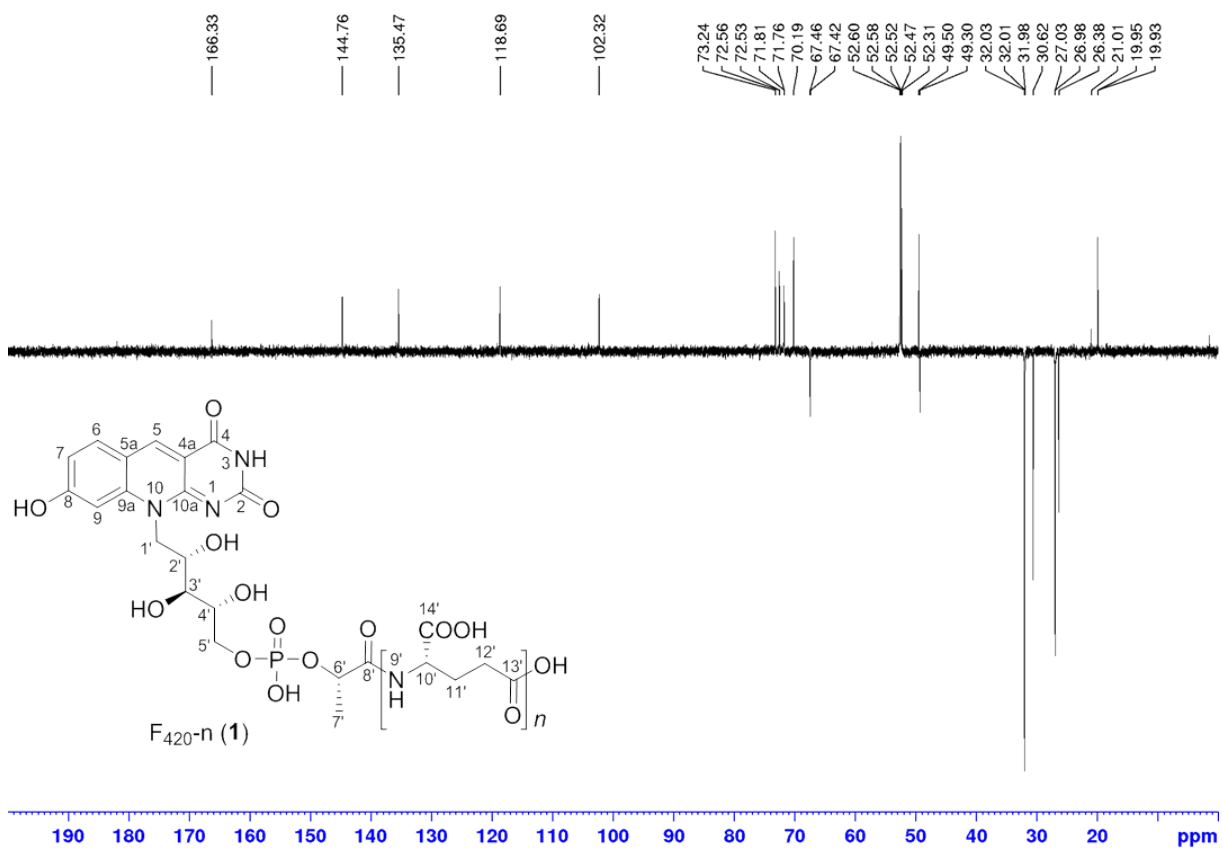

Figure S29. DEPT 135 spectrum of  $F_{420-n}$  ( $D_2O$ , 150 MHz, 300 K).

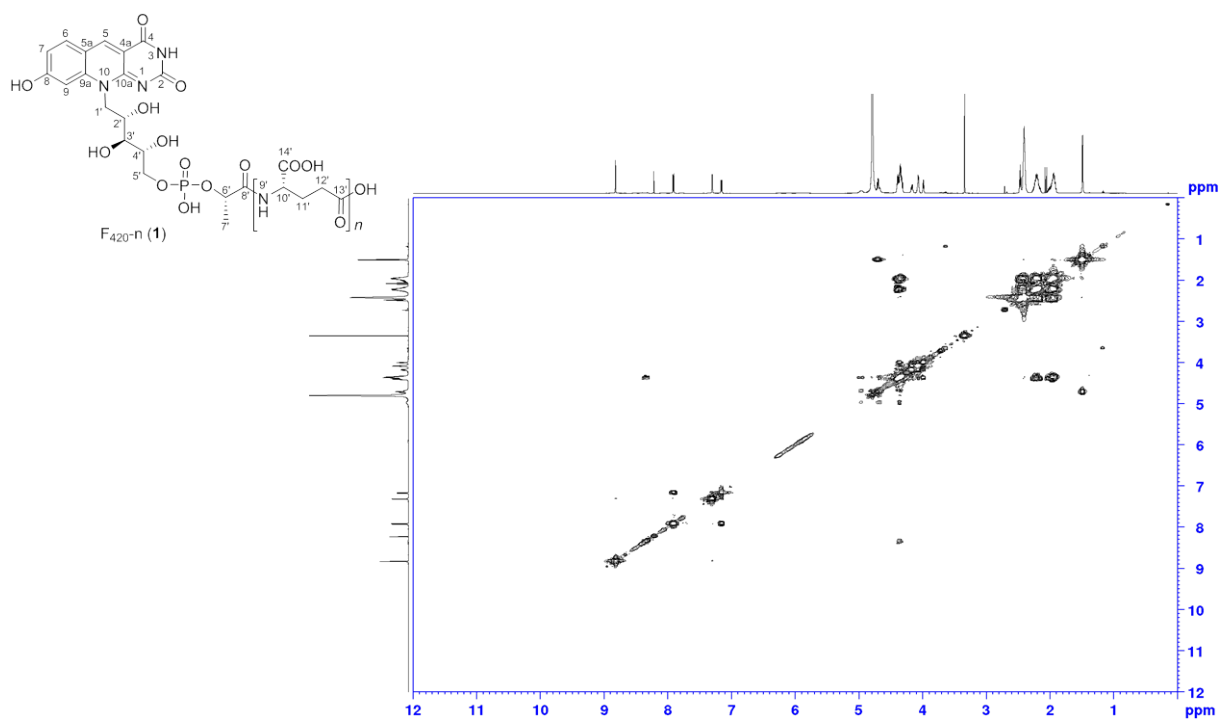

Figure S30.  $^1H$ - $^1H$  COSY spectrum of  $F_{420-n}$  ( $D_2O$ , 600 MHz, 300 K).



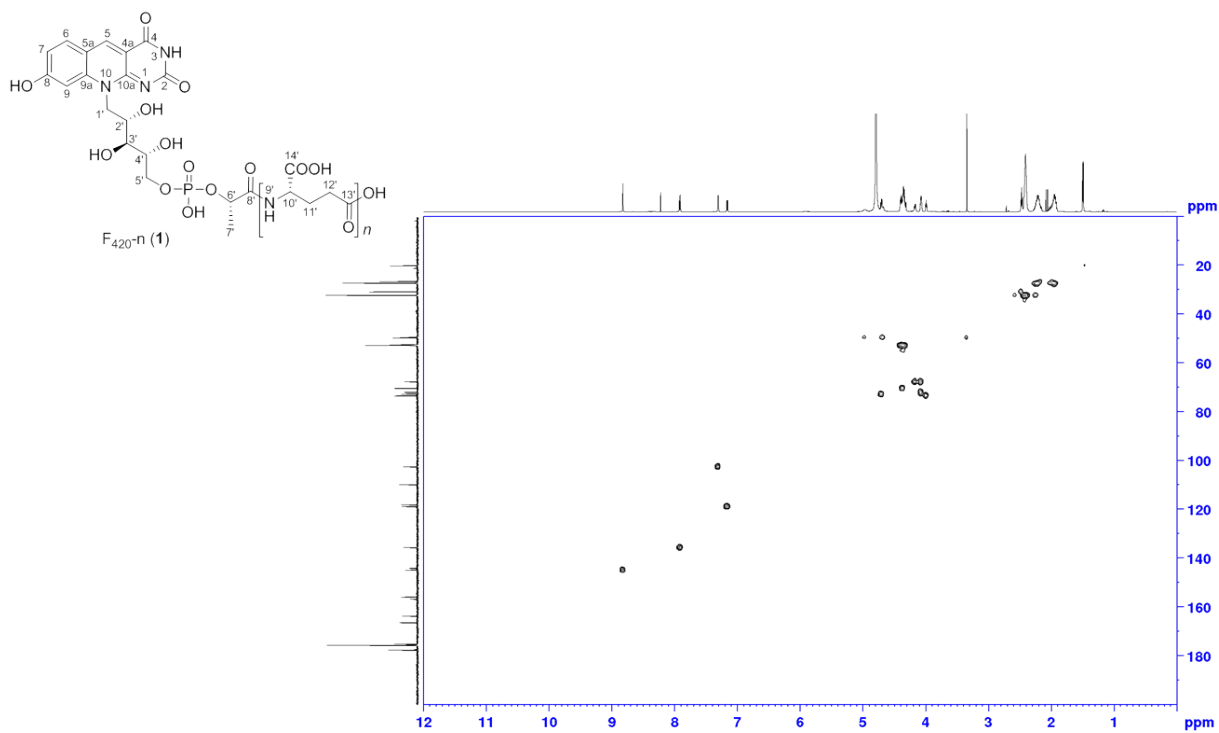

**Figure S31.**  $^1\text{H}$ - $^{13}\text{C}$  HSQC spectrum of  $\text{F}_{420\text{-}n}$  ( $\text{D}_2\text{O}$ , 600 MHz, 300 K).

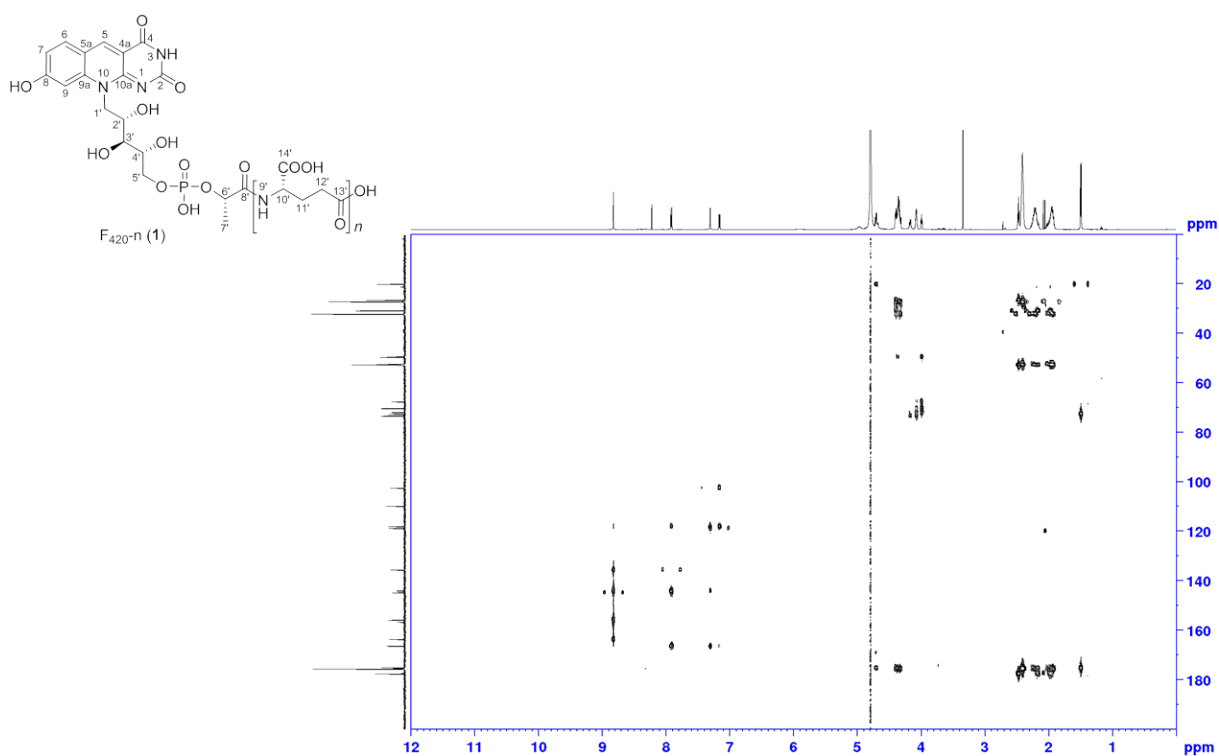

**Figure S32.**  $^1\text{H}$ - $^{13}\text{C}$  HMBC spectrum of  $\text{F}_{420\text{-}n}$  ( $\text{D}_2\text{O}$ , 600 MHz, 300 K).

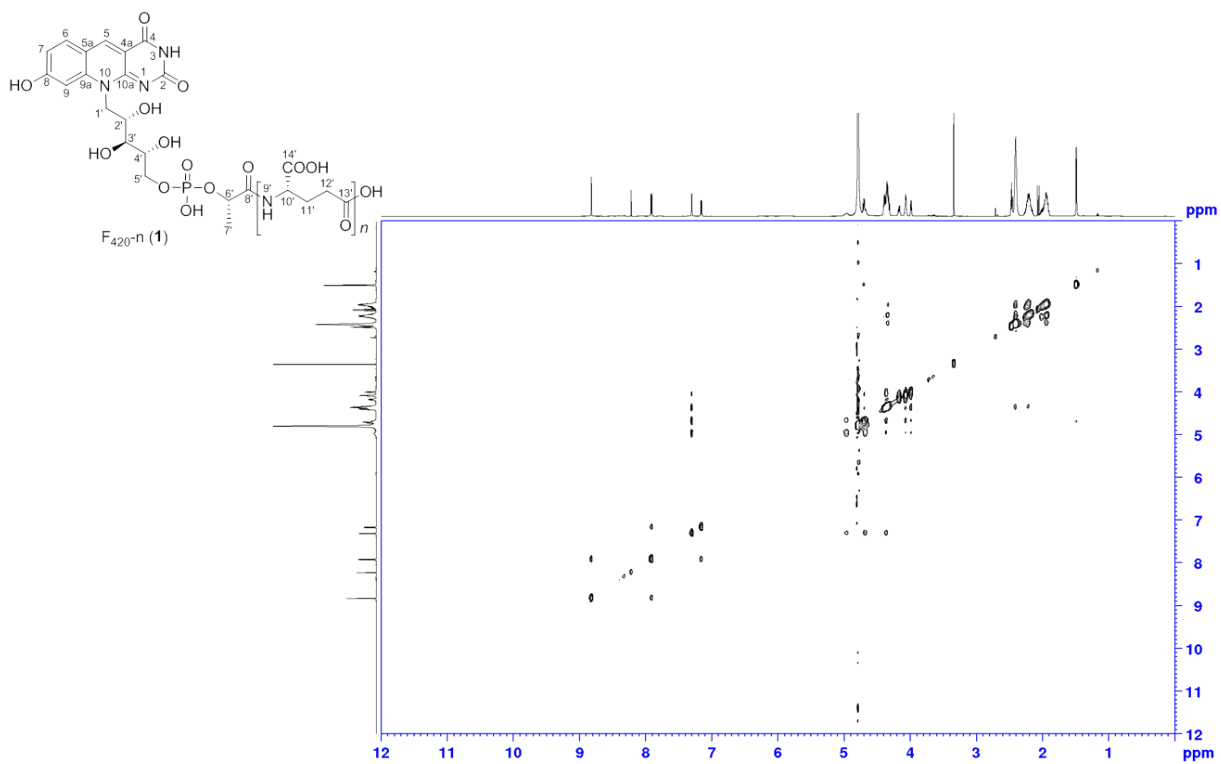

**Figure S33.** NOESY spectrum of F<sub>420</sub>-n (D<sub>2</sub>O, 600 MHz, 300 K).

### 2.3.2 Structure elucidation of 3PG-F<sub>420</sub>-0

3PG-F<sub>420</sub> species were isolated from large-scale fermentations of *E. coli* / pDB045 as described in Experimental Procedures (section 1.9). The elution from the anion-exchange column is depicted in Figure S34.

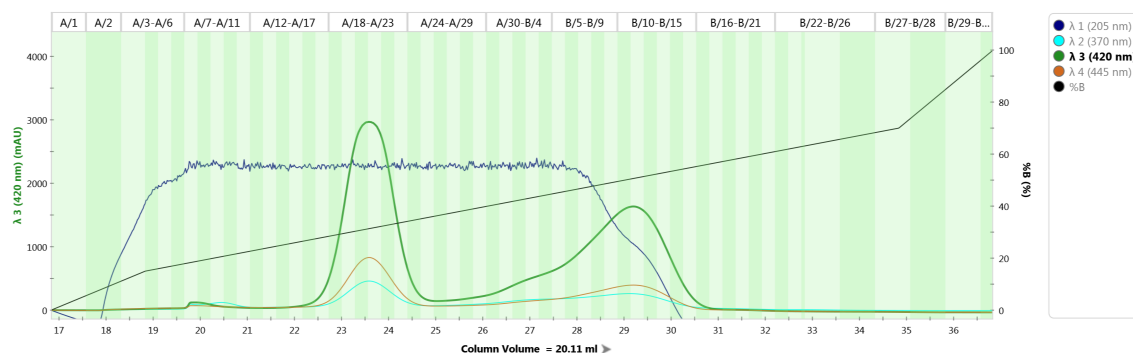

**Figure S34** Preparative ion exchange chromatography of *E. coli* / pDB045 lysate on a NGC Quest FPLC (Bio-Rad) equipped with a HiPrep QFF column (GE Healthcare) pre-equilibrated with sodium phosphate buffer (25mM, pH 7.4). A gradient of NaCl was used to elute different 3PG-F<sub>420</sub> species as peaks monitored by UV/VIS absorption at 420 nm (3PG-F<sub>420</sub>-0: 22.5 to 25 CV, 3PG-F<sub>420</sub>-n: 25-31 CV).

**3PG-F<sub>420</sub>-0 (5)** was obtained as golden yellow solid. Due to the solubility, 1D and 2D NMR spectra were recorded in 0.1% ND<sub>3</sub> in D<sub>2</sub>O. The molecular formula of 3PG-F<sub>420</sub>-0 (**5**) was determined as C<sub>19</sub>H<sub>22</sub>O<sub>13</sub>N<sub>3</sub>P based on the ESI-HRMS analysis ( $m/z$  532.09534 ( $[M+H]^+$  calcd. 532.09630  $\Delta = -1.81$  ppm) and <sup>1</sup>H and <sup>13</sup>C NMR spectra. Detailed comparison of the <sup>1</sup>H NMR and <sup>13</sup>C NMR spectra with classical F<sub>420</sub>-n revealed the similar structure feature of 5-deazaflavin moiety and the ribityl moiety, based on comparable <sup>13</sup>C resonance, with the slight chemical shift on the 5-deazaflavin moiety due to the ammonium salt and basic condition. The observation of a missing methyl group from the lactyl moiety and additional oxygenated methylene group ( $\delta_{H-7'}$  4.13/4.03 ppm,  $\delta_{C-7'}$  68.15 ppm) in 3PG-F<sub>420</sub>-0 (**5**), and the shift of oxymethine group ( $\delta_{H-6'}$  4.21 ppm,  $\delta_{C-6'}$  72.10 ppm) suggested the hydroxy group on the lactyl moiety. HMBC correlations of H-6' and H-7'a to C-8' further suggested the presence of a glyceryl moiety. The doublets of C-4', C-5', C-6' and C-7' indicated the <sup>13</sup>C-<sup>31</sup>P coupling ( $^3J_{C-4'-P} = 8.34$  Hz,  $^2J_{C-5'-P} = 5.56$  Hz,  $^3J_{C-6'-P} = 8.34$  Hz,  $^2J_{C-7'-P} = 5.37$  Hz) between the carbon atoms of the ribityl and glyceryl moieties assigned to these resonances and the phosphorus of the phosphate group. <sup>13</sup>C-<sup>31</sup>P coupling also suggested the presence of 3-phosphoglycerate, with the relatively smaller  $^2J_{C-P}$  and larger  $^3J_{C-P}$  value. This hypothesis was confirmed by the measurement of  $^2J_{C-P}$  and  $^3J_{C-P}$  value from 2-phosphoglycerate and 3-phosphoglycerate. The coupling constants of 3PG-F<sub>420</sub>-0(**5**) exactly matched to 3-phosphoglycerate, <sup>1</sup>H and <sup>13</sup>C chemical shift were similar. Therefore, the planar structure of 3PG-

F<sub>420</sub>-0 (**5**) is assigned as glyceric acid phosphodiester of 7,8-dedemethyl-8-hydroxy-5-deazariboflavin 5'-phosphate. (**Table S7** and **S8**)

**Spectral Data:** 3PG-F<sub>420</sub>-0 (**5**): golden yellow solid; UV (H<sub>2</sub>O, pH 7.5)  $\lambda_{\text{max}}$  250, 420 nm; IR (ATR)  $\nu_{\text{max}}$  3233, 2954, 2926, 2867, 2358, 2330, 1587, 1506, 1428, 1354, 1152, 1035, 853, 800 cm<sup>-1</sup>; NMR spectral data, see Table S7; ESI-HRMS [M+H]<sup>+</sup>  $m/z$  532.09534 (calcd. for C<sub>19</sub>H<sub>23</sub>O<sub>13</sub>N<sub>3</sub>P, 532.09630).

**Table S7.** NMR Data (0.1% ND<sub>3</sub> in D<sub>2</sub>O, at 300 K) for 3PG-F<sub>420</sub>-0 (**5**).<sup>a</sup>

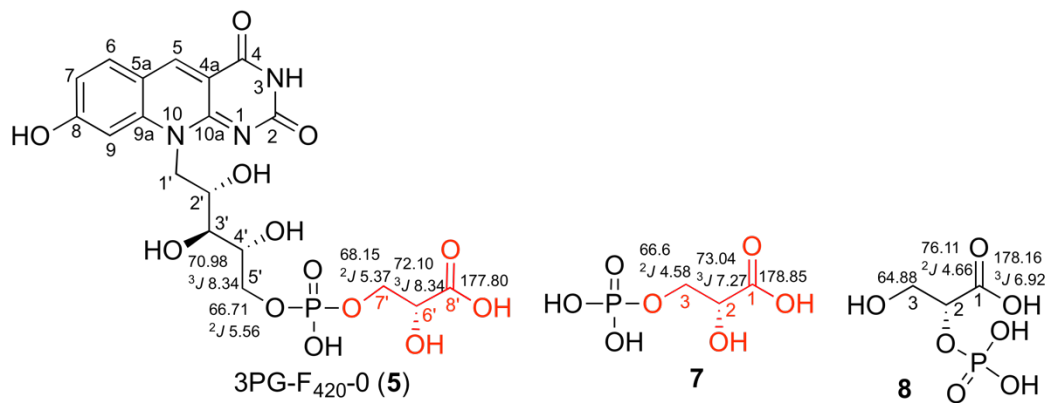

| 3PG-F <sub>420</sub> -0 ( <b>5</b> ) |                                                                |                                      |         |                |       |
|--------------------------------------|----------------------------------------------------------------|--------------------------------------|---------|----------------|-------|
| position                             | $\delta_C$ , mult. <sup>b</sup> ( <i>J</i> in Hz) <sup>c</sup> | $\delta_H$ , mult. ( <i>J</i> in Hz) | COSY    | HMBC           | NOESY |
| N (1)                                |                                                                |                                      |         |                |       |
| 2                                    | 159.33, qC                                                     |                                      |         |                |       |
| MH (3)                               |                                                                |                                      |         |                |       |
| 4                                    | 165.45, qC                                                     |                                      |         |                |       |
| 4a                                   | 104.13, qC                                                     |                                      |         |                |       |
| 5                                    | 140.80, CH                                                     | 8.56, s                              |         | 4, 6, 9a, 10a  |       |
| 5a                                   | 115.41, qC                                                     |                                      |         |                |       |
| 6                                    | 134.51, CH                                                     | 7.72, d (9.06)                       | 7       | 5, 5a, 9a, 8   |       |
| 7                                    | 123.52, CH                                                     | 6.82, d (8.98)                       | 6       | 5a, 9          |       |
| 8                                    | 179.48, qC                                                     |                                      |         |                |       |
| 9                                    | 102.74, CH                                                     | 6.77, s                              |         | 5a, 7, 9a, 8   |       |
| 9a                                   | 145.56, qC                                                     |                                      |         |                |       |
| 10                                   |                                                                |                                      |         |                |       |
| 10a                                  | 157.75, qC                                                     |                                      |         |                |       |
| 1'a                                  | 46.31, CH <sub>2</sub>                                         | 5.07, br s                           | 1'b, 2' |                |       |
| 1'b                                  |                                                                | 4.56, br d (13.14)                   | 1'a     |                |       |
| 2'                                   | 69.31, CH                                                      | 4.41, m                              | 1'b, 3' |                |       |
| 3'                                   | 72.54, CH                                                      | 3.96, m                              | 2', 4'  | 1', 2', 4', 5' |       |
| 4'                                   | 70.98, CH, d (8.34)                                            | 4.03, m                              | 3'      | 2'             |       |
| 5'a                                  | 66.71, CH <sub>2</sub> , d (5.56)                              | 4.13, m                              | 5'b     | 3'             |       |
| 5'b                                  |                                                                | 4.03, m                              | 5'a     | 3', 4'         |       |
| 6'                                   | 72.10, CH, d (8.34)                                            | 4.21, m                              | 7'b     | 8'             |       |
| 7'                                   | 68.15, CH <sub>2</sub> , d (5.37)                              | 4.13, m                              | 7'b     | 8'             |       |
|                                      |                                                                | 4.03, m                              | 6, 7'a  |                |       |
| 8'                                   | 177.80, qC                                                     |                                      |         |                |       |

<sup>a</sup> 600 MHz for <sup>1</sup>H NMR and 150 MHz for <sup>13</sup>C NMR

<sup>b</sup> numbers of attached protons were determined by analysis of 2D spectra

<sup>c</sup> coupling constant indicated <sup>13</sup>C-<sup>31</sup>P coupling

**Table S8.** NMR Data (0.1% ND<sub>3</sub> in D<sub>2</sub>O, at 300 K) for 3-phospho-D-glyceric acid (**7**) and 2-phospho-D-glyceric acid (**8**).

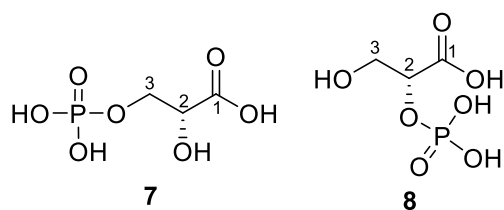

|          | 3-phospho-d-glyceric acid ( <b>7</b> )                    |                                 | 2-phospho-D-glyceric acid ( <b>8</b> )                    |                                 |
|----------|-----------------------------------------------------------|---------------------------------|-----------------------------------------------------------|---------------------------------|
| position | $\delta_C$ , mult. <sup>b</sup> ( $J$ in Hz) <sup>c</sup> | $\delta_H$ , mult. ( $J$ in Hz) | $\delta_C$ , mult. <sup>b</sup> ( $J$ in Hz) <sup>c</sup> | $\delta_H$ , mult. ( $J$ in Hz) |
| 1        | 178.85, qC, s                                             |                                 | 178.16, qC, d (6.92)                                      |                                 |
| 2        | 73.04, CH, d (7.07)                                       | 4.18, dd (6.64, 2.70)           | 76.11, CH, d (4.66)                                       | 4.47, dd (5.81, 2.86)           |
| 3a       | 66.65, CH <sub>2</sub> , d (4.58)                         | 4.02, ddd (11.07, 6.14, 2.79)   | 64.88, CH <sub>2</sub> , s                                | 3.90, dd (11.62, 5.81)          |
| 3b       |                                                           | 3.86, ddd (11.20, 6.57,         |                                                           | 3.79, dd (11.62, 3.02)          |

<sup>a</sup> 600 MHz for <sup>1</sup>H NMR and 150 MHz for <sup>13</sup>C NMR

<sup>b</sup> numbers of attached protons were determined by analysis of 2D spectra.

<sup>c</sup> coupling constant indicated <sup>13</sup>C-<sup>31</sup>P coupling

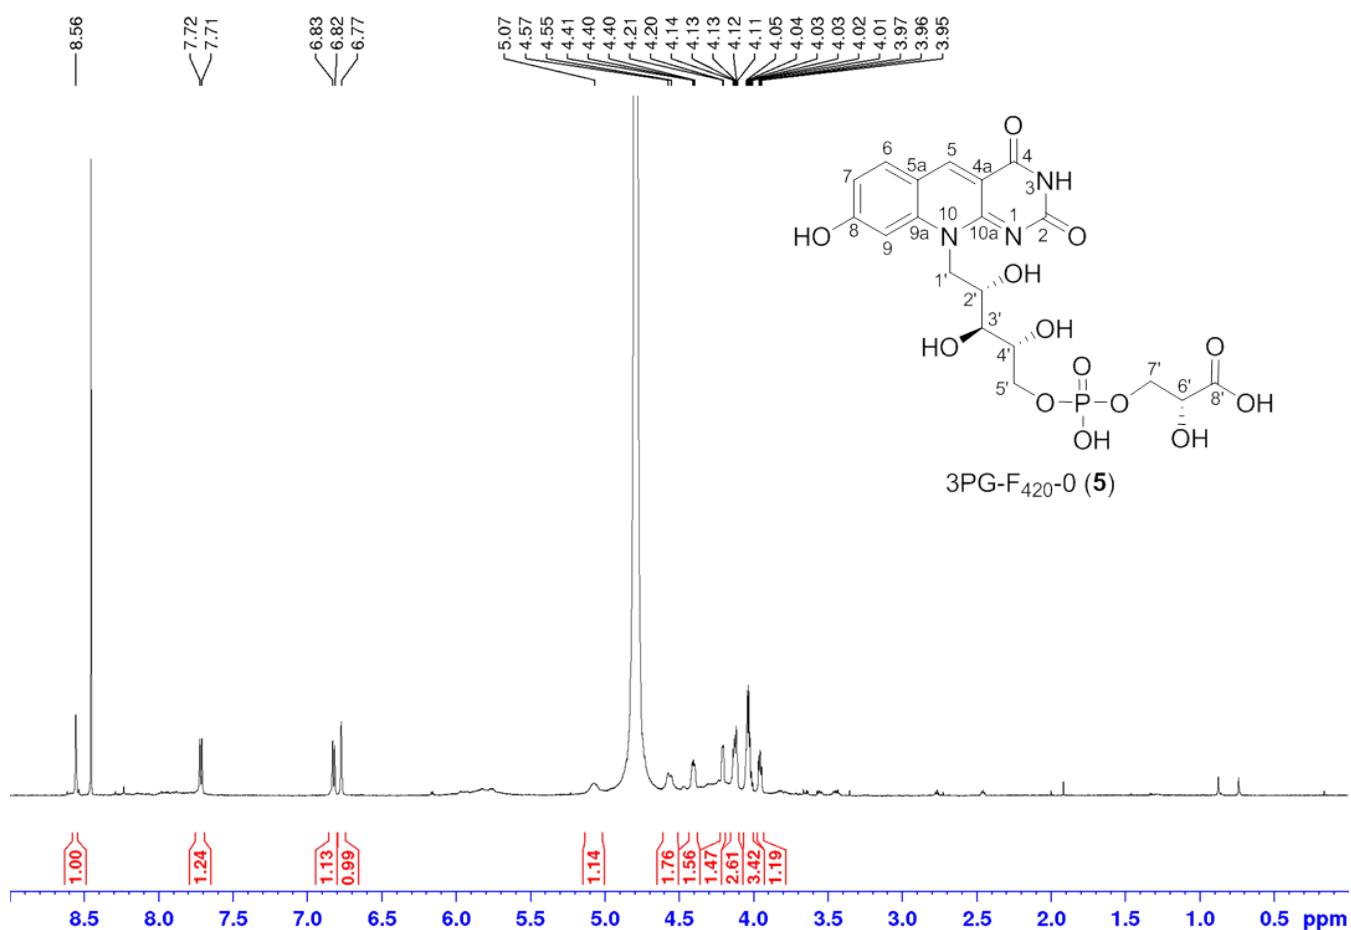

**Figure S35.** <sup>1</sup>H NMR spectrum of 3PG-F<sub>420</sub>-0 (**5**) (0.1% ND<sub>3</sub> in D<sub>2</sub>O, 600 MHz, 300 K).

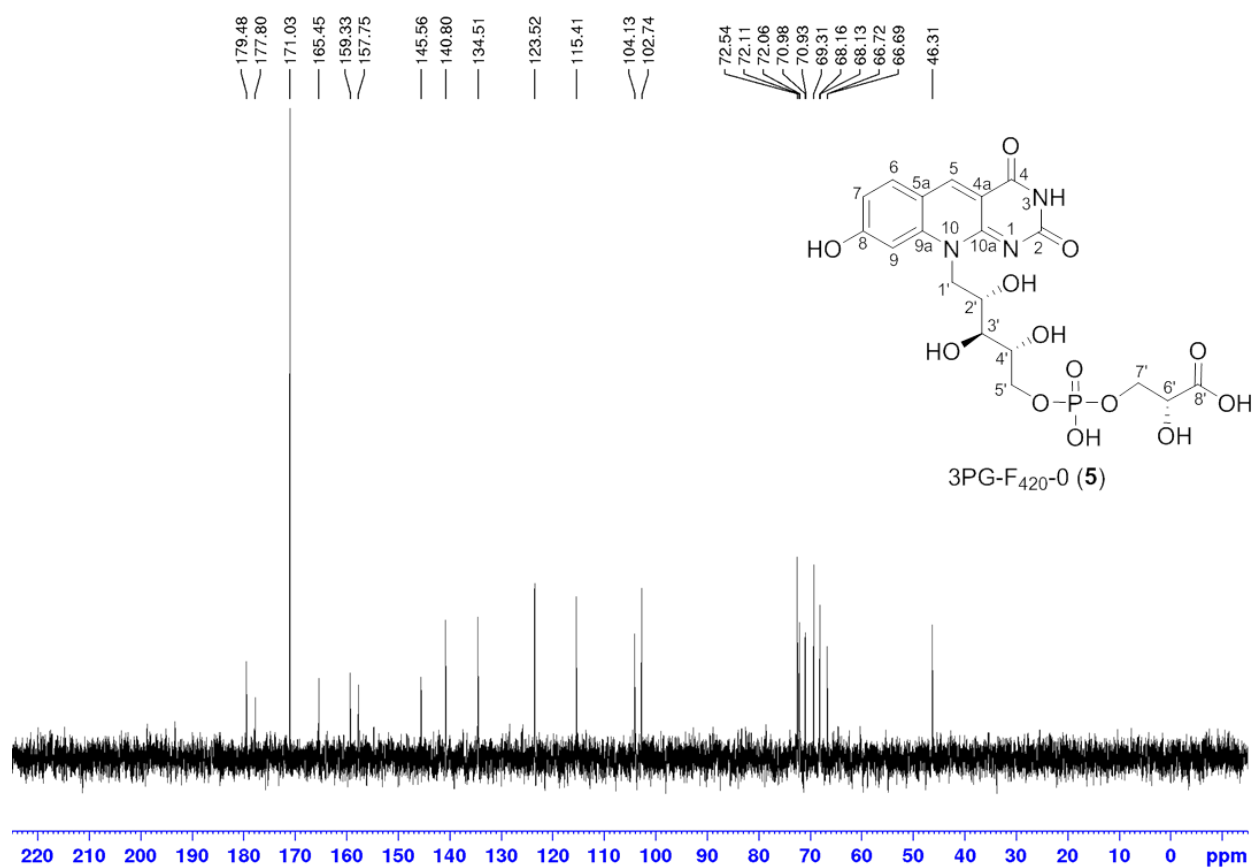

Figure S36. <sup>13</sup>C NMR spectrum of 3PG-F<sub>420</sub>-0 (5) (0.1% ND<sub>3</sub> in D<sub>2</sub>O, 150 MHz, 300 K).

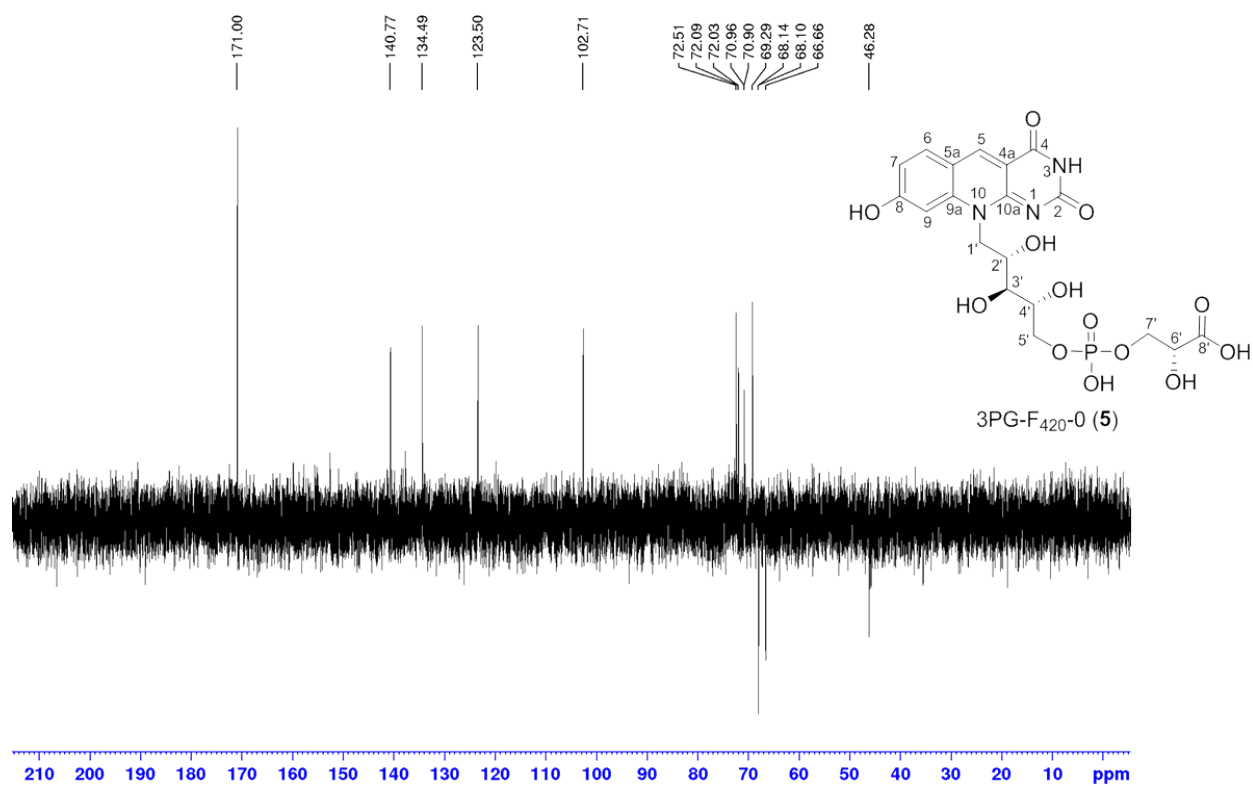

Figure S37. DEPT 135 spectrum of 3PG-F<sub>420</sub>-0 (5) (0.1% ND<sub>3</sub> in D<sub>2</sub>O, 150 MHz, 300 K).

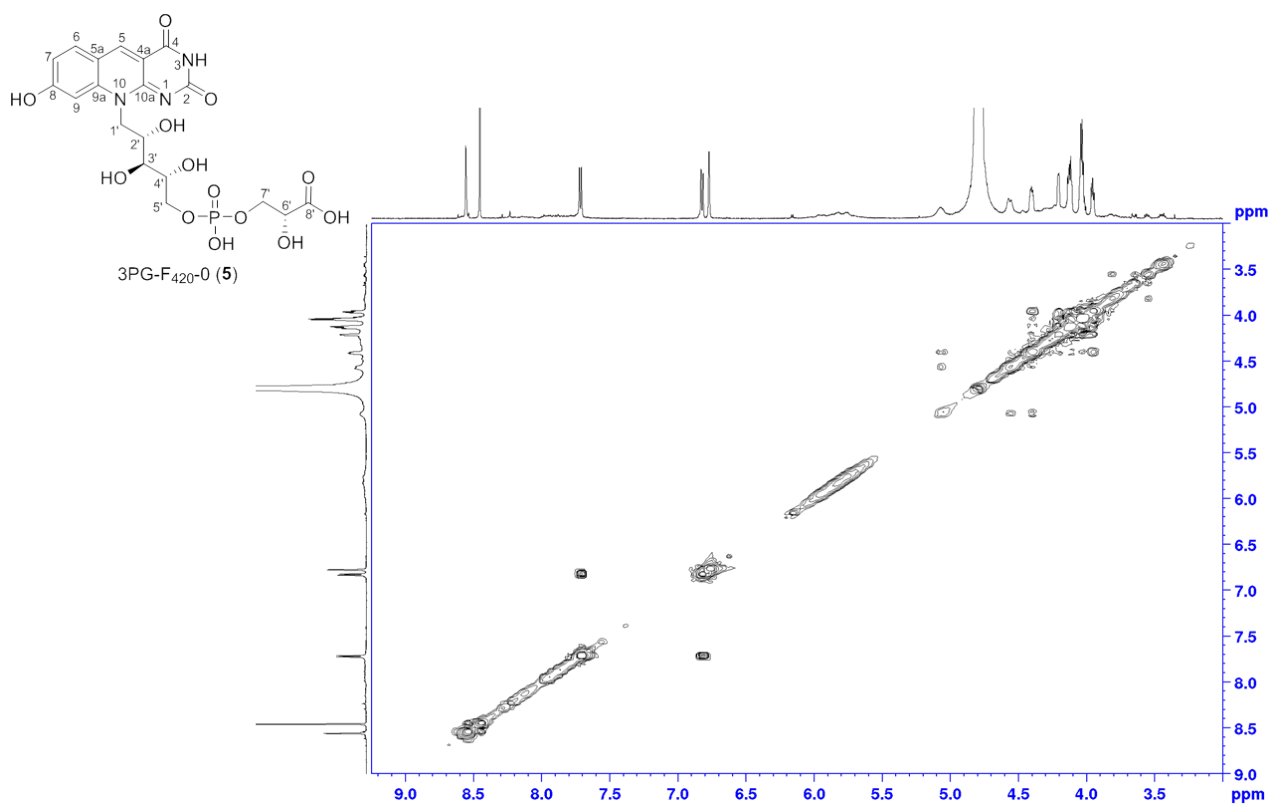

**Figure S38.**  $^1\text{H}$ - $^1\text{H}$  COSY spectrum of 3PG-F<sub>420</sub>-0 (**5**) (0.1% ND<sub>3</sub> in D<sub>2</sub>O, 600 MHz, 300 K).

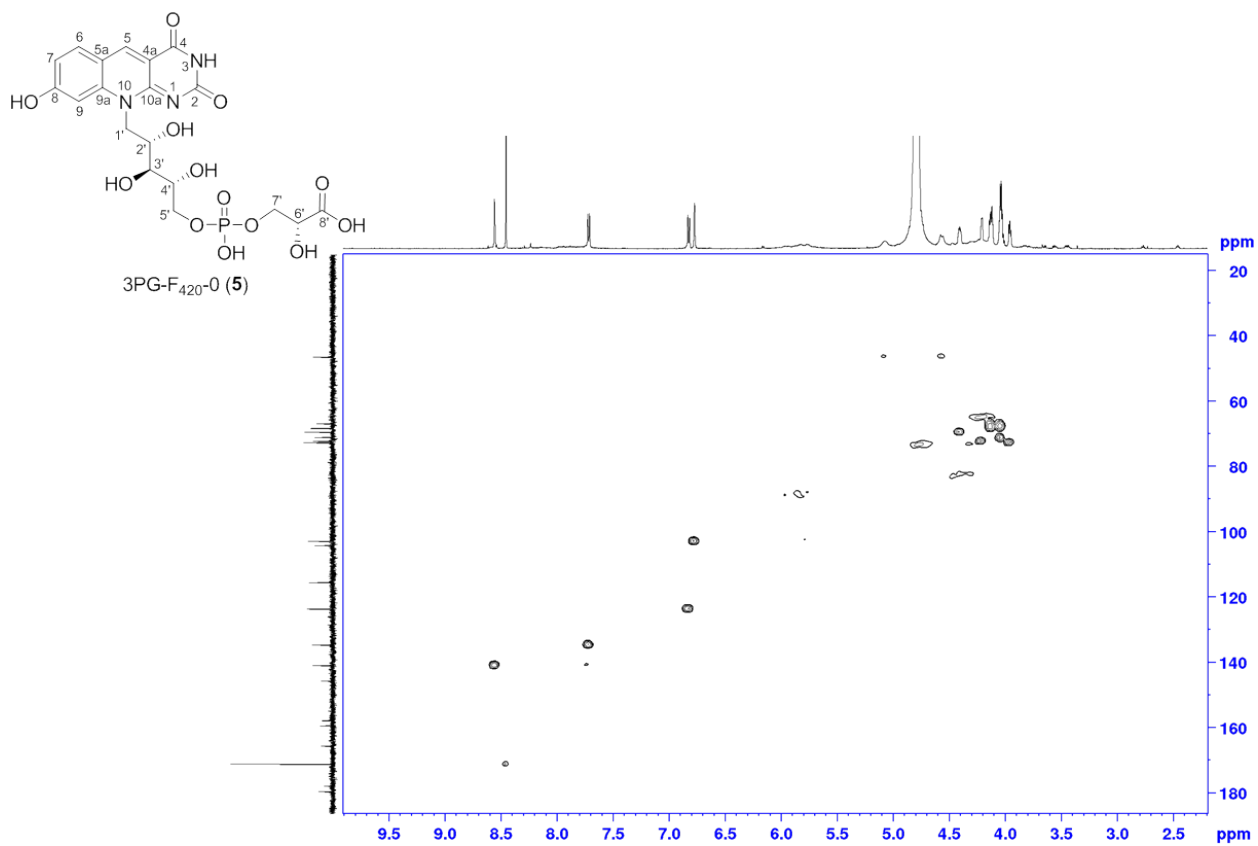

**Figure S39.**  $^1\text{H}$ - $^{13}\text{C}$  HSQC spectrum of 3PG-F<sub>420</sub>-0 (**5**) (0.1% ND<sub>3</sub> in D<sub>2</sub>O, 600 MHz, 300 K).



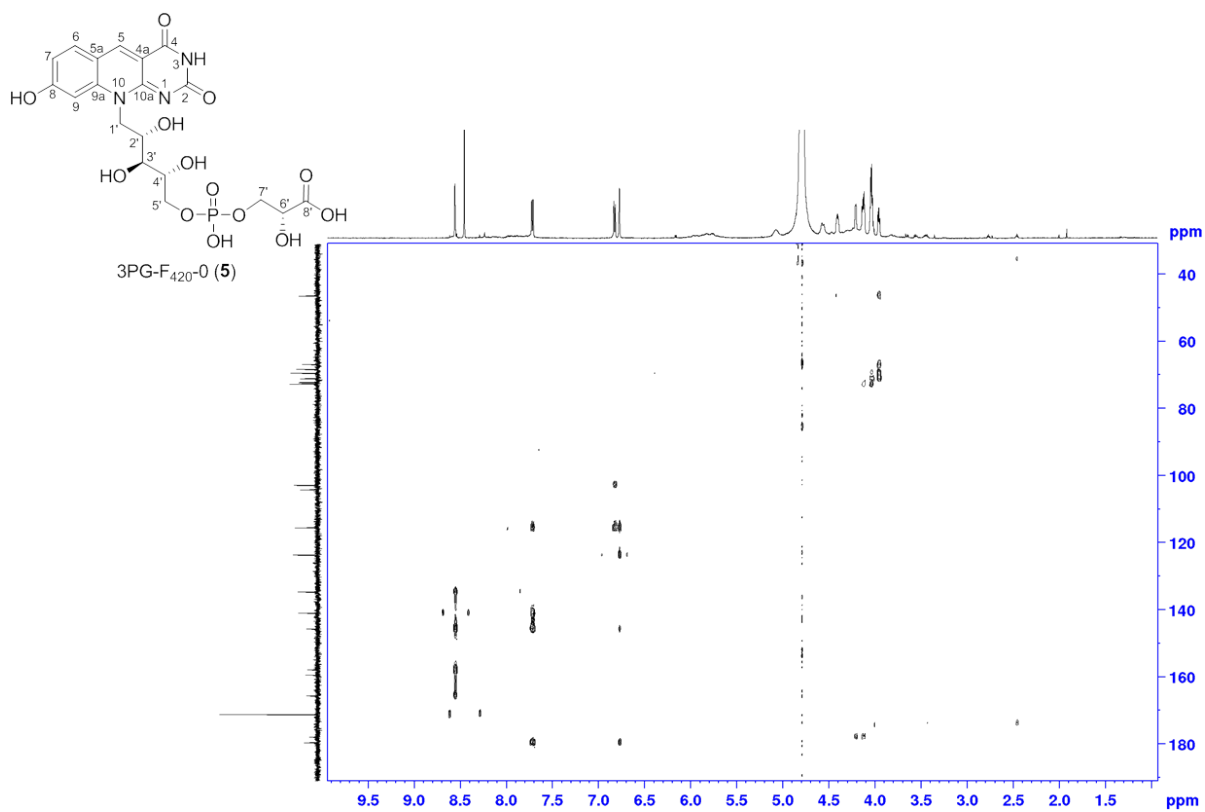

**Figure S40.**  $^1\text{H}$ - $^{13}\text{C}$  HMBC spectrum of 3PG-F<sub>420</sub>-0 (**5**) (0.1% ND<sub>3</sub> in D<sub>2</sub>O, 600 MHz, 300 K).

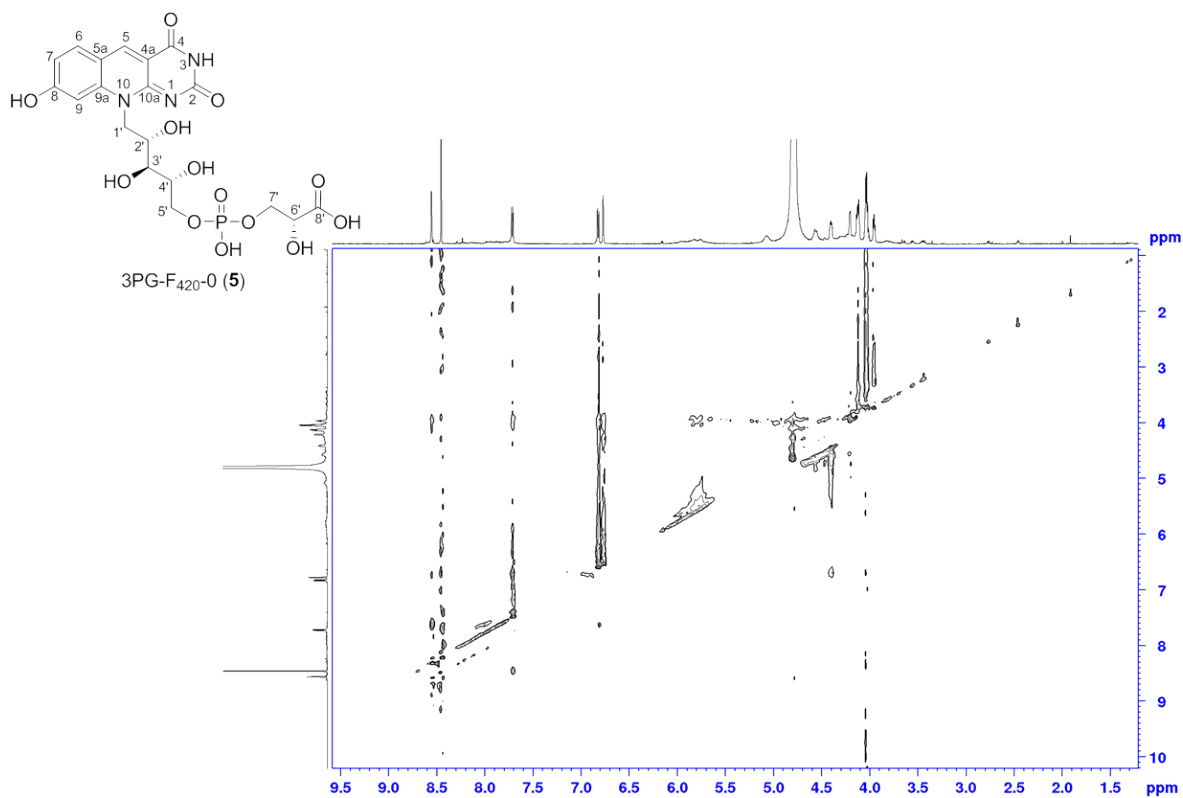

**Figure S41.** NOESY spectrum of 3PG-F<sub>420</sub>-0 (**5**) (0.1% ND<sub>3</sub> in D<sub>2</sub>O, 600 MHz, 300 K).

HJ1024#1030 RT: 3.86 AV: 1 NL: 4.74E6  
T: FTMS + cESI Fullms [150.0000-2000.0000]

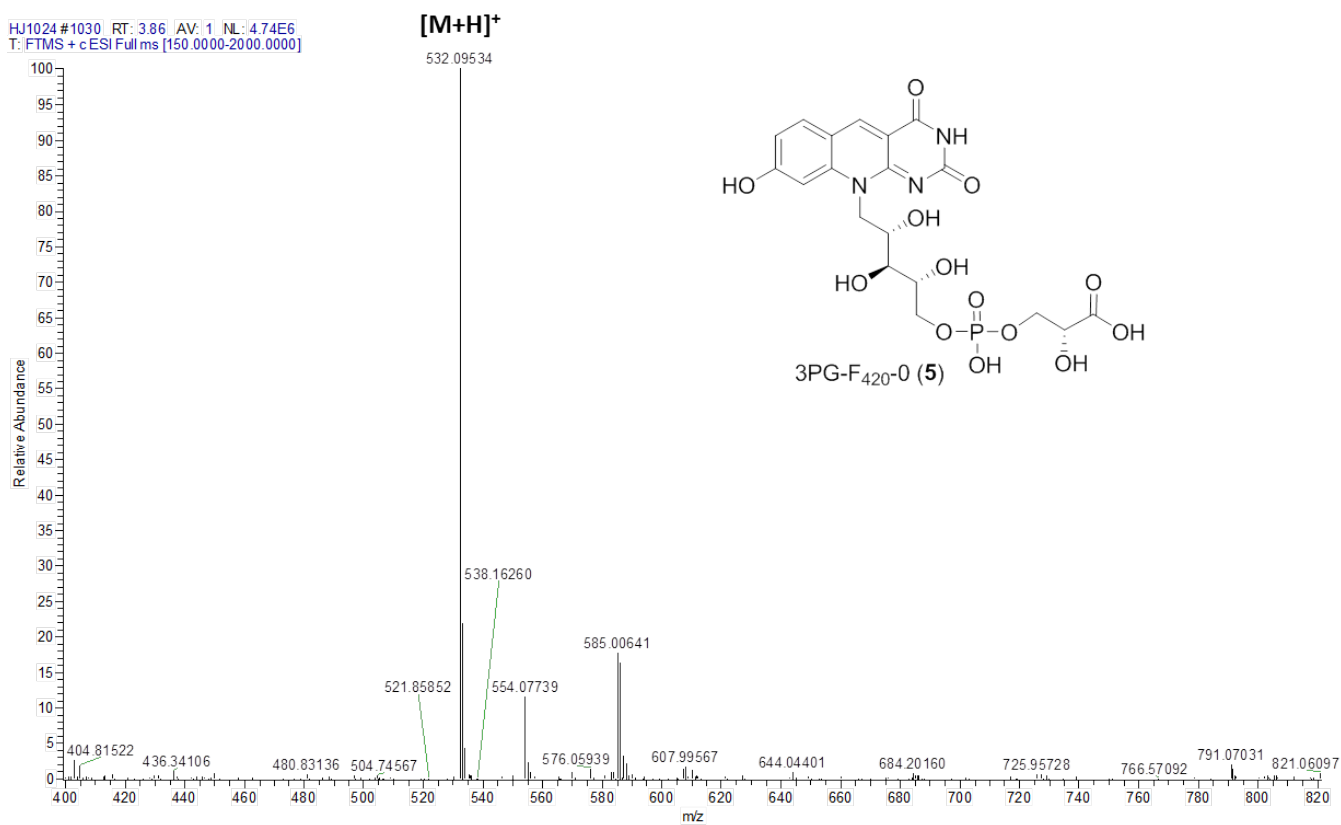

Figure S42. ESI-HRMS spectrum of 3PG-F<sub>420</sub>-0 (5).

### 2.3.3 Structure elucidation of 3PG-F<sub>420-n</sub>

**3PG-F<sub>420-n</sub> (4):** 3PG-F<sub>420-n</sub> was obtained as golden yellow solid. 1D and 2D NMR spectra were recorded in 0.1% ND<sub>3</sub> in D<sub>2</sub>O as well. The composition of mixed 3PG-F<sub>420-n</sub> was determined as 3PG-F<sub>420-1</sub> with the molecular formula of C<sub>24</sub>H<sub>29</sub>O<sub>16</sub>N<sub>4</sub>P based on the ESI-HRMS analysis ( $m/z$  661.13757 ([M+H]<sup>+</sup> calcd. 661.13889  $\Delta = -2.00$  ppm); 3PG-F<sub>420-2</sub> with the molecular formula of C<sub>29</sub>H<sub>36</sub>O<sub>19</sub>N<sub>5</sub>P based on the ESI-HRMS analysis ( $m/z$  790.17981 ([M+H]<sup>+</sup> calcd. 790.18149  $\Delta = -2.12$  ppm); 3PG-F<sub>420-3</sub> with the molecular formula of C<sub>34</sub>H<sub>43</sub>O<sub>22</sub>N<sub>6</sub>P based on the ESI-HRMS analysis ( $m/z$  919.22223 ([M+H]<sup>+</sup> calcd. 919.22408  $\Delta = -2.01$  ppm); 3PG-F<sub>420-4</sub> with the molecular formula of C<sub>39</sub>H<sub>50</sub>O<sub>25</sub>N<sub>7</sub>P based on the ESI-HRMS analysis ( $m/z$  1048.26489 ([M+H]<sup>+</sup> calcd. 1048.26667  $\Delta = -1.70$  ppm); 3PG-F<sub>420-5</sub> with the molecular formula of C<sub>44</sub>H<sub>57</sub>O<sub>28</sub>N<sub>8</sub>P based on the ESI-HRMS analysis ( $m/z$  1177.30750 ([M+H]<sup>+</sup> calcd. 1177.30927  $\Delta = -1.50$  ppm); 3PG-F<sub>420-6</sub> with the molecular formula of C<sub>49</sub>H<sub>64</sub>O<sub>31</sub>N<sub>9</sub>P based on the ESI-HRMS analysis ( $m/z$  1306.34961 ([M+H]<sup>+</sup> calcd. 1306.35186  $\Delta = -1.72$  ppm). Detailed comparison of <sup>1</sup>H NMR data of 3PG-F<sub>420-n</sub> with 3PG-F<sub>420-0</sub> (**5**) and F<sub>420-n</sub> revealed the signals from glutamyl moiety ( $\delta_{\text{H}}$  1.86–2.35 ppm;  $\delta_{\text{H}}$  4.25–4.25 ppm).

**Spectral Data:** 3PG-F<sub>420-n</sub>: golden yellow solid; UV (H<sub>2</sub>O, pH 7.5)  $\lambda_{\text{max}}$  250, 420 nm; IR (ATR)  $\nu_{\text{max}}$  3738, 3339, 2926, 2356, 1678, 1581, 1512, 1365, 1206, 1181, 1138, 1014, 841, 805, 769 722, 664 cm<sup>-1</sup>;

**Table S9.** NMR Data (0.1% ND<sub>3</sub> in D<sub>2</sub>O, at 300 K) for 3PG-F<sub>420-n</sub>.<sup>a</sup>

| position             | 3PG-F <sub>420-n</sub>                                         |                                      |            |                    |       |
|----------------------|----------------------------------------------------------------|--------------------------------------|------------|--------------------|-------|
|                      | $\delta_C$ , mult. <sup>b</sup> ( <i>J</i> in Hz) <sup>c</sup> | $\delta_H$ , mult. ( <i>J</i> in Hz) | COSY       | HMBC               | NOESY |
| NH (1)               |                                                                |                                      |            |                    |       |
| 2                    | 159.37, qC                                                     |                                      |            |                    |       |
| NH (3)               |                                                                |                                      |            |                    |       |
| 4                    | 165.59, qC                                                     |                                      |            |                    |       |
| 4a                   | 104.29, qC                                                     |                                      |            |                    |       |
| 5                    | 140.93, CH                                                     | 8.61, s                              |            | 4, 6, 9a, 10a      | 6     |
| 5a                   | 115.47, qC                                                     |                                      |            |                    |       |
| 6                    | 134.55, CH                                                     | 7.75, d (8.50)                       | 7          | 5, 8, 9a           | 5, 7  |
| 7                    | 123.50, CH                                                     | 6.84, d (8.60)                       | 6          | 5a, 9              | 5     |
| 8                    | 179.45, qC                                                     |                                      |            |                    |       |
| 9                    | 102.75, CH                                                     | 6.80, s                              |            | 5a, 7, 9a          |       |
| 9a                   | 145.63, qC                                                     |                                      |            |                    |       |
| 10                   |                                                                |                                      |            |                    |       |
| 10a                  | 157.86, qC                                                     |                                      |            |                    |       |
| 1'a                  | 46.37, CH <sub>2</sub>                                         | 5.09, br s                           | 1'b, 2'    |                    |       |
| 1'b                  |                                                                | 4.61, d (13.24)                      | 1'a        |                    |       |
| 2'                   | 69.40, CH                                                      | 4.41, m                              | 1'a, 3'    |                    |       |
| 3'                   | 72.60, CH                                                      | 3.95, t (5.12)                       | 2'         | 1', 2', 4', 5'     |       |
| 4'                   | 70.94, CH <sub>2</sub> , d, (7.81)                             | 4.04, m                              |            |                    |       |
| 5'a                  | 66.95, CH <sub>2</sub> , d, (4.82)                             | 4.13, m                              |            |                    |       |
| 5'b                  |                                                                | 4.01, m                              |            |                    |       |
| 6'                   | 71.12, CH d, (8.60)                                            | 4.42, br s                           | 7'a        | 8'                 |       |
| 7'a                  | 66.85, CH <sub>2</sub> , d, (3.82)                             | 4.13, m                              | 6'         | 8'                 |       |
| 7'b                  |                                                                | 4.01, m                              |            |                    |       |
| 8'                   | 172.86, qC                                                     |                                      |            |                    |       |
| NH (9') <sup>d</sup> |                                                                |                                      |            |                    |       |
| 10' <sup>d</sup>     | 53.64, CH                                                      | 4.32, m                              | 11'a, 11'b | 8', 11', 12'       |       |
| 11'a <sup>d</sup>    | 27.86, CH <sub>2</sub>                                         | 2.04, m                              | 10', 11b'  | 10', 12', 13', 14' |       |
| 11'b <sup>d</sup>    |                                                                | 1.91, m                              | 10', 11'a  | 10', 12', 13', 14' |       |
| 12'a <sup>d</sup>    | 33.57, CH <sub>2</sub>                                         | 2.28, m                              |            | 10', 11', 13'      |       |
| 12'b                 |                                                                | 2.22, m                              |            | 10', 11', 13'      |       |
| 13' <sup>d</sup>     | 181.56, qC                                                     |                                      |            |                    |       |
| 14' <sup>d</sup>     | 173.63, qC                                                     |                                      |            |                    |       |

<sup>a</sup> 600 MHz for <sup>1</sup>H NMR and 150 MHz for <sup>13</sup>C NMR

<sup>b</sup> numbers of attached protons were determined by analysis of 2D spectra.

<sup>c</sup> coupling constant indicated <sup>13</sup>C-<sup>31</sup>P coupling

<sup>d</sup> NMR resonance are overlapped in the five times glutamate chains and only one unit was presented.

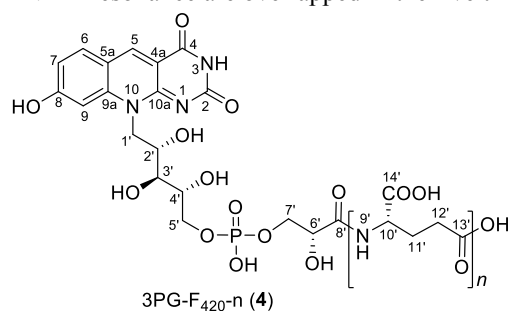

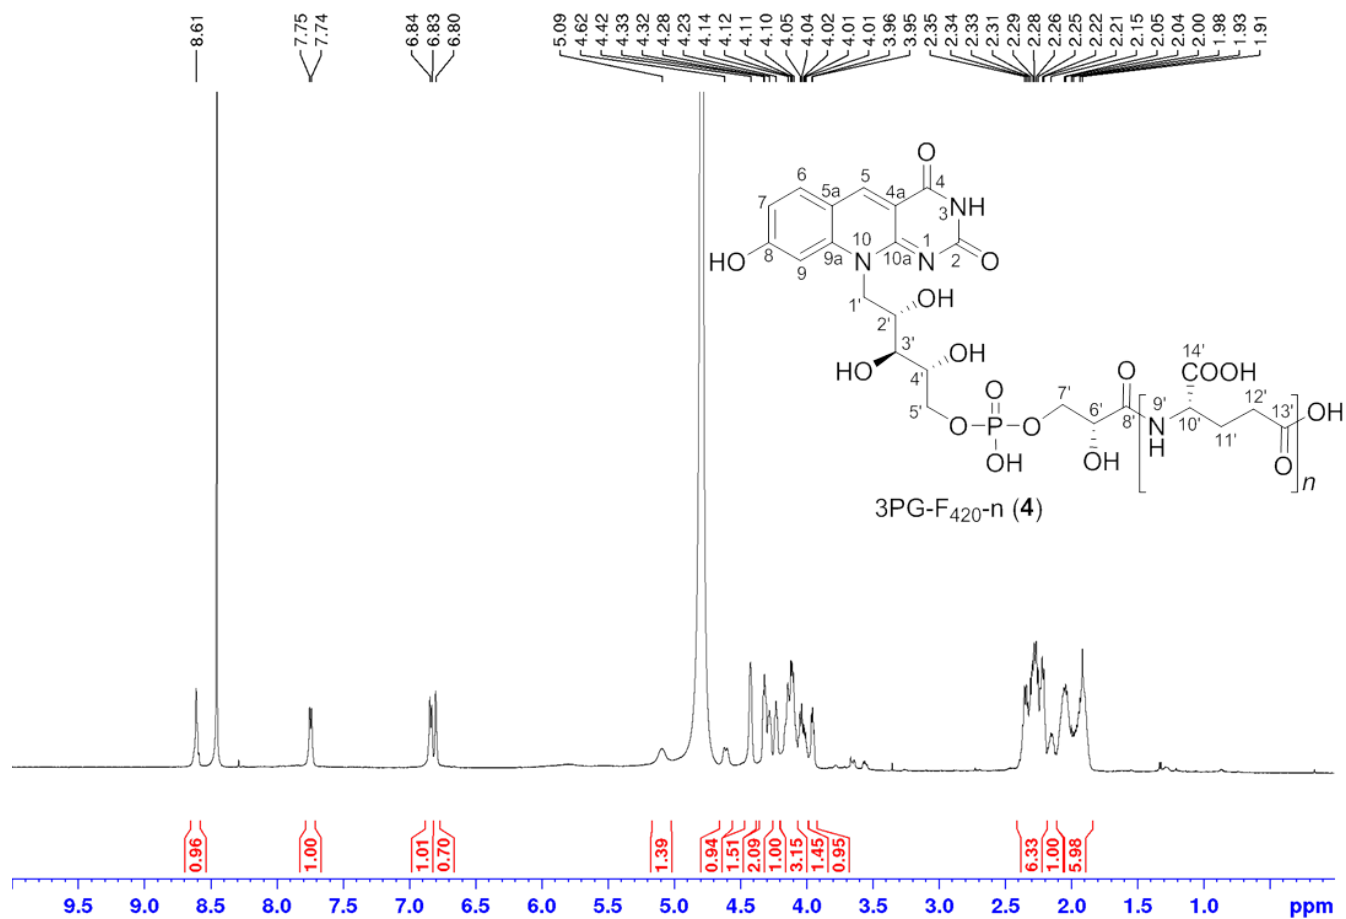

Figure S43. <sup>1</sup>H NMR spectrum of 3PG-F<sub>420-n</sub> (4, 0.1% ND<sub>3</sub> in D<sub>2</sub>O, 300 MHz, 300 K).

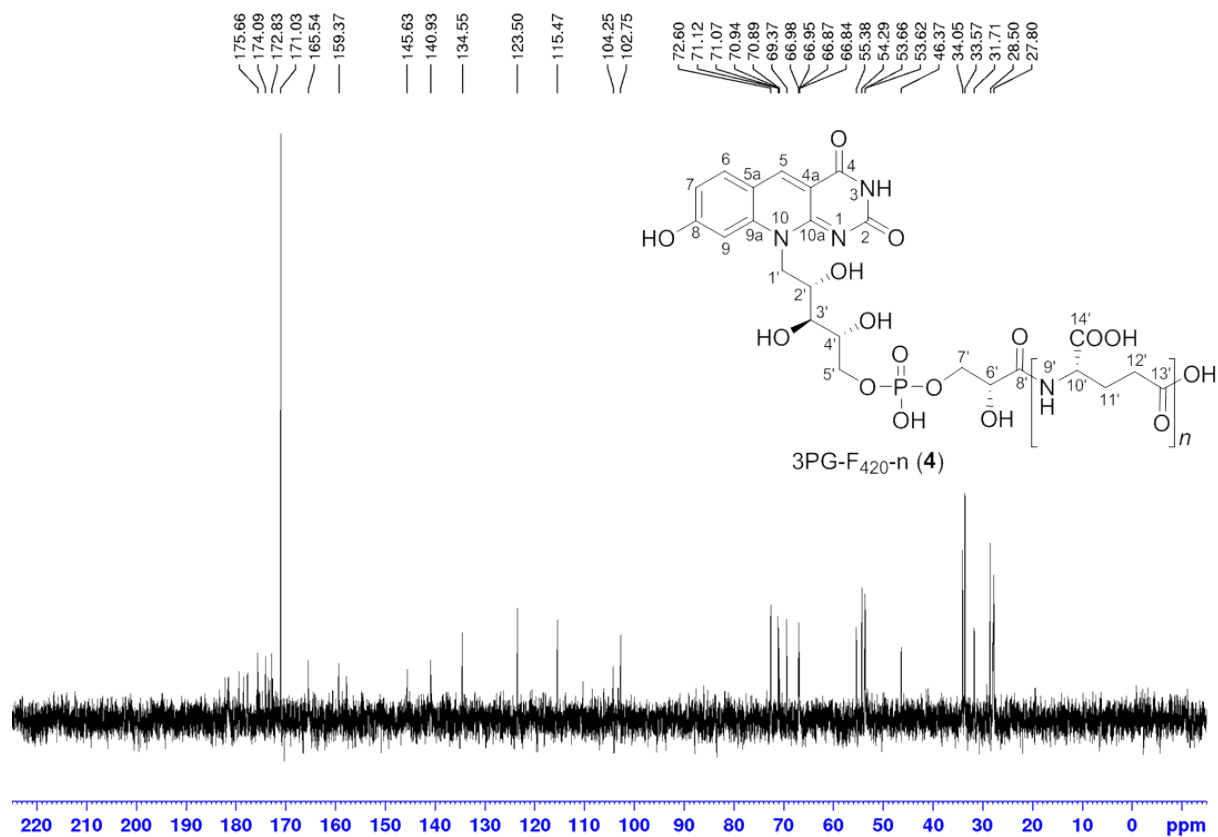

Figure S44. <sup>13</sup>C NMR spectrum of 3PG-F<sub>420-n</sub> (4, 0.1% ND<sub>3</sub> in D<sub>2</sub>O, 300 MHz, 300 K).

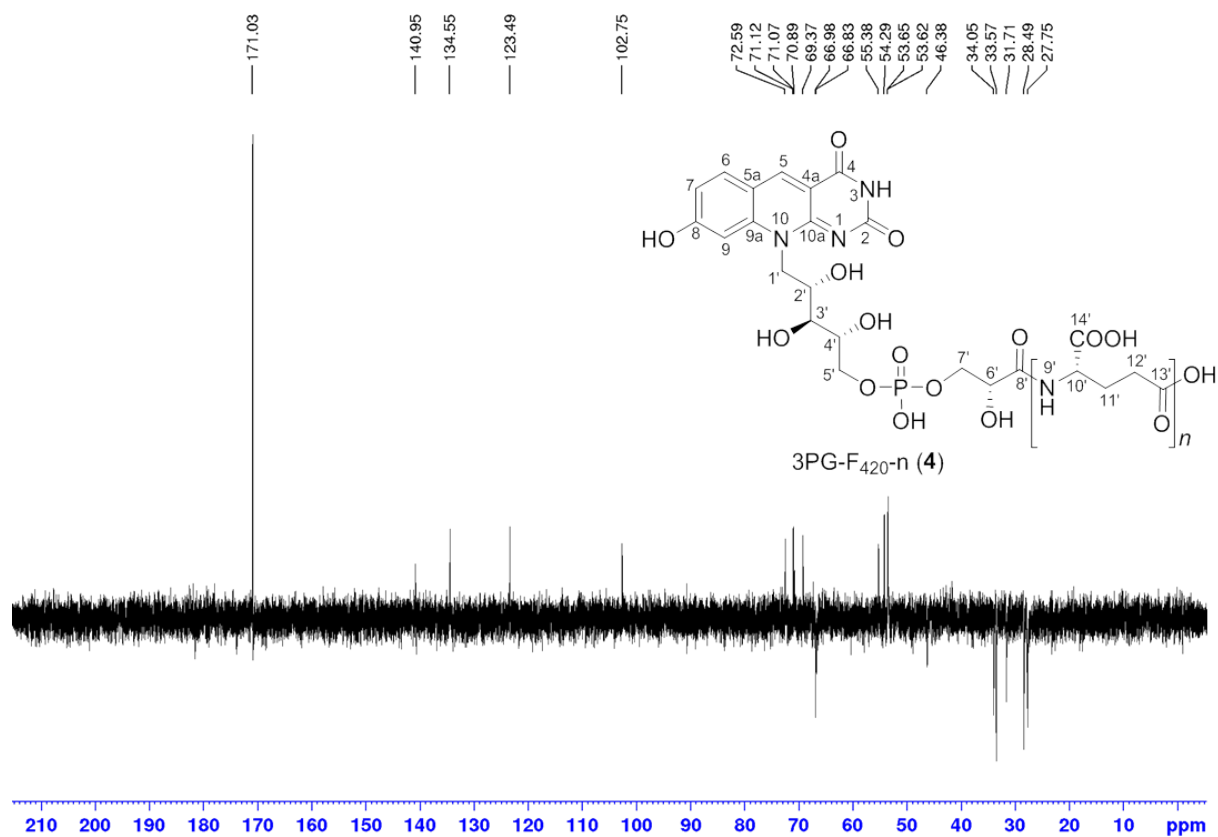

Figure S45. DEPT135 NMR spectrum of 3PG-F<sub>420-n</sub> (**4**, 0.1% ND<sub>3</sub> in D<sub>2</sub>O, 300 MHz, 300 K).

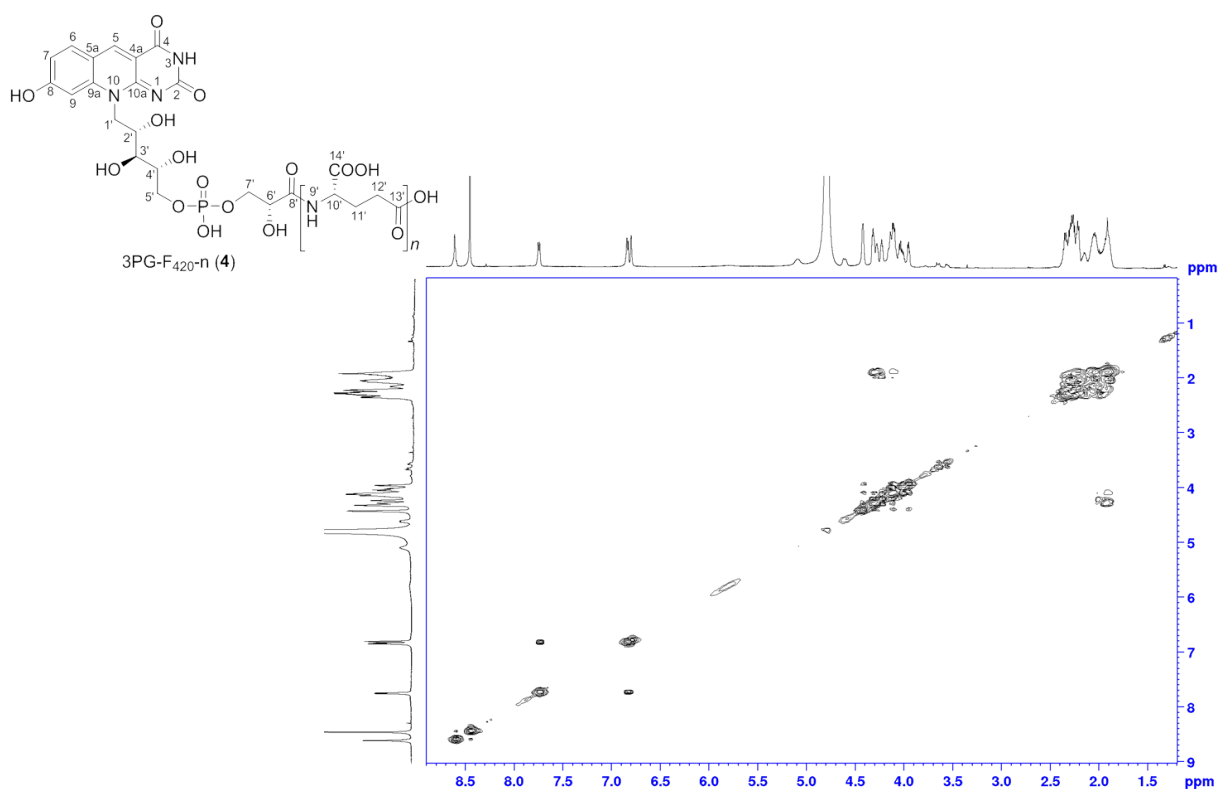

Figure S46. <sup>1</sup>H-<sup>1</sup>H COSY NMR spectrum of 3PG-F<sub>420-n</sub> (**4**, 0.1% ND<sub>3</sub> in D<sub>2</sub>O, 300 MHz, 300 K).

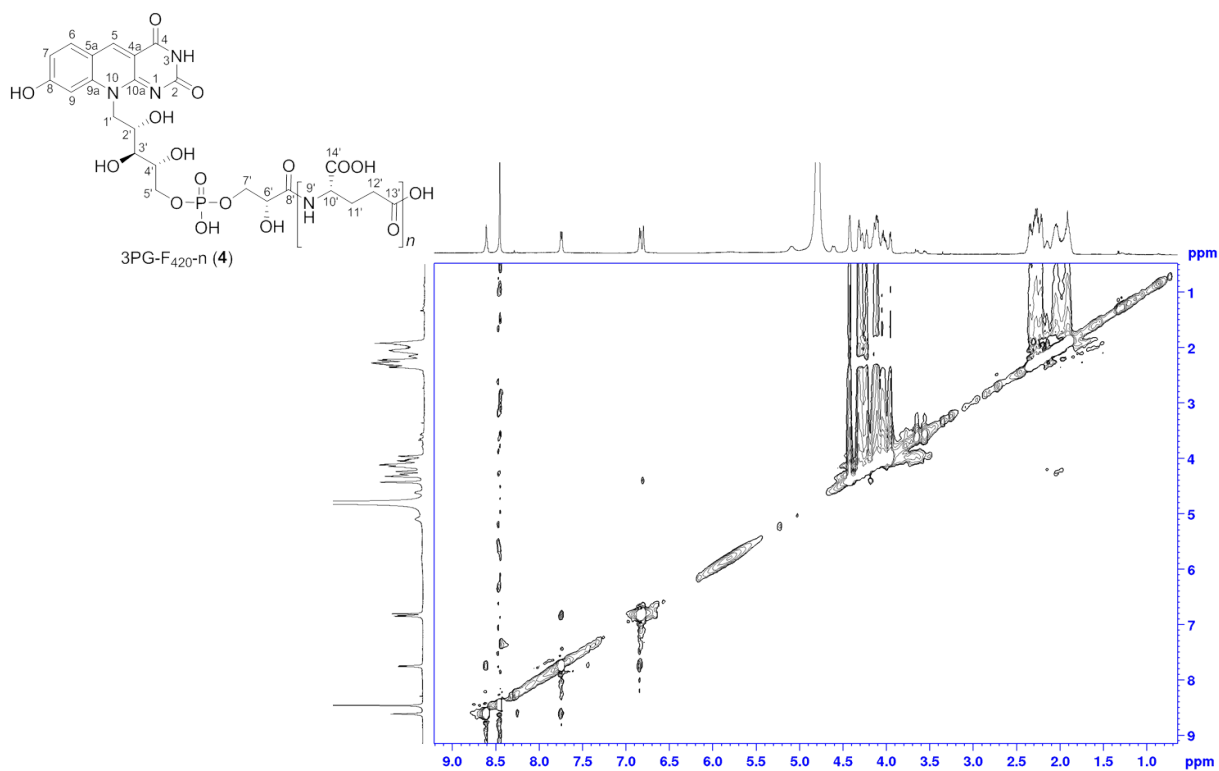

**Figure S47.**  $^1\text{H}$ - $^1\text{H}$  NOESY NMR spectrum of 3PG-F<sub>420</sub>-n (**4**, 0.1% ND<sub>3</sub> in D<sub>2</sub>O, 300 MHz, 300 K).

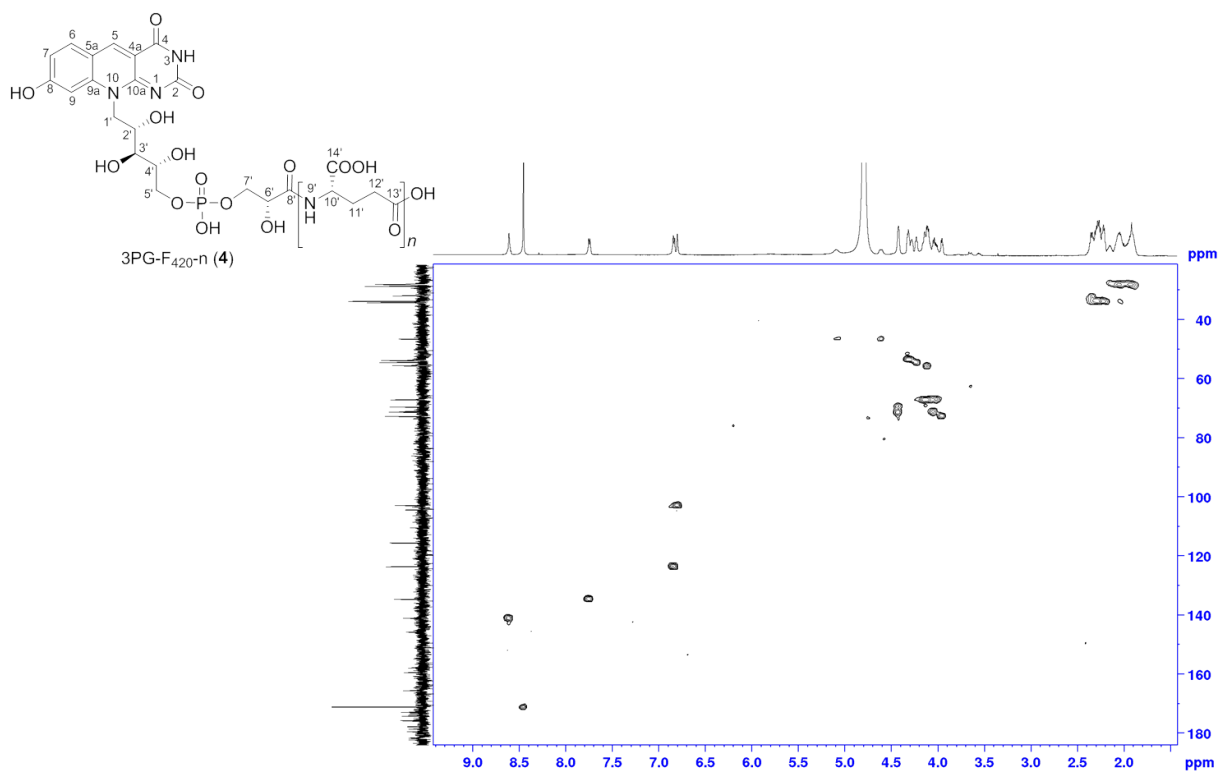

**Figure S48.**  $^1\text{H}$ - $^{13}\text{C}$  HSQC NMR spectrum of 3PG-F<sub>420</sub>-n (**4**, 0.1% ND<sub>3</sub> in D<sub>2</sub>O, 300 MHz, 300 K).

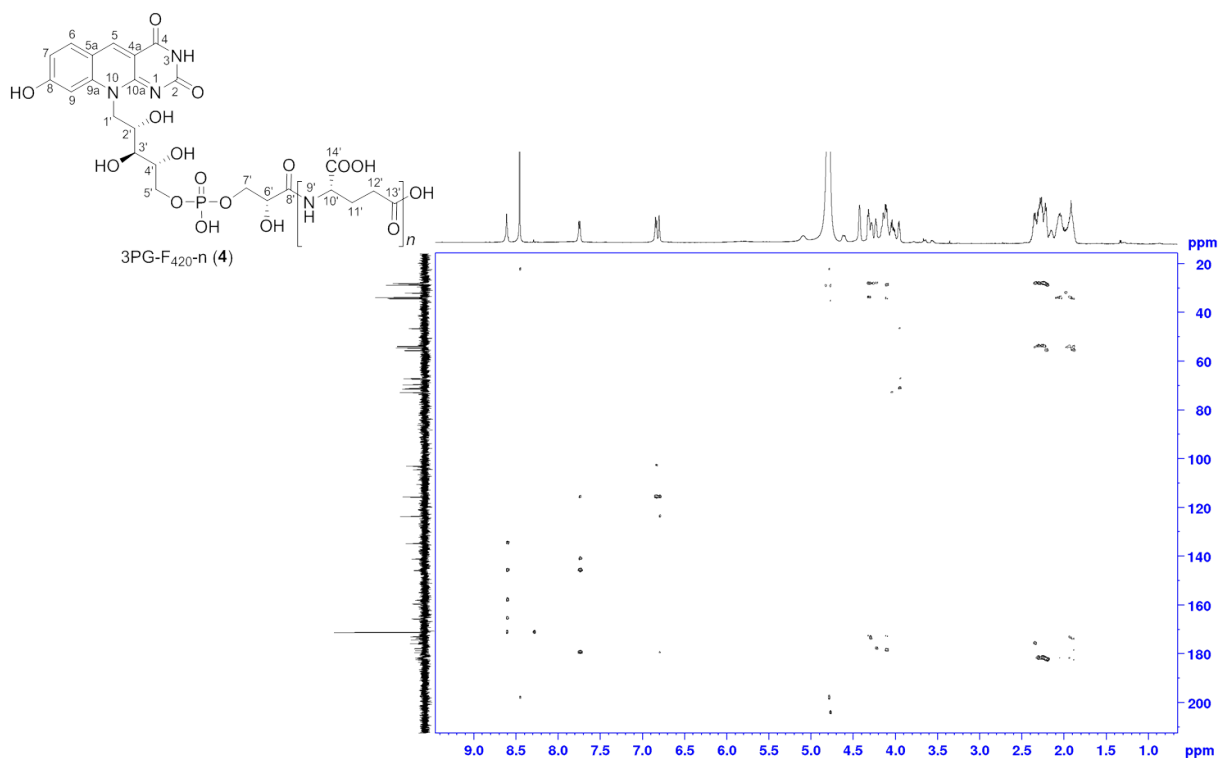

**Figure S49.** <sup>1</sup>H-<sup>13</sup>C HMBC NMR spectrum of 3PG-F<sub>420-n</sub> (4, 0.1% ND<sub>3</sub> in D<sub>2</sub>O, 300 MHz, 300 K).

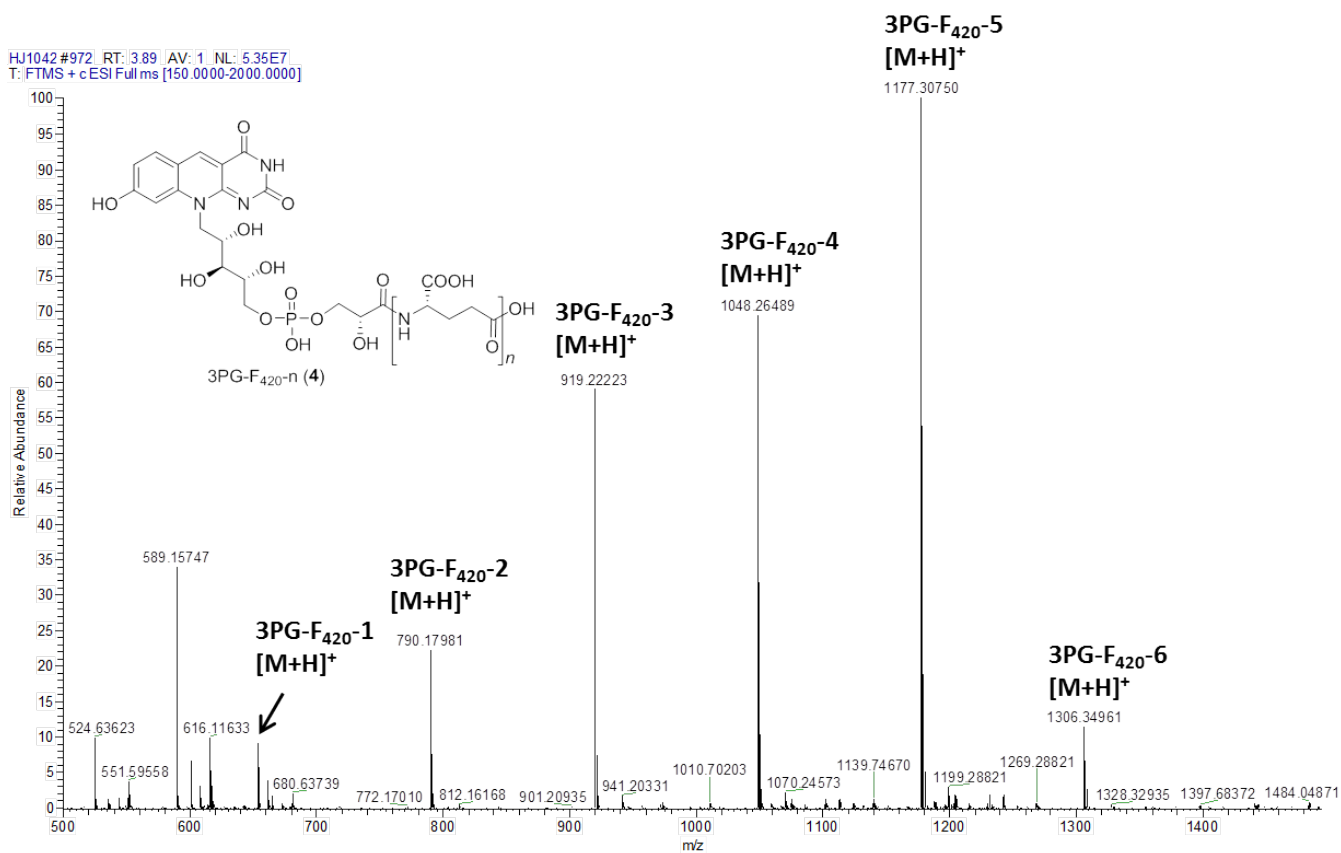

**Figure S50.** ESI-HRMS spectrum of 3PG-F<sub>420-n</sub> (4).



### 2.3.4 Determination of the absolute stereochemistry of 3PG-F<sub>420</sub>

In order to determine the stereochemistry of the 3-phosphoglycerate moiety, we performed acid hydrolysis of 3PG-F<sub>420</sub>-0 (**5**) and analyzed the reaction products by UHPLC-MS as described in Experimental Procedures. Comparison with synthetic standards demonstrated that the retention time of the hydrolyzed product of 3PG-F<sub>420</sub>-0 (**5**) was identical to the one of D-glyceric acid. Therefore, the stereochemistry of 3-phosphoglycerate moiety in 3PG-F<sub>420</sub>-0 (**5**) side chain is assigned as the D-configuration (**Figure S51a-c**).

As a control, classical F<sub>420</sub>-n was submitted to the same analysis. The hydrolyzed products as well as standards of D-lactic acid and L-lactic acid were analyzed under the same analytical condition. The identical retention time of hydrolysis products of classical F<sub>420</sub>-n with L-lactic acid indicated the stereochemistry of the lactyl moiety as L-configuration as described in the literature(8) (**Figure S51d-f**).

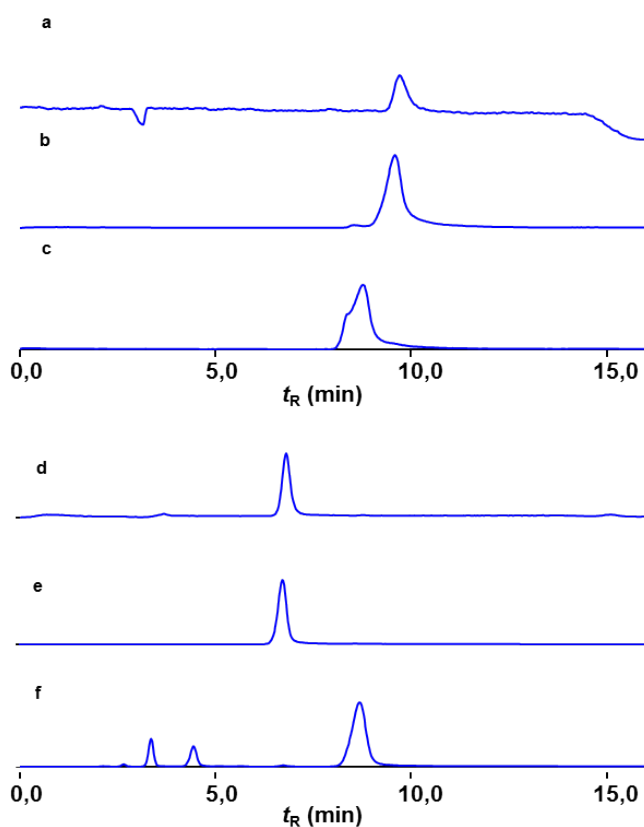

**Figure S51.** UPLC-MS chromatogram of acid-hydrolyzed product of 3PG-F<sub>420</sub>-0 and F<sub>420</sub>-n under SIM mode (-): a) SIM (-) with *m/z* 105.3 of acid hydrolyzed product of 3PG-F<sub>420</sub>-0, *t<sub>R</sub>* = 9.707 min; b) SIM (-) with *m/z* 105.3 of D-glyceric acid, *t<sub>R</sub>* = 9.607 min; c) SIM (-) with *m/z* 105.3 of L-glyceric acid, *t<sub>R</sub>* = 8.747 min; d) SIM (-) with *m/z* 89.0 of acid-hydrolyzed product of F<sub>420</sub>-n, *t<sub>R</sub>* = 6.775 min; e) SIM (-) with *m/z* 89.0 of L-lactic acid, *t<sub>R</sub>* = 6.733 min; f) SIM (-) with *m/z* 89.0 of D-lactic acid, *t<sub>R</sub>* = 8.681 min. AnAstec CHIROBIOTIC R (10 cm x 4.6 mm, 5 μm, Sigma) chiral column was used for chromatographic separation of enantiomers.

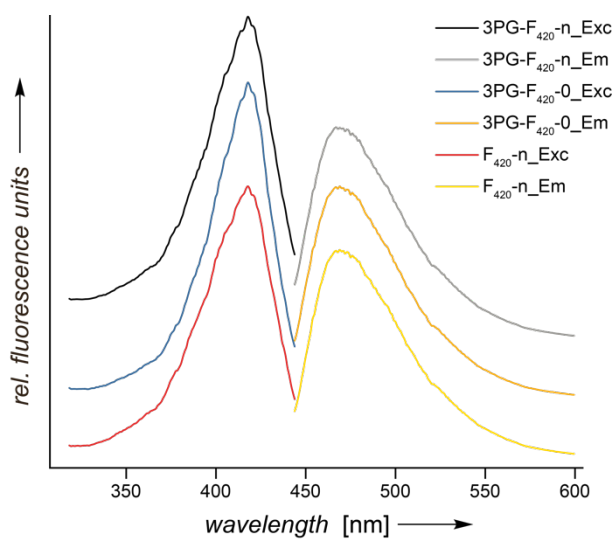

**Figure S52:** Fluorescence emission and excitation spectra of classical F<sub>420</sub>-n, 3PG-F<sub>420</sub>-n and 3PG-F<sub>420</sub>-0 (50 mM sodium phosphate buffer, pH 7.5). The fluorescence spectra were distributed along the y-axis for better visibility. Em: Emission, Exc: Excitation.

## 2.4 Combined CofC/D in-vitro enzyme assay

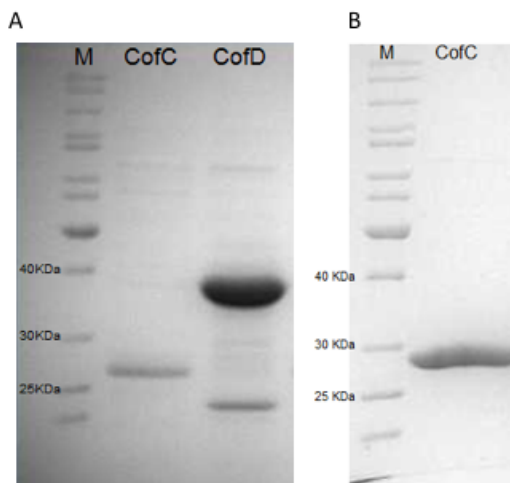

**Figure S53.** SDS-PAGE analysis of recombinant proteins used for CofC/D assays. A) His<sub>6</sub>-CofC from *P. rhizoxinica* (25.8 kDa) and His<sub>6</sub>-CofD from *Methanocaldococcus jannaschii* (37,8 kDa) after metal affinity chromatography (Ni-NTA resin). B) His<sub>6</sub>-CofC from *M. jannaschii* (27.65 kDa) after metal affinity chromatography (Ni-NTA resin). All proteins were produced in *E. coli* BL21(DE3). Page Ruler™ (Thermo Scientific) 10-200 KDa protein ladder (M) was used as a marker.

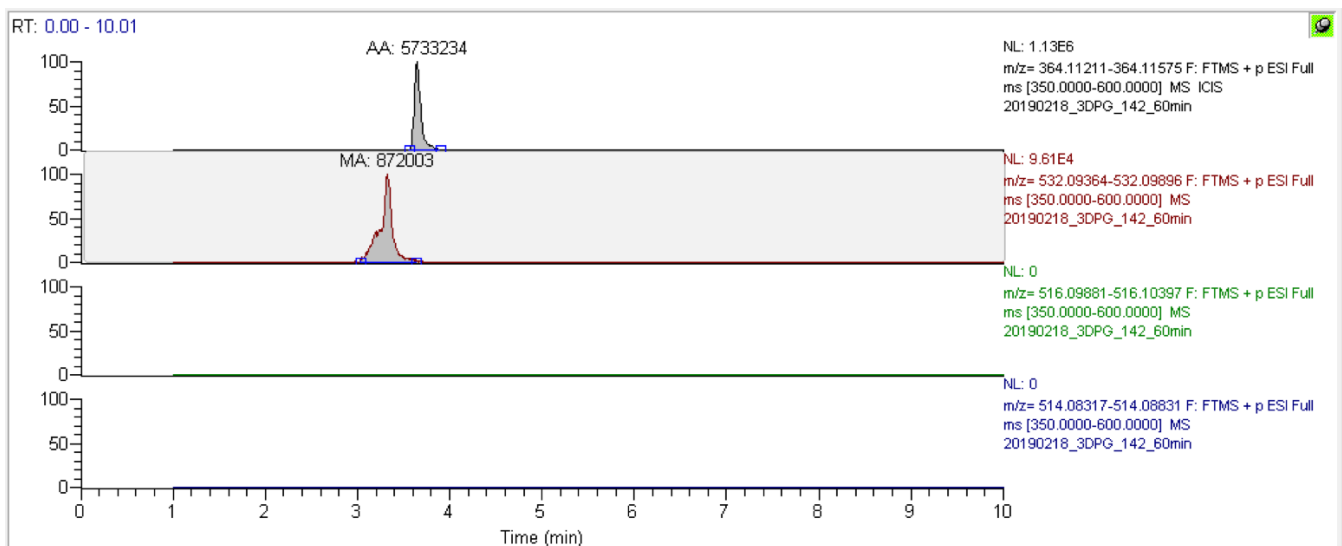

**Figure S54.** LC-MS analysis of combined CofC/D enzyme (CofC from *P. rhizoxinica*) assays with 3-phospho-D-glycerate showing XICs of reaction products after 60 min of incubation. Expected masses ( $[M+H]^+$ , 5 ppm mass tolerance): F<sub>0</sub>: 364.11393, 3PG-F<sub>420</sub>-0: 532.09630, F<sub>420</sub>-0: 516.10139, DF<sub>420</sub>-0: 514.08246. Areas under the curve are indicated on top of each peak. 3PG-F<sub>420</sub> is the only product formed.

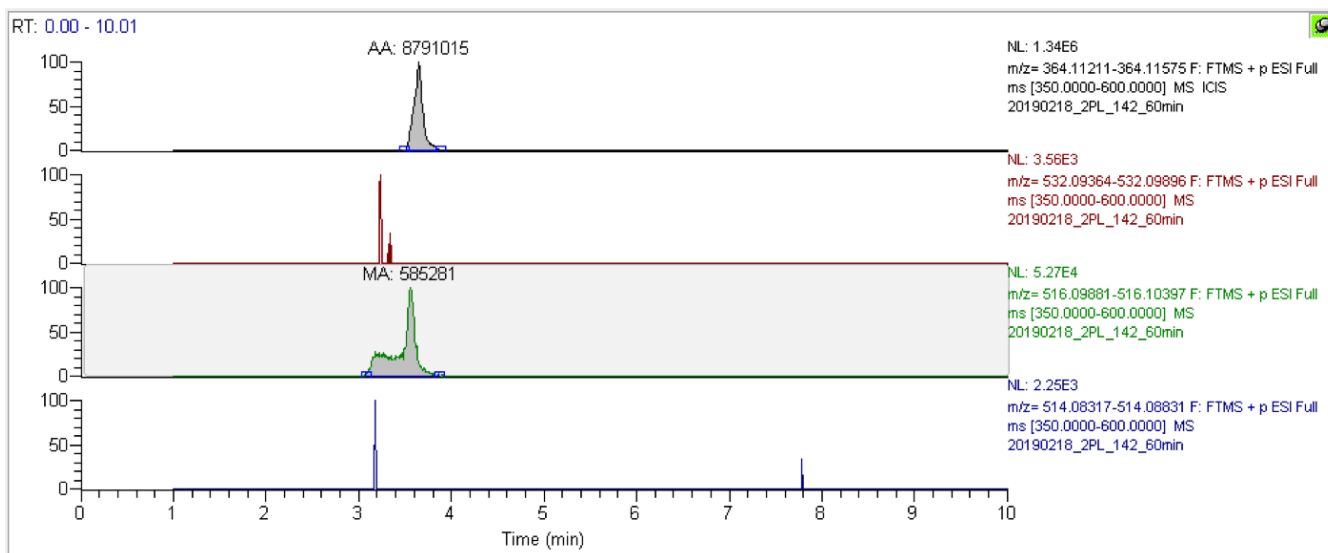

**Figure S55.** LC-MS analysis of combined CofC/D enzyme assays (CofC from *P. rhizoxinica*) with 2-phospho-L-lactate (2-PL) showing XICs of reaction products after 60 min of incubation. Expected masses ( $[M+H]^+$ , 5 ppm mass tolerance):  $F_0$ : 364.11393, 3PG- $F_{420-0}$ : 532.09630,  $F_{420-0}$ :  $F_{420-0}$ : 516.10139,  $DF_{420-0}$ : 514.08246. Areas under the curve are indicated on top of each peak.  $F_{420}$  is the only product formed. Traces corresponding to the mass of other species are below the noise level.

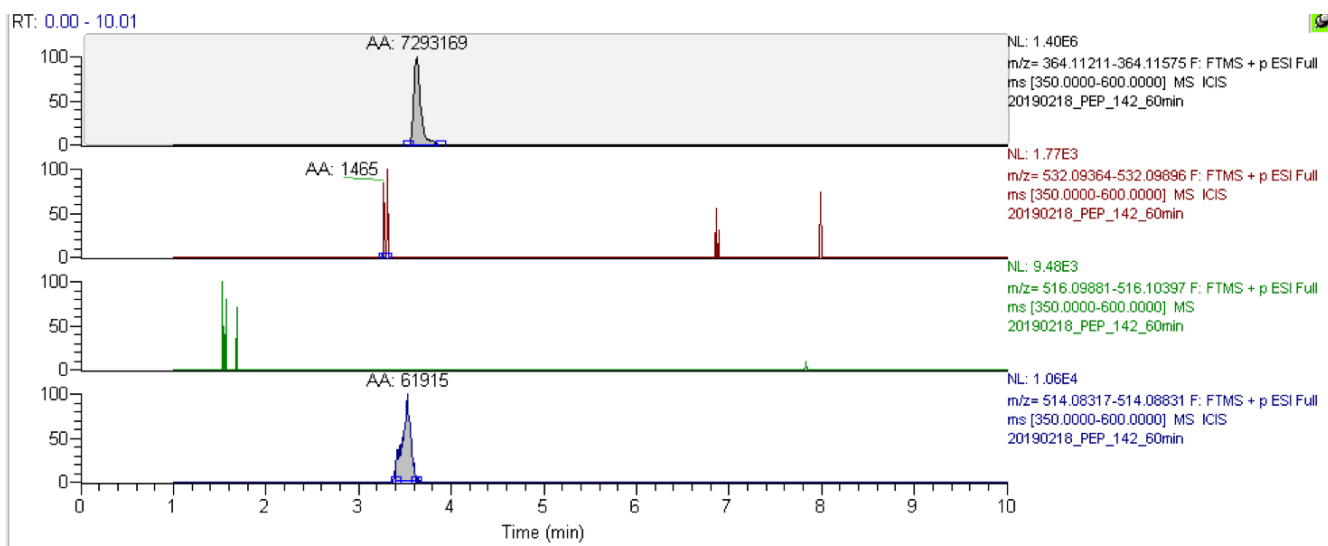

**Figure S56.** LC-MS analysis of combined CofC/D enzyme assays (CofC from *P. rhizoxinica*) with phosphoenolpyruvate (PEP) showing XICs of reaction products after 60 min of incubation. Expected masses ( $[M+H]^+$ , 5 ppm mass tolerance):  $F_0$ : 364.11393, 3PG- $F_{420-0}$ : 532.09630,  $F_{420-0}$ :  $F_{420-0}$ : 516.10139,  $DF_{420-0}$ : 514.08246. Areas under the curve are indicated on top of each peak.  $DF_{420}$  is the only product formed. Traces corresponding to the mass of other species are below the noise level.

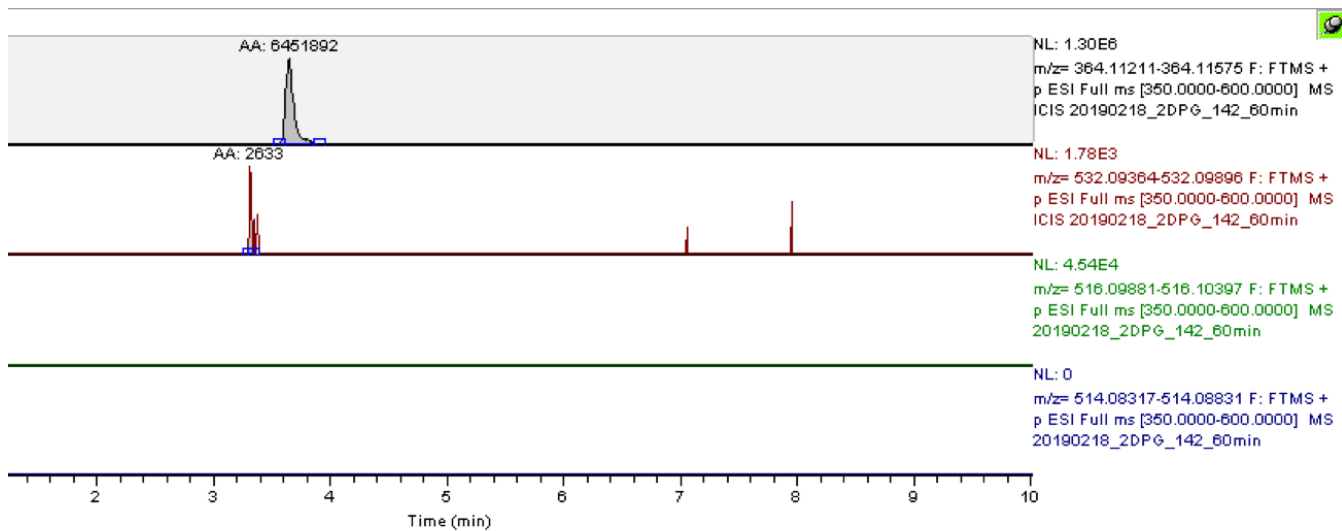

**Figure S57.** LC-MS analysis of combined CofC/D enzyme assays (CofC from *P. rhizoxinica*) with 2-phospho-D-glycerate (2-D-PG) showing XICs of reaction products after 60 min of incubation. Expected masses ( $[M+H]^+$ , 5 ppm mass tolerance):  $F_0$ : 364.11393, 3PG- $F_{420-0}$ : 532.09630,  $F_{420-0}$ : 516.10139, DF $_{420-0}$ : 514.08246. Areas under the curve are indicated on top of each peak. Traces corresponding to the mass of 2PG- $F_{420}$  species are below the noise level.

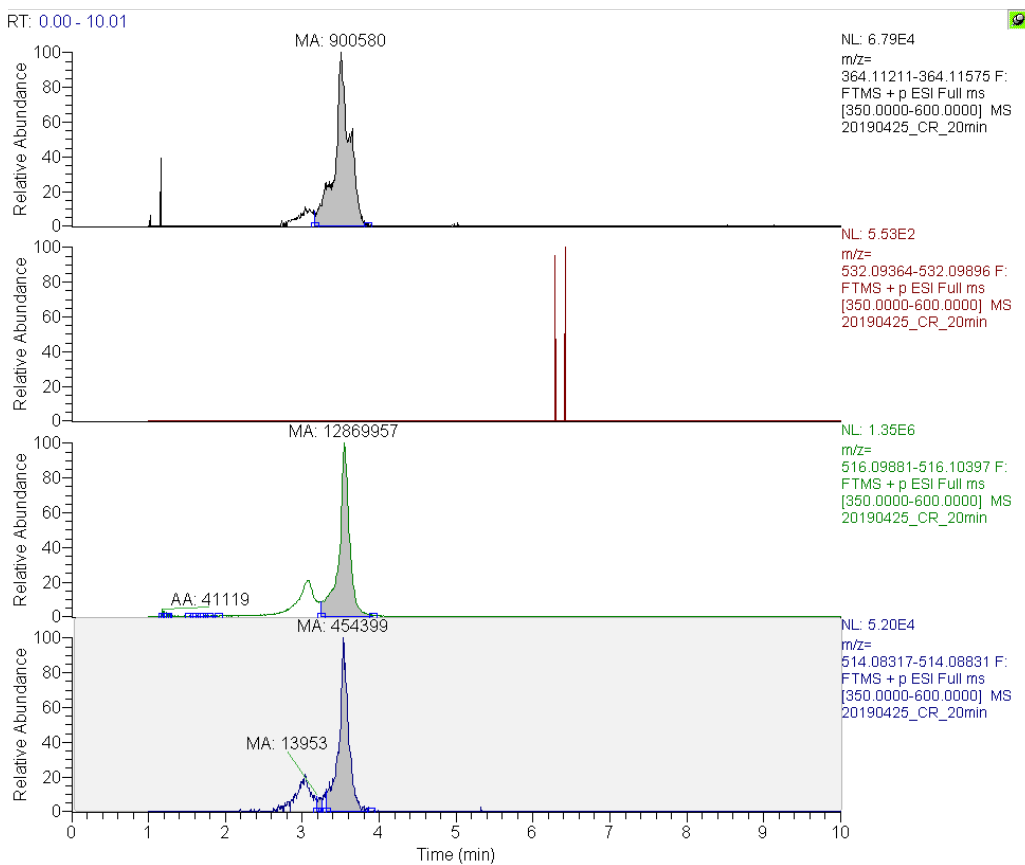

**Figure S58.** LC-MS analysis of combined CofC/D enzyme assays (CofC from *M. jannaschii*) carried out as substrate competition assay (2-PL, 3-PG, PEP) showing XICs of reaction products after 20 min of incubation. Expected masses ( $[M+H]^+$ , 5 ppm mass tolerance):  $F_0$ : 364.11393, 3PG- $F_{420-0}$ : 532.09630,  $F_{420-0}$ : 516.10139, DF $_{420-0}$ : 514.08246. Areas under the curve are indicated on top of each peak. Classical  $F_{420-0}$  and DF $_{420-0}$  are formed. Traces corresponding to the mass of other species are below the noise level.

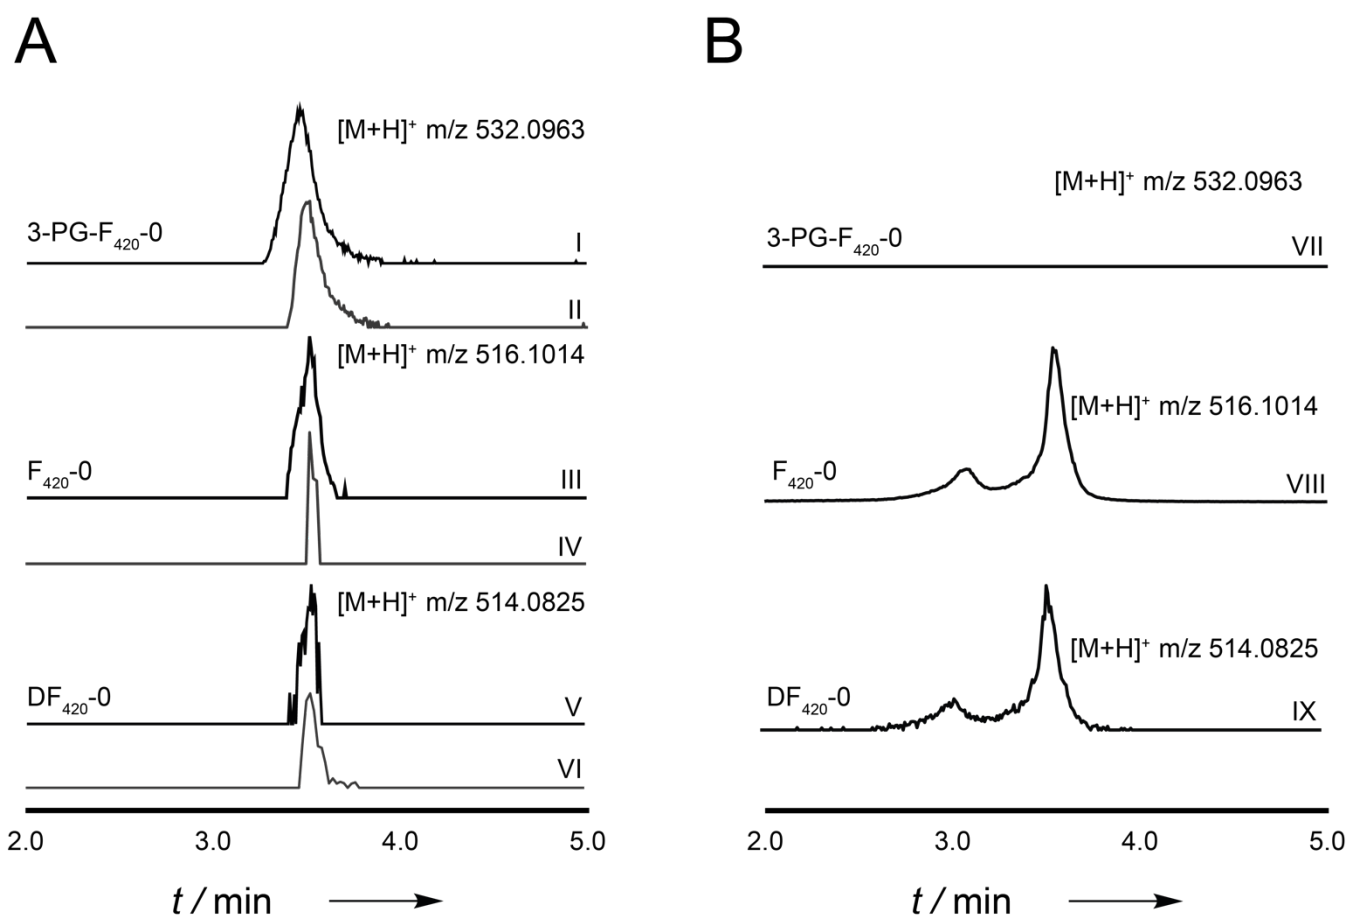

**Figure S59.** Combined CofC/D enzyme assay carried out as substrate competition assay (3-PG, 2-PL, PEP). LC-MS analyses (XICs) shows reaction products in comparison to corresponding in-vivo products: HF420-0 in vitro, III: F420-0 in vitro, and V: DF420-0 in vitro. II, IV, VI show corresponding in-vivo products A) Reaction with CofC of *P. rhizoxinica*. B) Reaction with CofC from *M. jannaschii*. Expected masses ( $[M+H]^+$ , 5 ppm mass tolerance):  $F_O$ : 364.11393, 3PG- $F_{420-0}$ : 532.09630,  $F_{420-0}$ :  $F_{420-0}$ : 516.10139, DF $_{420-0}$ : 514.08246. Intensities are not drawn to scale.

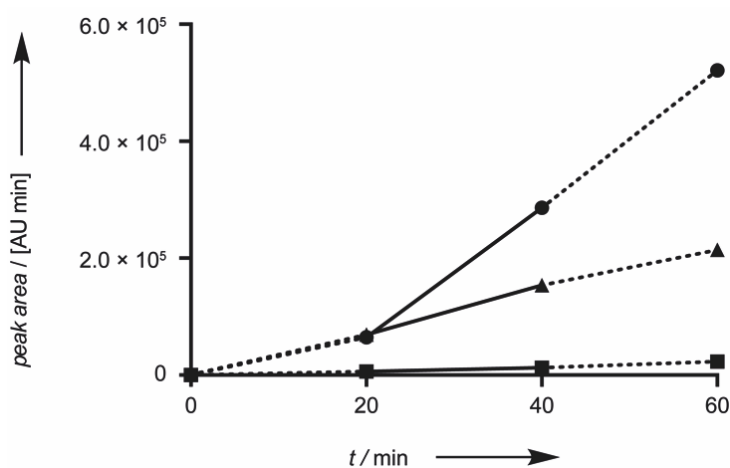

**Figure S60.** Time course of a combined CofC/D enzyme assay (CofC from *P. rhizoxinica*) with competing substrates (3-phospho-D-glycerate, 2-phospho-L-lactate, phosphoenolpyruvate). Corresponding product formation (circles: 3PG- $F_{420}$ , triangles: DF $_{420}$  squares:  $F_{420}$ ) was monitored by LC-MS and shown as area under the curve of extracted ion chromatograms (5 ppm mass deviation). Theoretical masses  $[M+H]^+$ : 3PG- $F_{420}$ :  $m/z$  532.09630,  $F_{420-0}$ :  $m/z$  516.10139, and DF $_{420-0}$ :  $m/z$  514.08574. Solid lines indicate the near-linear range of the reaction that was used to determine the rate of product formation.

## 2.5 Fno and malachite green reduction assays

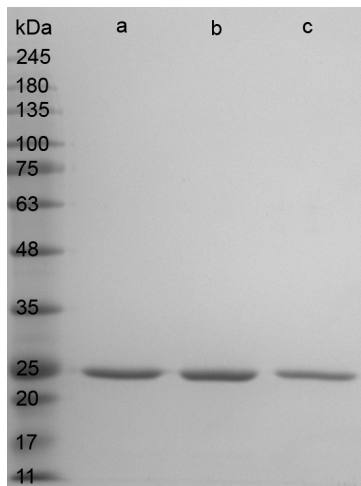

**Figure S61** SDS-PAGE gel of recombinant, purified His<sub>6</sub>-Fno from *A. fulgidus* (24.1 kDa). Lanes a, b, and c show biological replicates used for kinetic studies. BlueEye Prestained Protein Marker (Jena Bioscience) was used as a marker.

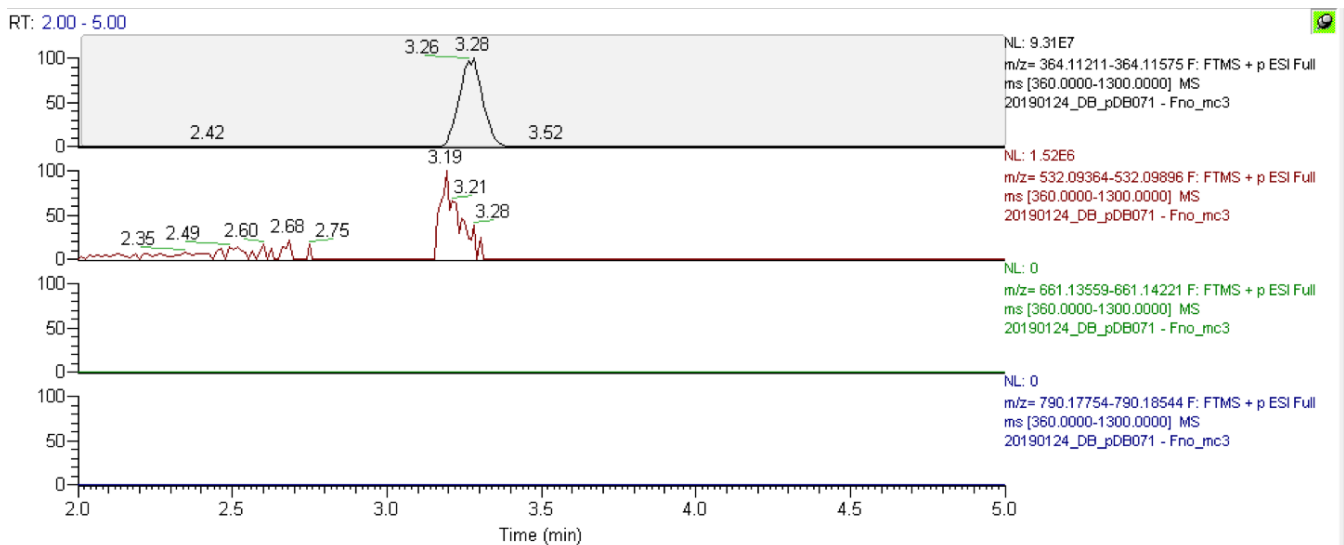

**Figure S62.** LC-MS analysis of extracts of *E. coli* BL21(DE3) / pDB071 (minimal BGC for 3PG-F<sub>420</sub>-0 and *fno*) showing XICs of 3PG-F<sub>420</sub>-n species with a varying number of (oligo)- $\gamma$ -glutamate residues measured on a Kinetex XB-C18 column (Phenomenex). Expected masses ( $[M+H]^+$ , 5 ppm mass tolerance): F<sub>0</sub>: 364.11393, 3PG-F<sub>420</sub>-0: 532.09630, 3PG-F<sub>420</sub>-1: 661.13890, 3PG-F<sub>420</sub>-2: 790.18149. As expected only F<sub>0</sub> and 3PG-F<sub>420</sub>-0 were produced.

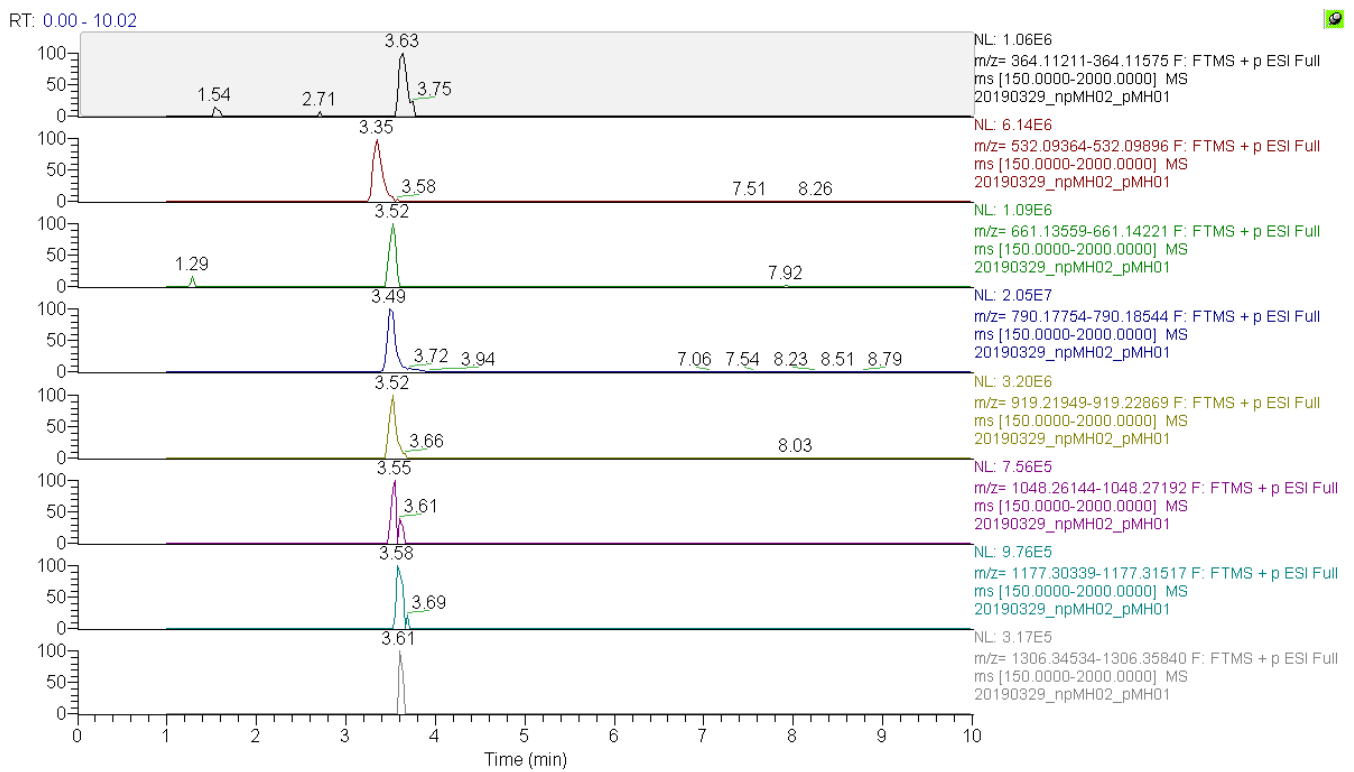

**Figure S63:** LC-MS analysis of extracts from *E. coli* BL21(DE3) coexpressing *cofE* from *M. jannaschii* (pMH01) and a minimal gene cluster (pMH02) producing 3PG-F420-0. Extracted ion chromatograms (5 ppm mass tolerance) were extracted using the following exact masses ( $[M+H]^+$ ): F<sub>0</sub>: 364.11393, 3PG-F<sub>420-0</sub>: 532.09630, 3PG-F<sub>420-1</sub>: 661.13890, 3PG-F<sub>420-2</sub>: 790.18149, 3PG-F<sub>420-3</sub>: 919.22409, 3PG-F<sub>420-4</sub>: 1048.26668, 3PG-F<sub>420-5</sub>: 1177.30928, 3PG-F<sub>420-6</sub>: 1306.35187



RT: 0.00 - 10.01

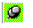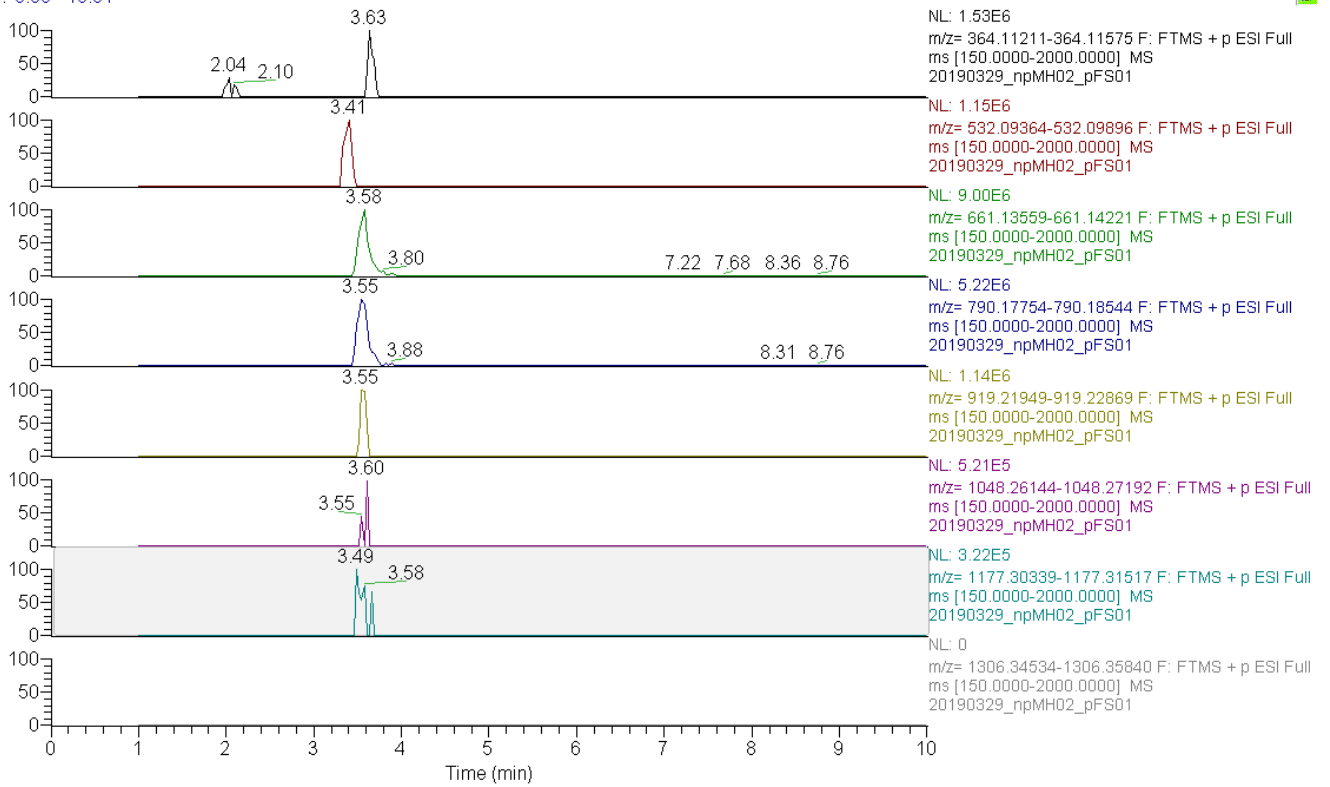

**Figure S64:** LC-MS analysis of extracts from *E. coli* BL21(DE3) coexpressing *cofE* from *P. rhizoxinica* (pFS01) and a minimal gene cluster (pMH02) producing 3PG-F420-0. F<sub>O</sub>: 364.11393, 3PG-F<sub>420</sub>-0: 532.09630, 3PG-F<sub>420</sub>-1: 661.13890, 3PG-F<sub>420</sub>-2: 790.18149, 3PG-F<sub>420</sub>-3: 919.22409, 3PG-F<sub>420</sub>-4: 1048.26668, 3PG-F<sub>420</sub>-5: 1177.30928, 3PG-F<sub>420</sub>-6: 1306.35187

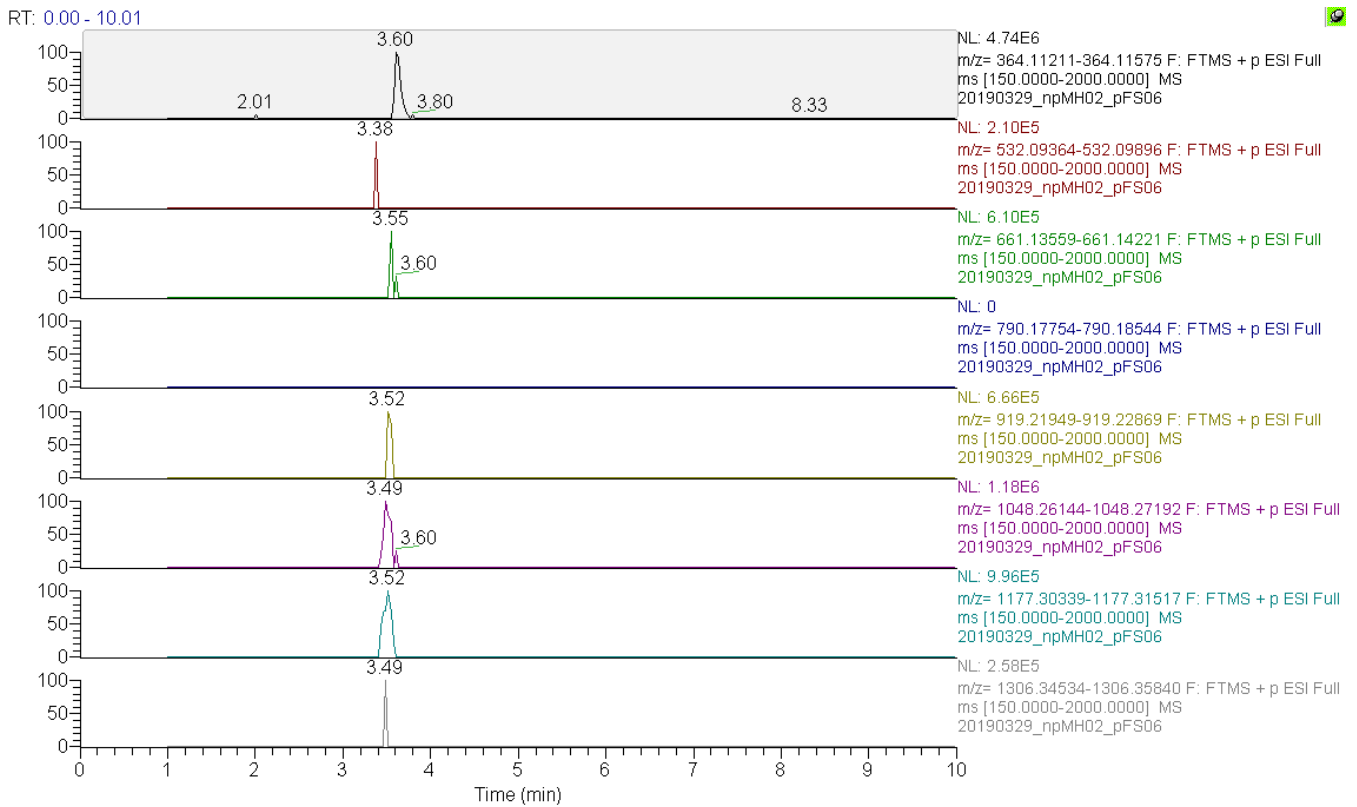

**Figure S65:** LC-MS analysis of extracts from *E. coli* BL21(DE3) coexpressing *fbiB* from *M. smegmatis* and a minimal gene cluster (pMH02) producing 3PG-F<sub>420</sub>-0. F<sub>0</sub>: 364.11393, 3PG-F<sub>420</sub>-0: 532.09630, 3PG-F<sub>420</sub>-1: 661.13890, 3PG-F<sub>420</sub>-2: 790.18149, 3PG-F<sub>420</sub>-3: 919.22409, 3PG-F<sub>420</sub>-4: 1048.26668, 3PG-F<sub>420</sub>-5: 1177.30928, 3PG-F<sub>420</sub>-6: 1306.35187

## 2.6 Plasmids sequences (Fasta format)

>pDB045

```
GGGGAATTGTGAGCGGATAACAATTCCCCTCTAGACCCGGGGGTGATCCGATGCAACTACAATGCCATGCTGGAAGCAGC
GAGTACGTGACACATGTGCGCAAAGCAGCGATGCCAACTCGTTACGGAAATTTTGTGCCCATGCATTTTCGTTGACAAG
CGATAACAATGAGTATCTCGCGCTGGTGTATGGGTGACGTTTGCCAACGTGAATCAGTACTGACGCGACTGCACTCCGAGT
GCCTCACCGGTGATGTAAGGATCACTGCGCTGCGATTGTGGTGAACAATTGGACGCCGATTACGCCATATCGCATCT
GAAGGCGTTGGCGCGCTATTGTATTTGCGAGGCCATGAAGGACGCGGCATTGGCTTGTGTAACAAAATTTTGCATACGG
ACTCCAAGAACAAGGACTTGACACCGTCGATGCCAATCGCGACCTGGGTTTGCCGGATGACGCGCGGAGTATGACTGCG
CGGCAGCATCGTGCGCCAACTCGCATCTCTGCGGTACGGCTGATGAGCAACAATCCGGATAAGTTTGAAGCGCTGCAG
CGCCATGGCATTCCAGTATGTGAGCGCGTTGACCTCGCAATTGCATTACCGGAGGAAAATGAGCGTTATATCTGGACTAA
GCGCAATCGTTTCGGGCATTATTTTGACGAGAGTGAGCTTCAGTGCCCGTTGTCATTGTAGAGGCCTATATGAGATGCAA
TGGTATGTCCTCTGTTTCTGTCGCCACGCAATACGGGCATCTGGGCGGTCTGTCGGTTGAAAGCGCCTGAGTGTGCCA
AAACCCGGTTGTCTGGCGTTTTAAGCCATGCTGCGCGCCAAGCGTTGTTTTTTCCATGGCCAGTCATGTCATTGGTACG
TTACGCGCATCGCCTCGGATTGCTTCCCTATTGGTGGTACGCGCTCGAAAGTACGGCGGAAATGGCCCGGGCAGCCGG
TGCTGAGATCTTGTGGGGACCACCGGACGAAGGCATGGCGAATGCCTGTTTCGCGAGCGATGGCTCATATTGCGGCAGCAG
GCGGAGAGCGTGTGATGTTTGTCCCGGTGATTTGCCCTGTTGGATGGGGCGGCCATCGACATGTTGAGCCGTGCACCG
GTCGATGCGATTGGCATGGCGCCAAACCGGGACGGTCATGGCACGAATGGGCTGATTTGCCGACCTGGCGCTATTCGTT
GTTTTTCAGCGGGCCAAGCTTTTCCGCTCATAAAACGCCGCTCGGTGCGCCGGAATTGATGTTGGATTGTCCGTTCAA
GAGAGTGGGCGTTGGATGTAGACTTGCTGCGGACCTTGAGGAATTCGAGTCTCCATCAAAGACGCCAAGAGGAGGGTG
CTATGCCAAATCTAGTAAGCAATCTATTTACAAAATGATCCAAGAGGTCGAACGTTCCGCTAAGGGCAGTCAGCCAAGG
CTAGATGACAAGGCTTTGGCGTATGAGCTTGAAGCGGTGCAAGATTGGCGTGAGTTGGCGGGTCTGGCATCGGCATGGCG
CGATATCGGTTGGGGCAACGTCATCACCTATTCGCGCAAGGTTTTATTCCGCTCACCCATCTTTGTGCGAGATGTTTGCC
ACTACTGCACCTTTGCCAAAGCGCCACGGGTGATTGGCCAAGCATTTCCTACCGTGGACCAAGCGCTGGACATTGCGCGG
GCGGGTGTGTCAGTTGGCTGTGTCGAGGCTTTGTTTACGCTCGGAGATCGGCCCGAAGCGCGTTATGCCGCTGCACGCGA
TGCCTGACGCAACTTAAATATGGGCTCATGCTACGACGCCGACTATGTCGCTGAGGTGCTGCGCAACGCGTACGAGTCAAACCGGGC
TGCTGCCCCACTTAAATATGGGCTCATGCTAAGCGCGGACAGAATACCAGATGCTGCGGCCCCATGCCCTTCCCTCGGGTTG
ATGCTAGAGACGGCTTCTGAACGCTTTCCGAGCGTGGTGGGCCGATTACGGCTCTCCCATAAGCACCCGGCAGCGCG
GCTTGAACGCTTCGCTTGGCGGCAAGCGCATATACCGATCACCTCAGGCATATTGATTGGTATCGGGGAGACACGCC
GCGAGCGGCTTGAATCGCTCTTTGCGCTGCGGGATTTGCATGATCGCTATGGTCATGTGCAGGAGGTCATTATTACAGAAC
TTTCGCGGAAACCCGGCACCAAAAATGGTTAACGCGCCTGAGCCGTCATGGACGAATTGTGTTGGACAACAGCGGTGCG
CCGGTTGGTCTCGGTTCCGCAATGAGCATCCAGGTGCCGCTAATCTTTTCGACGGTGACTTGACCGATTGATTGCGG
CGGGAATCAATGATTGGGGCGGCGTATCGCCGTCACGCTGATCACGTTAATCCAGAAGCGCCGTGGCCGCACCTTGAC
CGCTTAAGTGAGGATACAGACAGGGGCGGGAAGACGTTGACCGAGCGGATAACCGTCTATCCTGCCTATATCGAGGAACG
TGATCGTTGGATCGACCCGGGCTTGCATGCTGATGTGCTACGCCATTACAGATTGCAGTGGATTGGCAACAAGCGATATCT
GGAAAGCCGGCTCCACGACGATAGGGGATATCGCTTGCCTGGCAGTCACTCCCACGGCTCCAGGTTGATCGTGTGGT
TCGCAGACGATCGATATCGTCGAGAAAATGCGTGGCGGGTGAGCGCCTCGAAGAAGCCGAGCTTGTACATTTATTAACGC
ACGCGGCCATGATTTACGCATGTGACGCACACGGCGGACCGTTTGGCGAGGACAGACAAAGGGCGACACGATCACTTACG
TTGTCAATCGGAACATCAACTACACCAACGCTGTCGAATACCAATTGCAATTTTGTGCTTTTTACAGGAGCCGATACAA
GAAGACTTGCAGAAAAGCCCTATATCGTTGACCTCAACGAAATCCGTCGCCCGTCAAAGAAGCGTGGGATCGAGGGGC
GACGGAGGTCTGCTTGAAGGGGGCATTATCCCGACTATACGGGACGTACTTATCTTGACATCTGCGAAGCGGCTAAAA
CAGAATCTCAGCATGCACATTCACGCTTTTCGCCCTTGAGGTGCTGATGGTGCACGACCCGAGCCAGCCGAGTCAATC
AGCGTTTTTTGCTGCTGTTGAAAAGCGCTGGATTAAGTACGTTGCTGCGGACCGACCCGAGATCTGGACGCAAGT
GCGGCGACAAATCTGTCCGGATAAGTTGAATACGCAAGAATGGTTGACCGTCGTGCGATCGGCACATGAGTTGGGATTGC
GGACCACTGACGATCATGTTCCGTCATGTCGAATCGTATAAGCATTGGGCGGACATATCCTCAGGCTTGCCGAGCTG
CAACGTGATACAGGCGGGCTGACTGAGTTTGTCCATTGCCTTTTGTCCATGAGGAAGCGCCATTATTTAAAAAGAAAGG
TGCGCGTACAGGGCCGACTTTACGAGAAGCCATTTGATGCATGCCGTCGGGCGTCTGGCGTTTCATGGCTTGATTGACA
ATATTCAAACGCTTGGGTGAAAATGGGTGAGCACGGCGCACAGCTTTGCTTGCAGGCGGGGCTAACGATTGGGCGGT
ACCCTAATGAATGAATCGATTAGCCGCGCAGCCGTCAGCCCCACGGACAGGAAATGCCGCTGCCGCCATGGAAGCCCT
GGCCGCCAGACTCGGGCGCAATGCGATGCAGCGTACCCGCTTTATCGTAACGTCAGTCTGAGCGGCAGCAAGCTTCGC
ATGCTGCTCCTGCGCTGGTGCCTGTGCGATTACTAAGGCCGGACGCTTGGTGCCTGGGACGGCCATCAGGTTGAGT
GAAGCGGAACAATGATTGGACCTGCATAGGTGGATCATAGGTGGATTGATGGTGTGGCTTGCATGTTGGCAGCCTCAAAT
CGATGTTGTGATGGCTCTCACGCAGCGCTTCCCATCATGGATTACCAAGGTGCTTAATTACCCTATTAATAAGACAGA
CGTATTCGGTTTTGACACGATCGGAAGGGTGATCGGTTTGGGTCAGAGAAATGCTTGTATCTTTACGAGGAAGATAATGG
CAAAGTATGTTGCGTTGTGCGGCGGGGTGGGCGGCGTAAGCTGGCCTATGGTCTAGCGCAGGTGCTTTCTGCCGACGAG
TTGACGATCGTTGTGAACACGGGCGACGATTTTGGATCTTGGCTGCTCATCTGTCCAGACCTGGACACGGTTGTCTA
TACGTTGGCCGATGTGCGCAGATGCAAAAAAAGGATGGGGCGGGCAACGAGAGCTGGTCTTCGAAAGACGCTCGCTC
GTTTGGGCGGACCGTTTGGTTCCAGCTGGGTGACAAGGACTTGGCTGCTCATCTTTATCGGCGCAGACTTGTGACGGT
GGTGCCAGCTTGTGTGATGTAACCGAGACCAATTGCGAAAGCGTTAGGTGTCAAGCATTCAATCGTCCCAATGTCTGATGA
TCCGCTCAGAACCATCGTTGAGACAGACGAAGGCGATTTGCCTTTCCAGACGATTTTCGTTAAACGGCGATGTGAGCCAC
GCGTGTGCGGGTTCCGCTTTGAAGGGGCTTCGCTAGCACGTTTATCGTCGCCATTTGAAGCAGCGTTGAGTACGCCTGAC
```

CTGGCTGGCGTAATCTTATGCCCTTCGAATCCTTTTGTGAGCATTGGACCGATTCTGGCATTACCGGGCGTGCGTGACAG  
GCTGCATGCGTGTAATGTGCTGTTTTAGCTGTTGCGCCGCTTGTGCGTGGTGAAGCAGTCAAAGGCCCGTTGACTAAGA  
TGATGCATGAACTGGGCATGAGTGTTCGTTGGCGAGATTGCTTCGCTTTATGCTGATTTCCCTTGATCTGCTGGTGATT  
GATCCGTTGGATGAATGCGATCATGATCTTTTGGCTAAGGATCGTGTGGCAGTCAATAAAGTCAAGACGCTCATGACAAC  
ACCTGATGAGCGTATCGCGCTTGGCGGACACGTGCTGGCTTGGCTTGAACATCACCGAAACAATCGACAGACAGCTCAGC  
TTGTGCAGCAGCAGCCGATAAATACATTGACTATAATTTTTATTAATTAGTTGATGGCTATACAGAAAATAAAAA  
TGATCAATGGCATGCGGTACGGCAAACGCTTGGCTGAACCACTCAGAAAGTGCATCCACTACGCATGCGCCGCTT  
TGGGCTTTGTTTCTCCCTTGTCATCTTCAATTGGCGCGGCGACTGGCAGACAATCGCTGCGCTATTTCCCTATTTGAT  
GGTTTATAAAGGGCGCGTGCCTTCGCACTTGCCTGTCTGTTGCCGCAAAAACCTCGCTAATCTAGGGGTTCCGGTGGTGA  
TGAAAGCGATTGTCGACCAATTATCAGAAAATTGACCGTTGGCAACGCAGGAATCGTCATTTTCCCTGTTCCACGGCGTG  
AGTTTTCTTATTGTCGTTATGCGGTGTCGTTTATCAAGCTCGCTTTTTGCTGAGCTGCGTGAAATTATCTTTGGAAA  
AGTGGCTTACAACGCTGCGGACAAGTGGCACTCGAGTATTCCGGCATCTGCACACGTTGTCGTTGTGTTTTACCTTG  
AGCGGCAACAGGTGGCCTATCGCGGATATTGAGCGAGGCACGCTGGCGTCAAGACGCTTGTTCATATTCGCTCTAT  
AATATCCTGCCAATATGTGTTGAAGTCATATTGGTACTCATTTTTTTGCTATTTCGTTACGACATCTATTATACGGTCTG  
CACGCTATCCGTGCTTGGCGCTTACATCACGTTTACCGTGATGGTGACAGAATGGCGTACGCGTTAAGGCAGGAGATGA  
ATAAGCTTGATTACGCTCCAATACGCTAATGGTTGATTTCGCTTATTAATTACGAGACAGTCAAGAACTTTGGTAACGAG  
CAACACGAAGTACAGCGCTATGATGAAAGCATGATGCTTTATCATGATGCGGCAGTTCGATCGCAGAAAACGCTTTCGTT  
CATGAATCTTGGCCAGCAGTCGATTATTGCAATCTGCATGATTGCCGTTTTATGGAGGGCGACGCAGCAGGTTGTGGATA  
AGCAATTGACATTTGGGCGACTTTGTGTTAATCAATACATTTATGTTGCAGATATATATCCGCTGAGTTTTTTGGGGAAT  
ATGTATCGAATTTGAAGCAAAGTCTGACCGATATGGATCAGATGTTTTCTTTGTTAAGGCTCAGACGTGAAGTTGACGA  
TATTAAGTTTCACTCCGCTTGTGTAAGAAGCGTGAAGTACGCTTTGAGCATGTCAGTTTTTCATATGAACCGCAAC  
GGCAAATTTGCGGGATGTCACCTTACGATTGCAGCGGTACGACACCGCAATTGTCGGACATAGCGGTAAG  
TCGACACTTCGACGGCTTGTCTCGCTTTATGATGTAGAGCATGGCGCTGGTCTGATTTTGATTGATGGCCAAGACAT  
TCGGGCTGTGACGCAAGACTCGCTACGCGCGGCCGTTGGCATTGTGCCGCAAGATACGGTGTCTTTCCGTTGACACGATCT  
ATTACAATATTGCGTACGGACGGTGTCTGCGTCGCCAGAAGAAGTATAGCGGCTGCGCGCGCCGCTCATATTCATGCT  
TTTATTGAAAAGCTTGCCCGCTGGCTATCCACTATAGTGGGTGAGCGTGGTTTTGAAATTATCTGGCGGTGAAAAACAGCG  
CATCGCAATTGCCGTACCTTGCTAAAAAAGCCGCTATTCTCATTTTTGATGAAGCGACTTCAGCACTCGATTCACGTG  
CCGAGCGTGCATTACGCGGAGTTGAAACAGCTTGGCGTCATCGTACAACACTAATCATTGCGCATCGTCTGTCGACC  
ATTACGCATGCGCAACAGATTCTTGTATGGATCAAGTCTGATCGTTGAGTGTGGCACCCACAGAACATTGCTGAATGC  
AGGTGGCCTATATGCGCAAATGTGGCATTGCAACACAAGCAGCCTGAATAAGTTAAACCAGCAAGAAGCATGACTGTA  
TCCGCCATCGGTGGCATTCCCTTAATACAAACAGGGGATGATCTTGGCCAGATTATTAAGGAGGCGATCCACAAAAACGG  
TATCGCTCTAGAAAATGGCGACGTGTTAGTGCTTGGCAAAAGATCGTTTCAAAGTCCGAAGGACGATGGGCTGCACTAT  
CTTCTGTACGCCCCGCAAAACAAGCTATCGATTTGGCGCAGAAAAGTGGATAAAGATCCACGGCTCGTTGAACTGATCCTA  
TCGGAGTCGGCAGAAAATCGTTGCACACAGGCAAGACGGTGTACTGATCACCGCTCACCGTCTCGGATGCGTGATGGCGAA  
TGCCGGTATCGATCATTCCAATGTTGGTGAAGACAGTGTGCTTCTGCTTCCGAAAGACCCGGATCACAGTGCACGCG  
AATTAACAAAAACAGTTTCATCGCTTGTGCGGCGTCGATGTCCACATCATCAACGATAGTTTTGGCAGAGTGTGGCGC  
CATGGCAGGACAGGATGCGCAATCGGTGTAGCGGGCTTTCCCGCTTAAAAAATTATATTGGGAAGCCGGATGTTTGG  
GCAGCTTACGAACAACCAAGTGGCAGTGGCCGATGAACTCGCCGAGCAGCGTCTTTCTTAATGGGCAAGCCGATG  
AAGGATCGCCTGTTGTGCTGATCCGCGGCGCAATTTGCCCCCGCTGATGGAACGGTCCAGCAGCTTATTCGCCCAA  
GAGGAAGATTTATTCGTGAAACCTCCTCCACACTGGCGGTGAAAATGGCCTAAACTAGTGGATCCGAATTCGAGCTCGG  
CGCGCTGCAGGTCGACAAGCTTGGCGCCGATAATGCTTAAGTGAACAGAAAAGTAATCGTATTGTACAGGCCGCATA  
ATCGAAATTAACGACTCACTATAGGGGAATTGTGAGCGGATAACAATTCCCATCTTAGTATATTAGTTAAGTATAAG  
AAGGAGATATACATATGGCAGATCTCAATTGGATATCGGCCGGCCACGCGATCGCTGACGTCGGTACCCTCGAGTCTGGT  
AAAGAAACCGCTGCTGCGAAATTTGAACGCCAGCACATGGACTCGTCTACTAGCGCAGCTTAATTAACCTAGGCTGCTGC  
CACCGCTGAGCAATAACTAGCATAACCCCTTGGGGCCTCTAAACGGGTCTTGGGGTTTTTTGCTGAAAGGAGGAATA  
TATCCGATTGGCGAATGGGACGCGCCCTGTAGCGGCGCATAAAGCGCGCGGGTGTGGTGGTTACGCGCAGCGTGACCG  
CTACACTTGCCAGCGCCCTAGCGCCCGCTCCTTTGCTTTCTCCCTTCTTCTCGCCACGTTCCGCCGCTTTCCCGCT  
CAAGCTCTAAATCGGGGGCTCCCTTTAGGGTTCCGATTTAGTGCTTTACGGCACCTCGACCCAAAAAACTTGATTAGGG  
TGATGGTTCACGTAGTGGGCCATCGCCCTGATAGACGGTTTTTCGCCCTTTGACGTTGGAGTCCACGTTCTTTAATAGTG  
GACTCTTGTTCAAAACCTGGAACAACACTCAACCCTATCTCGGTCTATTCTTTGATTTATAAGGGATTTTGCCGATTTTCG  
GCCTATTGGTTAAAAAATGAGCTGATTTAACAATAAATTAACCGCAATTTTAACAAAATATTAACGTTTACAATTTCTGG  
CGGCAGATGGCATGAGATTATCAAAAAGGATCTTACCTAGATCTTTTAAATTAATAAAGGATTTAAATCAATCTA  
AAGTATATAGATAAACTTGGTCTGACAGTTACCAATGCTTAATCAGTGAGGCACCTATCTCAGCAGTCTGTCTATTT  
GTTTATCCATAGTTGCTGACTCCCCGCTGTAGATAACTAGATACGGGAGGGCTTACCATCTGGCCCCAGTGTGCA  
ATGATACCGCGAGACCCACGCTACCGGCTCCAGATTTATCAGCAATAAACCAGCCAGCCGGAAGGGCCGAGCGCAGAAG  
TGGTCTGCAACTTTATCCGCTCCATCCAGTCTATTAATTGTTGCCGGGAAGCTAGAGTAAGTATTCGCCAGTTAATA  
GTTTGGCAACGTTGTTGCCATTGCTACAGGCATCGTGGTGTACGCTCGTCTTTGGTATGGCTTCATTCAGCTCCGGT  
TCCCAACGATCAAGGCGAGTTACATGATCCCCATGTTGTGCAAAAAGCGGTTAGCTCCTTCGGTCTCCGATCGTTGT  
CAGAAGTAAGTTGGCCGAGTGTATCACTCATGGTTATGGCAGCACTGCATAATTCTCTTACTGTCATGCCATCCGTAA  
GATGCTTTTCTGTGACTGGTGAAGTACTCAACCAAGTCACTTGTAGAATAGTGTATGCGGCGACCGAGTTGCTCTTGGCCG  
GCGTCAATACGGGATAATACCGCGCCACATAGCAGAACTTTAAAAGTGTCTCATCTTGGAAAACGTTCTTCGGGGCGAAA  
ACTCTCAAGGATCTTACCGCTGTTGAGATCCAGTTCGATGTAACCCACTCGTGCACCCAAGTATCTCAGCATCTTTTA  
CTTACCAGCGTTTCTGGGTGAGCAAAAACAGGAAGGCAAAAATGCCGCAAAAAGGGAATAAGGGCGACCGGAAATGT  
TGAATACTCACTCTTCTTTTCAATCATGATTGAAGCATTATCAGGGTATTGTCTCATGAGCGGATACATATTTG

AATGTATTTAGAAAAATAAACAAATAGGTCATGACCAAAATCCCTTAACGTGAGTTTTCGTTCCACTGAGCGTCAGACCC  
CGTAGAAAAGATCAAAGGATCTTCTTGAGATCCTTTTTTCTGCGCGTAATCTGCTGCTTGCAAAACAAAAAACCCACCGC  
TACCAGCGGTGGTTTTGTTTGCCGGATCAAGAGCTACCAACTCTTTTTCCGAAGGTAAGTGGCTTCAGCAGAGCGCAGATA  
CCAAATACTGTCTTCTAGTGTAGCCGTAGTTAGGCCACCACTTCAAGAACTCTGTAGCACCCGCTACATACTCTGCTCT  
GCTAATCCTGTTACCAGTGGCTGCTGCCAGTGGCGATAAGTCGTGTCTTACCAGGTTGGACTCAAGACGATAGTTACCGG  
ATAAGGCGCAGCGGTGGGCTGAACGGGGGGTCTGTGCACACAGCCAGCTTGGAGCGAACGACCTACACCGAACTGAGA  
TACCTACAGCGTGAGCTATGAGAAAGCGCCACGTTCCCGAAGGGAGAAAGGCGGACAGGTATCCGGTAAGCGGACGGGT  
CGGAACAGGAGAGCGCACGAGGGAGCTTCCAGGGGAAACGCCTGGTATCTTTATAGTCCTGTCCGGTTTTCGCCACCTCT  
GACTTGAGCGTCGATTTTTGTGATGCTCGTACGGGGGGCGGAGCCTATGGAAAAACGCCAGCAACGCGGCCTTTTTACGG  
TTCCTGGCCTTTTTGCTGGCCTTTTTGCTCACATGTTCTTCTGCGTTATCCCTGATTCTGTGGATAACCGTATTACCGC  
CTTTGAGTGAGCTGATACCCTCGCCGAGCCGAACGACCGAGCGCAGCGAGTCAAGTGTAGCGAGGAAGCGGAAGAGCGCC  
TGATGCGGTATTTTTCTCCTTACGCATCTGTGCGGTATTTACACCCGCATATATGGTGCATCTCAGTACAATCTGCTCTG  
ATGCCGCATAGTTAAGCCAGTATACACTCCGCTATCGCTACGTGACTGGGTATGGCTGCGCCCCGACACCCGCCAACAC  
CCGCTGACGCGCCCTGACGGGCTTGTCTGCTCCCGGCATCCGCTTACAGACAAGCTGTGACCGTCTCCGGGAGCTGCATG  
TGTCAGAGGTTTTACCGTCAACCGAAACGCGCGAGGCAGCTGCGGTAAGCTCATCAGCGTGGTCTGTAAGCGATT  
ACAGATGCTGCTGTTTATCCGCGTCCAGCTCGTTGAGTTTTCTCCAGAAGCGTTAATGCTGCTTCTGATAAAGCGGG  
CCATGTTAAGGGCGGTTTTTCTGTTGGTCACTGATGCCTCCGTGTAAGGGGGATTCTGTTTATGGGGGTAATGATA  
CCGATGAAACGAGAGAGGATGCTCACGATACGGGTTACTGATGATGAACATGCCCGGTTACTGGAACGTTGTGAGGGTAA  
ACAACCTGGCGGTATGGATGCGGCGGGACCAGAGAAAAATCACTCAGGGTCAATGCCAGCGCTTCGTTAATACAGATGTAG  
GTGTTCCACAGGGTAGCCAGCAGCATCCTGCGATGCAGATCCGGAACATAATGGTGCAGGGCGCTGACTCCCGGTTTTCC  
AGACTTTACGAAACACGGAACCCGAAAGACCATTACATGTTGTTGCTCAGGTCGACAGCTTTTGACAGCAGTCCGTTCA  
CGTTCGCTCGCTATCGGTGATTCTTCTGTAACCAAGGAACCCCGCAGCCTAGCCGGGCTCCTCAACGACAGGA  
GCACGATCATGCTAGTATGCTATGCCCCGCGCCACCGAAGGAGCTGACTGGGTTGAAGGCTCTCAAGGCATCGGTGAGAT  
CCCGGTGCCTAATGAGTGAGCTAACTTACATTAATTGCGTTGCGCTCACTGCCCGTTTTCCAGTCGGGAAACCTGTCTGTG  
CCAGCTGCATTAATGAATCGGCCAACGCGCGGGGAGAGGCGGTTTGGTATTGGGCGCCAGGGTGGTTTTTCTTTTACC  
AGTGAGACGGCAACAGCTGATTGCCCTTACCCTGCGCCTGAGAGAGTTGCAGCAAGCGGTCCACGCTGGTTTTGCC  
CAGCAGGCGAAAATCTGTTGATGGTGGTTAACGGCGGGATATAACATGAGCTGTCTTCGGTATCGTCTGATCCCACTA  
CCGAGATGTCCGCACCAACGCGCAGCCGGACTCGGTAATGGCGCGCATTGCGCCAGCGCCATCTGATCGTTGGCAACC  
AGCATCGCAGTGGGAACGATGCCCTCATTAGCATTGTCATGTTTGTGAAAACCGGACATGGCACTCCAGTCCGCTTC  
CCGTTCCGCTATCGGCTGAATTTGATTGCGAGTGAGATATTTATGCCAGCCAGCCAGACGCAGACGCGCCGAGACAGAAC  
TTAATGGGCCCGCTAACAGCGGATTTGCTGGTGACCCAATGCGACCAGATGCTCCACGCCAGTCGCGTACCGTCTTCA  
TGGGAGAAAATAATACTGTTGATGGGTGCTGGTGCAGAGACATCAAGAAATAACGCCGGAACATTAGTGCAGGCAGCTTC  
CACAGCAATGGCATCCTGGTCACTCCAGCGGATAGTTAATGATCAGCCACTGACGCGTTGCGCGAGAAGATTGTGCACCG  
CCGCTTTACAGGCTTCGACGCGCTTCGTTTACCATCGACACCACCACGCTGGCACCCAGTTGATCGGCGCGAGATTTA  
ATCGCCGCGACAATTTGCGACGGCGCGTGCAGGGCCAGACTGGAGGTGGCAACGCCAATCAGCAACGACTGTTTGGCCG  
CAGTTGTTGTGCCACGCGGTTGGGAATGTAATTCAGCTCCGCCATCGCCGCTTCCACTTTTTCCCGGTTTTTCGAGAAA  
CGTGGCTGGCTGGTTACACACGCGGAAACCGTGTGATAAGAGACACCCGCATACTCTGCGACATCGTATAACGTTACT  
GGTTTACATTCACACCTGAATTGACTCTTCCGGGCGCTATCCTGCCATACCGCGAAAGGTTTTGCGCCACTGATG  
GGTGTCCGGATCTCGACGCTCTCCCTTATGCGACTCCTGCATTAGGAAGCAGCCAGTAGTAGGTTGAGGCCGTTGAGC  
ACCGCCGCGCAAGGAATGGTGCATGCAAGGAGATGGCGCCAAACAGTCCCCCGGCCACGGGGCTGCCACCATACCCAC  
GCCGAAACAAGCGCTCATGAGCCCGAAGTGGCGAGCCCGATCTCCCCATCGGTGATGTCGGCGATATAGGCGCCAGCAA  
CCGCACCTGTGGCGCCGGTATGCCGGCCACGATGCGTCCGGCGTAGAGGATCGAGATCGATCTCGATCCCGCGAAATTA  
ATACGACTCACTATA

>pDB060

GGGGAATTGTGAGCGGATAACAATTCCCCTCTAGACCCGGGGGTGATCCGATGCAACTACAATGCCATGCTGGAAGCAGC  
GAGTACGTGACACATGTGCGCAAAGCAGCGATGCCAACTCGTTACGGAAATTTGTTGCCATGCATTTTCGTTGACAAG  
CGATAACAATGAGTATCTCGCGCTGGTGTGAGGGTACGTTTGGCAACGTGAATCAGTACTGACGCGACTGCACTCCGAGT  
GCCTCACCGGTGATGTAAGGATCACTGCGCTGCGATTGTGGTGAACAATTGGACGCCGATTACGCCATATCGCATCT  
GAAGGCGTTGGCGCGCTATTGATTTGCGAGGCCATGAAGGACGCGGCATTGGCTTGTGTAACAAAAATCTTGCATACGG  
ACTCCAAGAACAAGGACTTGACACCGTCGATGCCAATCGCGACCTGGGTTTTGCCGGATGACGCGCGGAGTATGACTGCG  
CGGCGAGCATCGTGCGCCAACTCGGCATCCTGTGCGTACGGCTGATGAGCAACAATCCGGATAAGTTTGAAGCGCTGCAG  
CGCATGGCATTCCAGTATGTGAGCGCGTGGACCTCGCAATTGCATTACCGGAGGAAAAATGAGCGTTATATCTGGACTAA  
GCCAATCGTTTCGGCATTATTTGACGAGAGTGAGCTTCAGTCCCGTTGTCATTGTAGAGGCCATATGAGATGCAA  
TGGTATGCTCCTGTTCTGTCGCCACGCAATACGGGCATCTGGGCGGTGCTGCGGTTGAAAGCGCCTGAGATGCCA  
AAACCCGGTTGTCTGGCCTTTAAGCCATGCTGCGCGCAAGCGTTGTTTTTTCCATGGCCAGTCATGTCATTGGTACG  
TTACGCGCATCGCCTCGGATTGCTTCCCTATTGGTGGTACGCGCTCGGAAAGTACGGCGGAAATGGCCCGGGCAGCCGG  
TGCTGAGATCTTGTGGGGACCACCGGACGAAGGCATGGCGAATGCCTGTTTCGCGAGCGATGGCTCATATTGCGGCAGCAG  
GCGGAGAGCGTGTGATGTTTGTCCCGGTGATTTGCCCTGTTGGATGGGGCGGCCATCGACATGTTGAGCCGTGCACCG  
GTCGATGCGATTGGCATGGCGCCAAACCGGGACGGTATGGCACGAATGGGCTGATTTGCCGACCTGGCGCTATTCCGTT  
GTTTTACGCGGCCAAGCTTTTTCCGCTCATAAAACGCCGCTCGGTGCGCCGAATTGATGTTTGGATTGTCCGTTCAA  
GAGAGTGGGCGTTGGATGTAGACTTGCCGACCTTGAGGAATTCAGTCTTCCATCAAAGACGCCAAGAGGAGGGTG  
CTATGCCAAATCTAGTAAGCAATCTATTTACAAAATGATCCAAGAGGTCGAACGTTCCGCTAAGGGCAGTCAGCCAAGG  
CTAGATGACAAGGCTTTGGCGTATGAGCTTGAAGCGGTGCAAGATTGGCGTGAGTTGGCGGGTCTGGCATCGGCATGGCG  
CGATATCGGTTGGGGCAACGTCATCACCTATTTCGCGCAAGGTTTTTATTCCGCTACCCATCTTTGTGAGATGTTTGGC

ACTACTGCACCTTTGCCAAAGCGCCACGGGTGATTGGCCAAGCATTCTTACCGTGGACCAAGCGCTGGACATTGCGCGG  
GCGGGTGTGTCAGTTGGCTGTCTGAGGCTTTGTTACGCTCGGAGATCGGCCCGAAGCGCGTTATGCCGCTGCACGCGA  
TGCGCTGCAGCAACTGGGTTCATGCTACGACAGCCGACTATGTGCTGAGGTCGCGCAACGCGTACGAGCTGAAAACCGGGC  
TGCTGCCCCACTTTAATATGGGCGTGTAAAGCGCGCAGAATACCAGATGCTGCGGCCCATGCCCTTCCTTCGGGTTG  
ATGCTAGAGACGGCTTCTGAACGCTTTCCGAGCGTGGTGGGCCGATTACGGCTCTCCCATAAGCACCCCGCAGCGCG  
GCTTGAACCGCTTCGCTTGGCGGCAAGCGCATATACCGATCACCTCAGGCATATTGATTGGTATCGGGGAGACACGCC  
GCGAGCGGTTGAATCGCTCTTTGCGCTGCGGGATTGTCATGATCGCTATGGTCATGTGCAGGAGGTCATTATCAGAAC  
TTTCGCGCGAAAACCGGACCAAAAATGGTTAACGCGCCTGAGCCGTCATGGACGAATTGTGTTGGACAACAGCGTTCG  
CCGGTTGGTCTGGGTTCCGCAATGAGCATCCAGGTGCCGCCTAATCTTTTCGACGGTGACTTGACCGATTGATTTCGCG  
CGGGAATCAATGATTGGGGCGGCGTATCGCCGGTCACGCCTGATCACGTTAATCCAGAAGCGCCGTGGCCGCACCTTGAC  
CGCTTAAGTGAGGATACAGACAGGGGCGGGAAGACGTTGACCGAGCGGATAACCGTCTATCCTGCCTATATCGAGGAACG  
TGATCGTTGGATCGACCCGGGCTTGCATGCTGATGTGCTACGCCATTAGATTGCAGTGGATTGGCAACAAGCGATATCT  
GGAAAGCCGGCTCCACGACGATAGGGGATATCGCTTGCTGGCAGTCACTCCCACGGCTTCCAGGTTGATCGTGTGGT  
TCGCAGACGATCGATATCGTCGAGAAAATGCGTGGCGGGTGGAGCGCCTCGAAGAAGCCGAGCTTGTACATTTATTAACGC  
ACGCGGCCATGATTTACGCATGTGACGCACACGGCGGACCGTTTGCAGGAGCAGACAAAGGGCGACACGATCACTTACG  
TTGTCAATCGGAACATCAACTACACCAACGTCTGCCAATACCATTGCAATTTTTGTGCTTTTTACGAGGACCGATACAA  
GAAGACTTGCAGCAAAAAGCCCTATATCGTTGACCTCAACGAAATCCGTCGCCGCGTCAAAGAAGCGTGGGATCGAGGGG  
GACGGAGGTCTGCTTGAAGGGGCGATTACATCCCGACTATACGGGACGTAATCTTGCATCTGCGAAGCGGCTAAAA  
CAGAATGTCCAGACATGCACATTCACGCCTTTTCGCCCCTTGAGGTGCTGCATGGTGCACGACCCTGGGGACGTCATC  
AGCGCTTTTTGTCTGATTTGAAAAGCGCTGGATTAAGTACGTTGCCTGGGACCGCAGCCGAGATCCTGGACGACGAAGT  
GCGGCGACAAAATCTGTCGGATAAGTTGAATACGCAAGAATGGTTGACCGTCGTGCGATCGGCACATGAGTTGGGATTG  
GGACCTTGCACGATCATGTTGCGTATGCGAATCGTATAAGCATTTGGGCGGACATATCCTCAGGCTTGGCGAGCTG  
CAACGTGATACAGGGCGGCTGACTGAGTTTGTCCATTGCCTTTTGTCCATGAGGAAGCGCCATTATTTAAAAAGAAAG  
TGCGCGTACAGGGCCGACTTACGAGAAGCCATTTGATGATGCCGTGGGCGTCTGGCGTTTCATGGCTTGATTGACA  
ATATTCAAACGCTTGGGTGAAAATGGGTGAGCACGGCGCACAGCTTTGCTTGCAGGCGGGGGCTAACGATTGGGCGGT  
ACCCTAATGAATGAATCGATTAGCCGCGCAGCCGGTGCAGCCACGGACAGGAAATGCCGCTGCCGCCATGGAAGCCCT  
GGCCGCCAGACTCGGGCGCAATGCGATGCAGCGTACCCCGCTTTATCGTAACGTCAGTCTGAGCGGCAGCAAGCTTCGC  
ATGCTGCTCCTGCGTGGTGCCTGTGCGATTACTAAGCCGGACGCTTGGTGCCTGGGACGGCCATCAGGCTTGTGAT  
GAAGCGGAACAATGATTGGACCTGCATAGGTGGATCATAGGTGGATTGATGGTGTGGCTTGCATGTTGGCAGCCTCAAT  
CGATGTTGTGATGGCTCTCACGCAGCGCTTCCATCATGGATTACCAAGGTGCTTAATTACCCTATTAATTAGACAGA  
CGCTATTCGGTTTGACACGATCGGAAGGGTATCGGTTTGGGTCAGAGAAATGCTTGATCTTTACGCAGGAAGATAGTGA  
TTACCGTCTGAGCGGTGGTACAGGCACCCCGAAACTGCTGCAGGGTCTGAAACGTTGTTAATAATGAAGAAGTGGCC  
GTGATTGTGAATACCGGTGAAGATACCTGGATTGGTGTGATCTGTATCTGAGTCCGGATGTTGATACCGTGTGTATACCT  
GGCAGATCTGATTAACGAAGAAACCTGGTATGGTGTGAAAGAGGATACCTTTTATACCCACGAACAGCTGAAAAATCTGG  
GCTTTGATGAAGTTCTGCGCATTGGTGATAAAGATCGTGCCTGAAAATGCACAAAACCTATTATCTGAAACGCGGTCAT  
AAACTGAGCGAAGTTGTTGATATGGAAGAAAGTTGCCCTGGGCATTAAGCAAAAAGTTATCCGATGACCGATGATCGTGT  
GGAACCAAAAATCTGGCAAAAAGTTGATGAAAGACGCTGATGCAAAAACCTGCAAAAAGCAGTTGAAAGCAAAAAC  
AGCGACTGGTTATATTGGTCCGAGCAATCCGATTACAGCATCGGTCCGATTCTGAGCCTGAATGGTATTAAGAACT  
GCTGAAAGACAAAAAGTTGTTGTTGTTAGCCGATTGTTGGTAATAGCGCAGTTAGCGGTCCGGCAGGTAAGTATGATGA  
AAGCCAAAGGTTATGATGTTAGCGTGAAGGCATCTACGAGTCTATAAAGATATTGTGGATGTGCTGGTGTGATCGACAAC  
GTGGATAAAGAAATTGCAAAAAGAAATCCGTGCGAAGTGCTGATTACCAATACCATCATGAAAACCTGGATGATAAAGT  
TCGTCTGGCAAAAACATCATTGAATTTTGTGGTAGCCTGTAAGGTTGATGGCTATACAGAAATAAAAAATGATCAATGG  
CATGCGGTACGGCAAACGCTTGTGAACCACTACGAAGAATGCACTATCCACTACGCATGCGCCGCTTTGGGCTTTT  
TTCTCCCTTGTCTCTCGAATTGGCGCGGCGACTGGCAGACAATCGCTGCGCTATTTCCCTATTTGATGGTTTATAAA  
GGGCGCGTCCCTTCGCACTTGCCTGTCTGGTTGCCGAAAACCTCGCTAATCTAGGGGTTCCGGTGGTGTGAAAGCGAT  
TGTCGACCAATTATCAGAAATTGACCGGTTGGCAACGCAGGAATCGTCATTTTCCTTGTCCACGGCGTGAGTTTCTTA  
TTGTCGTTATGCGGTGCTGCGTTTATCAAGCTCGCTTTTTGCTGAGCTGCGTGAAATTATCTTTGAAAAGTGGCTTAC  
AACGCTGCGCGACAAGTGGCACTCGCAGTATCCGGCATCTGCACACGTTGTCGTTGTGTTTTACCTTGAGCGGCAAAAC  
AGGTGGCCTATCGCGGATATTGAGCGAGGCACGCGTGGCGTCAAGACGCTTGTTCATATTCGCTCTATAATATCCTGC  
CAATATGTGTTGAAGTCATATTGGTACTCATTTTTTTGCTATTCGTTACGACATCTATTATACGGTCTGACGCTATCC  
GTGCTTGGCGCTTACATCACGTTTACCCTGATGGTGACAGAATGGCGTACCGGTTAAGGCAGGAGATGAATAAGCTTGA  
TACAGCGCTATGATGAAAGCATGATGCTTTATCATGATGCGGCAGTTCGATCGCAGAAATCGCTTTCGTTTCATGAATCT  
GGCCAGCAGTCGATTATTGCAATCTGCATGATTGCCGTTTATGAGGGGCGACGACGAGGTTGTGGATAAGCAATTGAC  
ATTGGGCGACTTTGTGTTAATCAATACATTTATGTTGCAGATATATATTCGCTGAGTTTTTTGGGGAATATGATCGAA  
CTTTGAAGCAAAGTCTGACCGATATGGATCAGATGTTTTCTTTGTTAAGGCTCAGACGTTGAAGTTGACGATATTCAAGGT  
TCATCTCCGCTTGTGTAAGAAGCGCTGAAGTACGCTTTGAGCATGTCAGTTTTTCATATGAACCGCAACGGCAAAATTT  
GCGGGATGTCACCTTACGATTGCAGCGGGTACGACGACCGCAATTGTCGGACATAGCGGCTCAGGTAAGTCGACACTCG  
CACGGCTGTGCTTCGCTTTTATGATGTAGAGCATGGCGCTGGTCTGATTTTTGATTGATGGCCAAGACATTCGGGCTGTG  
ACGCAAGACTCGCTACGCGCGGCCGTTGGCATTGTGCCGCAAGATACGGTGTCTTCCGTGACACGATCTATTACAATAT  
TGCGTACGGACGGTTGCTGCGTCGCCAGAAGAAGTGATAGCGGCTGCGCGCGCCGCTCATATTCATGCTTTTATTGAAA  
GCTTGCCCGCTGGCTATTCCACTATAGTGGGTGAGCGTGGTTGAAATTATCTGGCGGTGAAAAACAGCGCATCGCAATT  
GCCCGTACCTTGCTAAAAAAGCCGCTATTCTCATTTTTGATGAAGCGACTTCAGCACTCGATTACGTTGCCGAGCGTGC



CGCACCAACGCGCAGCCCGACTCGGTAATGGCGCGCATTGCGCCAGCGCCATCTGATCGTTGGCAACCAGCATCGCAG  
TGGGAACGATGCCCTCATTAGCATTGTCATGGTTTGTGAAAAACCGGACATGGCACTCCAGTCGCCTTCCCGTTCCGCT  
ATCGGCTGAATTTGATTGCGAGTGAGATATTTATGCCAGCCAGCCAGACGCGAGACGAGACAGAATAATGGGCC  
CGCTAACAGCGGATTTGCTGGTGACCCAATGCGACCAGATGCTCCACGCCAGTCGCGTACCGTCTTCATGGGAGAAAA  
TAATACTGTTGATGGGTGTCTGGTCAGAGACATCAAGAAATAACGCCGGAACATTAGTGCAGGCAGCTCCACAGCAATG  
GCATCCGGTCATCCAGCGGATAGTTAATGATCAGCCACTGACGCGTTGCGGAGAAAGATTGTGCACCCGCTTTACA  
GGCTTCGACGCCGCTTCGTTTACCATCGACACCACCGCTGGCACCCAGTTGATCGGCGGAGATTTAATCGCCGCGA  
CAATTTGCGACGCGCGTGCAGGGCCAGACTGGAGGTGGCAACGCCAATCAGCAACGACTGTTGCCCGCCAGTTGTGT  
GCCACGCGGTTGGGAATGTAATTCAGCTCCGCCATCGCCGCTTCCACTTTTTCCCGCGTTTTTCGAGAAAACGTGGCTGGC  
CTGGTTCACCACGCGGGAAACGGTCTGATAAGAGACACCGGCATACTCTGCGACATCGTATAACGTTACTGGTTTCACAT  
TCACCACCTGAATTGACTCTCTTCCGGGCGCTATCATGCCATAACCGGAAAGGTTTTGCGCCATTCGATGGTGTCCGGG  
ATCTCGACGCTCTCCCTTATGCGACTCCTGCATTAGGAAGCAGCCAGTAGTAGGTTGAGGCCGTTGAGCACCGCCGCCG  
CAAGGAATGGTGCATGCAAGGAGATGGCGCCCAACAGTCCCCCGCCACGGGGCTGCCACCATAACCCAGCCGAAACAA  
GCGCTCATGAGCCCGAAGTGGCGAGCCCGATCTTCCCATCGGTGATGTCGGCGATATAGGCGCCAGCAACCGCACCTGT  
GGCGCCGGTATGCCGGCCACGATGCGTCCGGCGTAGAGGATCGAGATCGATCTCGATCCCGCGAAATTAATACGACTCA  
CTATA

>pDB061

CCGACACCATCGAATGGTGCAAAACCTTTCGCGGTATGGCATGATAGCGCCCGGAAGAGAGTCAATTCAGGGTGGTGAAT  
GTGAAACCAGTAACGTTATACGATGTCGACAGATATGCCGGTGTCTTATCAGACCGTTTCCCGCGTGGTGAACCAGGC  
CAGCCACGTTTCTGCGAAAAACGCGGGAAAAAGTGGAAAGCGCGATGGCGGAGCTGAATTACATTCCCAACCGCGTGGCAC  
AACAACGGCGGGCAACAGCTGTTGCTGATTTGGCGTTGCCACTCCAGTCTGGCCCTGCACGCGCGCTCGCAAATTTGTC  
GCGGCGATTAATCTCGCCGATCAACTGGGTGCCAGCTGGTGGTTCGATGGTGAACGAAGCGGCTCGAAGCCCTG  
TAAAGCGCGGGTGCACAATCTTCTCGCGCAACGCGTCAGTGGGTGATCATTAACTATCCGCTGGATGACCAGGATGCCA  
TTGCTGTGGAAGTGCCTGCACTAATGTTCCGGCGTATTTCTTGATGTCTCTGACCAGACACCCATCAACAGTATTATT  
TTCTCCCATGAAGACGGTACGCGACTGGGCGTGGAGCATCTGGTGCATTGGGTCACCAGCAAAATCGCGCTGTTAGCGGG  
CCCATTAAGTTCTGTCTCGGCGCTCTGCGTCTGGCTGGCTGGCATAAATATCTCACTCGCAATCAAATTCAGCCGATAG  
CGGAACGGGAAGGCGACTGGAGTGCCATGTCCGGTTTTCAACAAACCATGCAAATGCTGAATGAGGGCATCGTTCCTACT  
GCGATGCTGGTTGCCAACGATCAGATGGCGCTGGGCGCAATGCGCGCCATTACCGAGTCCGGGCTGCGCGTTGGTGGGA  
TATCTCGGTAGTGGGATACGACGATACCGAAGACAGCTCATGTTATATCCCAGCGTTAACCCACCATCAAACAGGATTTTC  
GCCTGCTGGGGCAAACCAGCGTGGACCGTGTCTGCAACTCTCTCAGGGCCAGGCGGTGAAGGGCAATCAGCTGTTGCC  
GTCTACTGGTGAAGAAAAACCCCTGGCGCCAATACGAAACCGCTCTCCCCGCGCTGGCCGATTCAATTAAT  
GCAGCTGGCAGCAGGTTTCCCGACTGGAAAGCGGGCAGTGAGCGCAACGCAATTAATGTAAGTTAGCTCACTCATTAG  
GCACAATCTCATGTTTACAGCTTATCATCGACTGCACGGTGCACCAATGCTTCTGGCGTCAGGCAGCCATCGGAAGCT  
GTGGTATGGCTGTGCAGGTCGTAATCACTGCATAATTCGTGTCGCTCAAGGCGCACTCCCGTCTGGATAATGTTTTTT  
GCGCCGACATCATAACGGTTCTGGCAAATATTCTGAAATGAGCTGTTGACAATTAATCATCGGCTCGTATAATGTGTGGA  
ATTGTGAGCGGATAACAATTTACACAGGAAACAGCCAGTCCGTTTAGGTGTTTTACGAGCACTTACCAACAAGGACC  
ATAGCATATGAAAATCGAAGAAGGTAACCTGATTAACCGCGATAAAGGCTATAACGGTCTCGTGAAGTCTCGTGAAGCTG  
GATAAATAATGAGAAAGATACCGGAATTAAGTACCGTTGAGCATCCGGATAAATGGAAGAGAAATCCCACAGGTT  
GCGGCAACTGGCGATGGCCCTGACATTATCTTCTGGGCACACGACCGCTTGGTGGCTACGCTCAATCTGGCCTGTTGGC  
TGAAATCACCCCGGACAAAGCGTTCAGGACAAGCTGTATCCGTTTACCTGGGATGCCGTACGTTACAACGGCAAGCTGA  
TTGCTTACCCGATCGCTGTTGAAGCGTTATCGCTGATTTATAACAAAGATCTGCTGCCGAACCCGCCAAAAACCTGGGAA  
GAGATCCCGGCGCTGGATAAAGAAGTGAAGCGAAAGGTAAGAGCGCGCTGATGTTCAACCTGCAAGAACCGTACTTTCAC  
CTGGCCGCTGATTGCTGCTGACGGGGTTATGCGTTCAAGTATGAAAACGGCAAGTACGACATTAAGACGTGGGCGTGG  
ATAACGCTGGCGGAAAGCGGGTCTGACCTTCTGTTGACCTGATTAATAACAAACACATGAATGCAGACACCGATTAC  
TCCATCGCAGAAGCTGCCTTAATAAAGGCGAAACAGCGATGACCATCAACGGCCCGTGGGCATGGTCCAACATCGACAC  
CAGCAAAGTGAATTATGGTGAACGGTACTGCCGACCTTCAAGGGTCAACCATCCAAACCGTTCGTTGGCGTGTGAGCG  
CAGGTATTAACGCCGAGTCCGAACAAAGAGCTGGCAAAAGAGTTCCCTCGAAAATATCTGCTGACTGATGAAGGCTG  
GAAGCGGTTAATAAAGACAAACCGCTGGGTGCCGTAGCGCTGAAGTCTTACGAGGAAGAGTTGGCGAAAGATCCACGTAT  
TGCCGCCACTATGAAAAACGCCAGAAAGGTGAAATCATGCCGAACATCCCGCAGATGTCCGCTTCTGGTATGCCGTGC  
GACTGCGGTGATCAACGCCGCCAGCGGTCGTCAGACTGTGATGAAGCCCTGAAAGACGCGCAGACTAATTCGAGCTCG  
AACAACAACAACAATAACAATAACAACAACCTCGGGATCGAGGGAAGGATTCAGAAAATCTTTATTTTCAAGGTCATCA  
TCATCATCATATAGCAGCGGATGGCAGATACCAGCCGCTGTAATGCAAAAACAGCTGGAACGTTCTGAATGCCAAAA  
GCACCCGTACACTGATTAATGATGAGCCGTTTTAGACCTTTCTGTTTAAAACCAATGGTAAACTGGGCAACAAA  
TTTTCTGCGTGGCACCGAAGTTGGTATTCTGACCACCATGGTTCGTAAGGCGGTGAACCGCGTGATACACCGCTGCTGTT  
TCTGCAAGAAGTTCGCTGATTGTTCTGGTTGCAAGCCAAGGTGGTCTGCAACCAATCCGATGTGGTATCTGAATCTGA  
AAGCAAATCCGAAAGTTACCTTTCAGACCCGTAGCGAAAAACTGGCACTGGTTGCCCGTGAAGCAACCGATGCAGAACGT  
GATGAATATTGGCCGAAACTGGATGCAATGTATCCGGATTTTGCAAACTATCGTAGCTATAACCGATCGAAAATTCGGAT  
TGTTATTTGCGATCCGGCATAAGTGCACCTGCAGGCAAGCTTGGCACTGGCCGTCGTTTTACAACGTCGTGACTGGGAAA  
ACCCTGGCGTTACCAACTTAATCGCCTTGCAGCACATCCCCCTTTCGCCAGCTGGCGTAATAGCGAAGAGGCCCGCACC  
GATCGCCCTTCCAAACAGTTGCGCAGCCTGAATGGCGAATGGCAGCTTGGCTGTTTTGGCGGATGAGATAAGATTTTCAG  
CCTGATACAGATTAATCAGAACGCAGAAGCGGTCTGATAAAACAGAATTTGCCTGGCGGCAGTAGCGCGGTGGTCCCAC  
CTGACCCCATGCCGAATCAGAAGTGAACGCCGTAGCGCCGATGGTAGTGTGGGGTCTCCCCATCGGAGAGTAGGGAAC  
TGCCAGGCATCAAATAAAACGAAAGGCTCAGTCGAAAGACTGGGCCCTTTCGTTTTATCTGTTGTTTGTGCGGTGAACGCTC  
TCCTGAGTAGGACAAATCCGCCGGGAGCGGATTTGAACGTTGCGAAGCAACGGCCCGGAGGGTGGCGGGCAGGACGCCCC



CCATAAACTGCCAGGCATCAAATTAAGCAGAAGGCCATCCTGACGGATGGCCTTTTTGCGTTTTCTACAAACTCTTTTGT  
TATTTTTCTAAATACATTCAAATATGTATCCGCTCATGAGACAATAACCCTGATAAATGCTTCAATAATATTGAAAAAGG  
AAGAGTATGAGTATTCAACATTTCCGTGTCGCCCTTATTCCTTTTTTTCGGCATTTCCTTCTGTTTTGCTCACCC  
AGAAACGCTGGTAAAGTAAAGATGCTGAAGATCAGTTGGGTGCACGAGTGGGTTACATCGAACTGGATCTCAACAGCG  
GTAAGATCCTTGAGAGTTTTTCGCCCCGAAGAAGCTTTCCCAATGATGAGCACTTTTAAAGTTCTGCTATGTGGCGCGGTA  
TTATCCCGTGTGACGCCGGGCAAGAGCAACTCGGTCGCCGCATACACTATTCTCAGAATGACTTGGTTGAGTACTACC  
AGTCACAGAAAAGCATCTTACGGATGGCATGACAGTAAGAGAATATGCAAGTGGCTGCCATAACCATGAGTATAACACTG  
CGGCCAACTTACTTCTGACAACGATCGGAGGACCGAAGGAGCTAACCCTTTTTTGCACAACATGGGGGATCATGTAAC  
CGCCTTGATCGTTGGGAACCGGAGCTGAATGAAGCCATACCAAACGACGAGCGTGACACCACGATGCCTGTAGCAATGGC  
AACAACTTTCGCAAACATTAATACTGGCGAACTACTTACTCTAGCTTCCCGGCAACAATTAATAGACTGGATGGAGGCGG  
ATAAAGTTGCAGGACCCTTCTGCGCTCGGCCCTTCCGGCTGGCTGGTTTATTGCTGATAAATCTGGAGCCGGTGAGCGT  
GGGTCTCGCGGTATCATTGCAGCACTGGGGCCAGATGGTAAGCCCTCCCGTATCGTAGTTATCTACACGACGGGGAGTCA  
GGCAACTATGGATGAACGAAATAGACAGATCGCTGAGATAGGTGCCTACTGATTAAGCATTGGTAACTGTCAGACCAAG  
TTACTCATATATACTTTAGATTGATTTACCCCGTTGATAATCAGAAAAGCCCCAAAAACAGGAAGATTGTATAAGCAA  
ATATTTAAATGTAAACGTTAATATTTTGTAAAATTCGCGTTAAATTTTTGTAAATCAGCTCATTTTTTAACCAATAG  
GCCGAAATCGGCAAAATCCCTTATAAATCAAAAAGAAATAGACCGAGATAGGGTTGAGTGTGTTCCAGTTTGGAAACAAG  
TCCACTATTAAGAACGTGGACTCCAACGTCAAAGGGCGAAAAACCGTCTATCAGGGCGATGGCCACTACGTGAACCAT  
CACCCAAATCAAGTTTTTTGGGGTGCAGGTGCCGTAAAGCACTAAATCGGAACCCTAAAGGGAGCCCCGATTTAGAGCT  
TGACGGGAAAGCCGGCGAACGTGGCGAGAAAGGAAGGGAAAGAAAGCGAAAGGAGCGGGCGCTAGGGCGCTGGCAAGTGT  
AGCGGTACGCTGCGGTAACCACCACACCCGCCGCGTTAATGCGCCGCTACAGGGCGCGTAAAAGGATCTAGGTGAAG  
ATCCTTTTTGATAATCTCATGACCAAAATCCCTTAACTGAGTTTTCGTTCCACTGAGCGTCAGACCCCGTAGAAAAGAT  
CAAAGGACTTCTTGAGATCCTTTTTTCTGCGCGTAATCTGCTGTGCAAAACAAAAAACCCAGCTACCCGCTGG  
TTTTGTTGCCGATCAAGAGATCAACACTCTTTTCCGAAGGTAAGTGGCTTACGACAGAGCGCAGATACCAAATACCTGTC  
CTTCTAGTGTAGCCGTAGTTAGGCCACCCTTCAAGAACTCTGTAGCACCCTACATACCTCGCTCTGCTAATCCTGTT  
ACCAGTGGCTGCTGCCAGTGGCGATAAGTCGTGCTTACCAGGTTGGACTCAAGACGATAGTTACCGGATAAGGCGCAGC  
GGTGGGCTGAACGGGGGTTCTGTGCACACAGCCAGCTTGGAGCGAACGACCTACACCGAACTGAGATACCTACAGCGT  
GAGCTATGAGAAAGCGCCACGCTTCCCGAAGGGAGAAAGGCGGACAGGTATCCGGTAAGCGGCAGGGTCGGAACAGGAGA  
GCGCAGGAGGGAGCTTCCAGGGGAAACGCCTGGTATCTTTATAGTCTGTGCGGTTTCGCCACCTGACTTGAGCGTC  
GATTTTTGTGATGCTCGTCAGGGGGCGGAGCCTATGGAAAACGCCAGCAACGCGGCCCTTTTACGGTTCCTGGCCTTT  
TGCTGGCCTTTTGTGCTACATGTTCTTCTGCGTTATCCCTGATTCTGTGGATAACCGTATTACCGCCTTTGAGTGAGC  
TGATACCGCTCGCCGACCCGAACGACCGAGCGCAGCGAGTCAAGTGAAGCGAGGAAGCGGAAGAGCGCCTGATGCGGTATT  
TTCTCCTTACGCATCTGTGCGGTATTTACACCCGCATATATGGTGCCTCTCAGTACAATCTGCTCTGATGCCGCATAGT  
TAAGCCAGTATACACTCCGCTATCGCTACGTGACTGGGTCTGCGCCCCGACACCCGCCAACACCCGCTGACCGCGC  
CCTGACGGGCTTGTCTGCTCCCGCATCCGCTTACAGACAAGCTGTGACCGTCTCCGGGAGCTGCATGTGTCAGAGGTTT  
TCACCGTCATCACCGAAACGCGCGAGGCGAGCTGCGGTAAGCTCATCAGCGTGGTCTGTCAGCGATTACAGATGTCTGC  
CTGTTTCATCCGCTCCAGCTCGTTGAGTTTCTCCAGAAGCGTTAATGTCTGGCTTCTGATAAAGCGGGCCATGTTAAGGG  
CGGTTTTTCTGTTTGGTCACTGATGCCTCCGTGAAGGGGATTTCTGTTTATGAGGGGTAATGATACCCGATGAAACGA  
GAGAGTACTCTACGATACGCGTTACTGATGATGAACGATGCCCCGTTACTGGAACGTTGTGAGGGTAAACAACACTGCGGT  
ATGGATGCGGCGGGACCAGAGAAAAATCACTCAGGGTCAATGCCAGCGCTTCGTTAATACAGATGTAGGTGTTCCACAGG  
GTAGCCAGCAGCATCCTGCGATGCAGATCCGGAACATAATGGTGCAGGGCGCTGACTTCCGCGTTTCCAGACTTTACGAA  
ACACGGAAACCGAAGACCATTATGTTGTTGCTCAGGTGCGCAGACGTTTTGCAGCAGCAGTCGCTTACGTTGCTCGCG  
TATCGGTGATTCACTGCTAACCAGTAAGGCAACCCCGCCAGCCTAGCCGGTCTCAACGACAGGAGCAGCATATGC  
GCACCCGTGGCCAGGACCCAACGCTGCCCCAAAT

>pDB065

GGGGAATTGTGAGCGGATAACAATTCCCCTGTAGAAATAATTTGTTTAACTTTAATAAGGAGATATACCATGCGTGTGG  
CTCTGCTGGGCGTACGGGCAACCTGGGCAAAGTCTGGCACTGCGTCTGGCAACCCTGGGTATGAAATCGTGGTTCGGC  
TCACGTGCGAAGAAAAAGCGGAAGCCAAAGCGGCCGAATATCGTGCATTTGCAGGCGATGCTTCGATCACCGGTATGAA  
AAACGAAGACGCAGCTGAAGCGTGCATATTGCCGTGCTGACCATCCCGTGGGAACATGCAATTGACACGGCTCGTGATC  
TGAAAAATATTCTGCGGAAAAAATCGTTGTTAGTCCGCTGGTGCCGTTTCCCGTGGTGCCAAAGGTTTTACCTACAGC  
TCTGAACGCTCAGCGCCGAAATGTTGCCGAAGTCTGGAAAGCGAAAAAGTCTGTGCTGCCCTGCACACGATCCCGGC  
AGCTCGTTTTGCAAACCTGGATGAAAAATTCGACTGGGATGTCCCGGTGTGTGGCGATGACGATGAAAGCAAAAAAGTTG  
TCATGTCATGATTTTCGAAATGATGGTCTGCGTCCGCTGGATGCCGCTCCGCTGAGTAATTCGCTGAGTAAATTCGCTG  
CTGACCCGCTGATTCTGAACATTATGCGTTTTAACGTTATGGGCAACTGGGATGGGTATCAAATTTCTGTGAGGATCCGAAT  
CGAGCTCGGCGCGCTGACGTCAGTCAAGCTTGCAGCCGCATAATGCTTAAAGTCAACAGAAAGTAATCGTATTGTACAC  
GGCCGCATAATCGAAATTAATACGACTCACTATAGGGGAATTTGAGCGGATAACAATTCCTTCTAGTATATTAGTT  
AAGTATAAGAAGGAGATATACATATGGCAGATCTCAATTTGGATATCGGCCGGCCACGCGATCGCTGACGTCGGTACCCTC  
GAGTCTGGTAAAGAAACCGCTGCTGCGAAATTTGAACGCCAGCACATGGACTCGTCTACTAGCGCAGCTTAATTAACCTA  
GGCTGCTGCCACCGCTGAGCAATAACTAGCATAACCCCTTGGGGCCTCTAAACGGGTCTTGGAGGGTTTTTTGCTGAAAC  
CTCAGGCATTTGAGAAGCACACGGTCACTGCTTCCGGTAGTCAATAAACCGGTAACCCAGCAATAGACATAAGCGGCT  
ATTTAACGACCCTGCCCTGAACCGACGACCGGGTCACTGCGGCCGATCTTGCAGCCCTCGGCTTGAACGAATTTGTTAG  
ACATTATTTGCCGACTACCTTGGTGATCTCGCTTTACGTTAGTGGACAAATTTCTCCAAGTATGCTGCGCGCAGGCCA  
AGCGATCTTCTTGTCCAAGATAAGCCTGTCTAGCTTCAAGTATGACGGGCTGATACTGGGCCGGCAGGCGCTCCATT  
GCCAGTCCGCGAGCAGATCCTTCCGGCGGATTTTCCGGTACTGCGCTGTACCAATGCGGGACAACGTAAGCACTAC  
ATTTGCTCATCGCCAGCCAGTCCGGCGGCGAGTTCCATAGCGTTAAGGTTTCATTTAGCGCCTCAAATAGATCCTGTT

CAGGAACCGGATCAAAGAGTTCCTCCGCCGCTGGACCTACCAAGGCAACGCTATGTTCTCTTGCTTTTGTGTCAGCAAGATA  
GCCAGATCAATGTCGATCGTGGCTGGCTCGAAGATACCTGCAAGAATGTCATTGCGCTGCCATTCTCCAAATTGCAGTTC  
GCGCTTAGCTGGATAACGCCACGGAATGATGTCGTCGTGACACAACAATGGTGACTTCTACAGCGCGGAGAATCTCGCTCT  
CTCCAGGGGAAGCCGAAGTTTCCAAAAGGTCGTTGATCAAAGCTCGCCGCGTTGTTTCATCAAGCCTTACGGTCACCGTA  
ACCAGCAAATCAATATCACTGTGTGGCTTCAGGCCGCCATCCACTGCGGAGCCGTACAAATGTACGGCCAGCAACGTCGG  
TTCGAGATGGCGCTCGATGACGCCAATACCTCTGATAGTTGAGTCTGATCACTTTCGGCGATCACCCTCCCTCATACTCT  
TCCTTTTCAATATTGAAGCATTATACGGGTTATTGTCTCATGAGCGGATACATATTTGAATGTATTAGAAAAAT  
AAACAAATAGCTAGCTCACTCGGTCGCTACGCTCCGGGCGTGAGACTGCGGCGGGCGCTGCGGACACATACAAAGTTACC  
CACAGATCCGTTGGATAAGCAGGGGACTAACATGTGAGGCAAAACAGCAGGGCCGCGCCGGTGGCGTTTTTCCATAGGCT  
CCGCCCTCTGCCAGAGTTCACATAAACAGACGCTTTTCCGGTGCATCTGTGGGAGCCGTGAGGCTCAACCATGAATCTG  
ACAGTACGGGCGAAACCCGACAGGACTTAAAGATCCCCACCGTTTCCGGCGGGTGCCTCCCTCTTGCGCTCTCTGTTC  
GACCCTGCCGTTTACCGGATACCTGTTCCGCCTTTCTCCCTTACGGGAAGTGTGGCGCTTTCTCATAGCTCACACACTGG  
TATCTCGGCTCGGTGTAGGTCGTTCCGCTCCAAGCTGGGCTGTAAGCAAGAACTCCCCGTTACGCCGACTGCTGCGCTT  
ATCCGGTAACTGTTCACTTGAGTCCAACCCGAAAAGCACGGTAAAACGCCACTGGCAGCAGCCATTGGTAACTGGGAGT  
TCGCAGAGGATTTGTTTAGCTAAACACGCGGTTGCTCTTGAAGTGTGCGCCAAAGTCCGGCTACACTGGAAGGACAGATT  
TGTTGTGCTGCTCTGCGAAAGCCAGTTACCACGGTAAAGCAGTCCCAACTGACTTAACTTCGATCAAACCACCTCC  
CCAGGTGGTTTTTTCGTTTACAGGGCAAAAGATTACGCGCAGAAAAAAGGATCTCAAGAAGATCCTTTGATCTTTTCTA  
CTGAACCGCTAGATTTCACTGCAATTTATCTTTCAAATGTAGCACCTGAAGTACAGCCCATACGATATAAGTTGTAA  
TTCTCATGTTAGTCATGCCCGCGCCACCAGGAGGAGCTGACTGGGTTGAAGGCTCTCAAGGGCATCGGTGAGATCCC  
GGTGCCTAATGAGTGAGCTAACTTACATTAATTGCGTTGCGCTCACTGCCCCGTTTCCAGTCGGGAAACCTGTGCGTCCA  
GCTGCATTAATGAATCGGCAACGCGCGGGAGAGGCGGTTTGGCGTATTGGGCGCCAGGGTGGTTTTTCTTTTACCAGT  
GAGACGGGCAACAGCTGATTCGCCCTACCCGCTGACGAGAGTTGAGAGAGTTGACAGCAAGCGGTCCACGCTGGTTTGGCCAG  
CAGGCGAAAACTCTGTTGATGGTGGTTAACGGCGGGATATAACATGAGCTGTCTTCGGTATCGTCGATCCCACTACCG  
AGATGTCCGACCAACGCGCAGCCGACTCGGTAATGGCGCGCATTGCGCCAGCGCCATCTGATCGTTGGCAACCAGC  
ATCGCAGTGGGAACGATGCCCTCATTACGATTTGCATGGTTGTTGAAAAACCGGACATGGCACTCCAGTCGCTTCCCG  
TTCCGCTATCGGCTGAATTTGATTGCGAGTGAGATATTTATGCCAGCCAGCCAGACGCAGACGCGCCGAGACAGAACTTA  
ATGGGCCCCGCTAACAGCGGATTTGCTGGTGACCAATGCGACCAGATGCTCCACGCCAGTCGCGTACCGTCTTCATGG  
GAGAAAATAATACTGTTGATGGGTGCTGGTCAGAGACATCAAGAAAATAACGCCGGAACATTAGTGCAGGCAGCTTCCAC  
AGCAATGGCATCCTGGTATCCAGCGGATAGTTAATGATCAGCCACTGACGCGTTGCGCGAGAAGATTGTGCACCGCCG  
CTTTACAGGCTTCGACGCCGCTTCGTTCTACCATCGACACCACCGCTGGCACCCAGTTGATCGGCGGAGATTTAATC  
GCCGCGACAATTTGCGACGGCGCTGACGGGCCAGACTGGAGGTGGCAACGCCAATCAGCAACGACTGTTTGGCCGCCAG  
TTGTTGTGCCACGCGGTTGGGAATGTAATCAGCTCCGCCATCGCCGCTTCCACTTTTCCCGCGTTTTTCGAGAAAACGT  
GGCTGGCCTGGTTCACCACGCGGAAACGGTCTGATAAGAGACACCGGCATACTCTGCGACATCGTATAACGTTACTGGT  
TTCACATTCACCACCCTGAATTGACTCTCTTCCGGGCGCTATCATGCCATACCAGGAAAGTTTTGCGCCATTTCGATGGT  
GTCCGGATCTCGACGCTCTCCCTTATGCGACTCCTGCATTAGGAAATTAATACGACTCACTATA

>pDB070

GGGGAATTGTGAGCGGATAACAATTCCCCTCTAGACCCGGGGGTGATCCGATGCAACTACAATGCCATGCTGGAAGCAGC  
GAGTACGTGACACATGTCGCAAAAGCAGCGATGCCAATCGTTACGGAATTTTGTGCCCATGCATTTTCGTTTCGACAAG  
CGATAACAATGAGTATCTCGCGCTGGTGTGAGGGTACGTTTGCACCGTGAATCAGTACTGACGCGACTGCACTCCGAGT  
GCCTCACCGGTGATGTAAGGATCACTGCGCTGCGATTGTGGTGAACAATTGGACGCCGATTACGCCATATCGCATCT  
GAAGGCGTTGGCGCGCTATTGTAATTTGCGAGGCCATGAAGGACGCGGCATTGGCTTGTGTAACAAAAATTTTGCATACGG  
ACTCCAAGAACAAGGACTTGACACCGTCGATGCCAATCGCGACCTGGGTTTGGCGGATGACGCGCGGAGTATGACTGCG  
CGGCGAGCATCGTGCGCCAATCGGCATCCTGTCGGTACGGCTGATGAGCAACAATCCGGATAAGTTTGAAGCGCTGCAG  
CGCCATGGCATTCCAGTATGTGAGCGCGTTGACCTCGCAATTGCATTACGCGAGGAAAAATGAGCGTTATATCTGGACTAA  
GCGCAATCGTTTCCGGCATTATTTTACGAGAGTGAGCTTACGTCGCGTTGTCATTGTAGAGGCCTATATGAGATGCAA  
TGGTATGAACTGCGGCATCAAAATGAAAGTGATTATCCGGTTAGCCGATCAATAGCCTGAAAACCCGCTCTGAGCGAAT  
TTCTGAGCGGTGAAGAACGTAATAATCTGCTGCTGAATATGCTGAAGGATATCATTAAAGCACTGGATGGTCTGGATATT  
GTTATTGTTAGCCGTGATGAAGAGATCCTGGATTTTGCAAAAATGAACTGAAAAGCCGAAACCATCAAAGAGAAATACAA  
AGGCCTGAACAACGCAATCAAACAGGCGTTTGAAGAAATCGAAGATAAAGAGGTGATTATCATTCCGGCAGATATCCCG  
TGATCAAAAAAAGCACATCGAGGACATTCTGAAGCTGAGCAAAAATATGATCTGATTATTGCACCGAGCCGTGGTGGT  
GGCACCATCTGCTGATCTGAAAAGCAAAGATCTGATCGAGATCAAATATGAGGGCTTACGCTTTCTGAAAACATCTGGA  
AGAAGCAAAAAACGCAATCTGCGCTATTATATCTATGATAGCTTCTGATTAGCGTGGATATCAATACACCCGGAAGATC  
TGGGTGAAATCTTTATTCATGGCAACGATACCTACACCAAAAACTGAAAAGCCTGGGTATTGATGTGGAACCGAAA  
CATTCAAGCGCAGGTCGTTTTGTTGTTAAACGTCGTTAATGCCGACCTTGGGAATTCGAGTCTCCATCAAAGACGCCA  
AGAGGAGGGTGTATGCCAAATCTAGTAAGCAATCCTATTTACAAAATGATCCAAGAGGTGCAACGTTCCGCTAAGGGCA  
GTCAGCCAAGGCTAGATGACAAGGCTTTGGCGTATGAGCTTGAAGCGGTGCAAGATTGGCGTGAGTTGGCGGGTCTGGCA  
TCGGCATGGCGGATATCGGTTGGGGCAACGTCATCACCTATTCGCGCAAGGTTTTTATTCCGCTCACCCATCTTTGTGCG  
AGATGTTTGCCTACTGACCTTTGCCAAAGCGCCACGGGTGATTGGCCAAGCATTCTTACCCTGGACCAAGCGCTGG  
ACATTGCGCGGGCGGGTGTGCTGAGTTGGCTGTCGTGAGGCTTTGTTTACGCTCGGAGATCGGCCCAAGCGCGTTATGCC  
GCTGCACGCGATGCGCTGCAGCAACTGGGTCATGCTACGACAGCCGACTATGTCGCTGAGGTGCGCAACGCGTACGAGC  
TGAAACCGGGCTGCTGCCCACTTTAATATGGGCGTGTAAGCGCGGCAGAATACCAGATGCTGCGGCCCATGCCCTT  
CCTTCGGTTGATGCTAGAGACGGCTTCTGAACGCTTTCCGAGCGTGGTGGGCCGATTACGGCTCTCCGATAAGCAC  
CCGGCAGCGCGGCTTGAACGCTTCGCTTCCGGCGAAGCGCATATACCGATCACCTCAGGCATATTGATTGGTATCGG  
GGAGACACGCCGCGAGCGGCTTGAATCGCTCTTTGCGCTGCGGGATTTGCATGATCGCTATGGTCAATGTGCAGGAGGTCA

TTATTCAGAACTTTCGCGCGAAACCCGGCACCAAAATGGTTAACGCGCCTGAGCCGTC AATGGACGAATTGTGTTGGACA  
ACAGCGGTCGCCCCGGTTGGTCCTGGGTTCCGCAATGAGCATCCAGGTGCCGCTAATCTTTTCGACGGTGACTTGACCGA  
TTTGATTTCGCGCGGGAATCAATGATTGGGGCGGGGATCGCCGGTCACGCCTGATCACGTTAATCCAGAAGCGCCGTGGC  
CGCACCTTGACCGCTTAAGTGAGGATACAGACAGGGGGCGGGAAGACGTTGACCGAGCGGATAACCGTCTATCTGCCTAT  
ATCGAGGAACGTGATCGTTGGATCGACCCGGGCTTGCATGCTGATGTGCTACGCCATTCAGATTGCAGTGGATTGGCAAC  
AAGCGATATCTGGAAGACCGGGCTCCACGACGATAGGGGATATCGCTTGCCTGGCAGTCACTCCCACGGCTTCCCAGTTG  
ATCGTGTGTGGTTTCGACAGCGATCGATATCGTTCGAGAAATGCTGGCGGGTGAGCGCCTCGAAGAAGCCGAGCTTGTACAT  
TTATTTAACGCACGCGGCCATGATTTTACGCATGTGACGCACACGGCGGACCGTTTGCAGGACAGACAAAGGGCGACAC  
GATCACTTACGTTGTCAATCGGAACATCAACTACACCAACGCTCTGCCAATACCATTGCAATTTTTGTGCTTTTTACGAG  
GACCGATACAAGAAGACTTGCAGGAAAAGCCCTATATCGTTGACCTCAACGAAATCCGTCGCGCGCTCAAAGAAGCGTGG  
GATCGAGGGGGCGACGGAGGTCTGCTTGAAGGGGGCATTCACTCCGACTATACGGGACGTACTTATCTTGACATCTGCGA  
AGCGGCTAAAACAGAATGTCCAGACATGCACATTCACGCCTTTTCGCCCTTGAGGTGCTGCATGGTGCCACGACCCCTGG  
GGACGTCAATCAGCGCTTTTTGTCTGATTGAAAAGCGCTGGATTAAGTACGTTGCCCTGGGACCGCAGCCGAGATCCTG  
GACGACGAAGTGCGGCGACAAATCTGTCCGATAAGTTGAATACGCAAGAATGGTTGACCGTCGTGCGATCGGCACATGA  
GTTGGGATTGCGGACCACTTGCACGATCATGTTCCGGTCATGTCGAAATCGTATAAGCATTGGGCGCGACATATCCTCAGGC  
TTGCCGAGCTGCAACGTGATACAGGCGGGCTGACTGAGTTTGTCCATTGCCTTTTGTCCATGAGGAAGCGCCATTATTT  
AAAAAGAAAGGTGCGCGTCAGGGGGCCGACTTACGAGAAGCCATTTGATGCATGCCGTCGGGCGTCTGGCGTTTCATGG  
CTTGATTGACAATATTCAAACGCTTGGGTGAAAATGGGTGAGCACGGCGCACAGCTTTGCTTGACGGCGGGGGCTAACG  
ATTTGGGCGGTACCCTAATGAATGAATCGATTAGCCGCGCAGCCGGTGCAGCCACGGACAGGAAATGCCGCTGCCGCC  
ATGGAAGCCCTGGCCCGCAGACTCGGGCGCAATGCGATGCAGCGTACCCCGCTTTATCGTAACGTCAGTCTGAGCGGCA  
GCAAGCTTCGATGCTGCTCCTGCGCTGGTGCCTGTGCGATTCACTAAGCCGGACGCTTGGTGGTGGGACGGCCATC  
AGGCTTGAGTGAAGCGGAACAATGATTGGACCTGCATAGGTGATCATAGGTGGATTTCATGGTGGCTTGCATTTGG  
CAGCCTCAAATCGATGTTGTGATGGCTCTCACGACGCGCTTCCCATCATGGATTACCAAGGTGCTTAATTACCTATTA  
AATTAGACAGACGCTATTTCGGTTTGACACGATCGGAAGGGTGATCGGTTTGGGTGAGAGAAATGCTTGATCTTACGCAG  
GAAGATAGTGATTACCGTCTGAGCGGTGGTACAGGCACCCGAAACTGCTGCAGGGTCTGAAACGTTGTGTTAATAATG  
AAGAAGTGGCCGTGATTGTGAATACCGGTGAAGATACCTGGATTGGTGATCTGTATCTGAGTCCGGATGTTGATACCGTG  
CTGTATACCCTGGCAGATCTGATTAACGAAGAAACCTGGTATGGTGTGAAAGAGGATACCTTTTATACCCACGAACAGCT  
GAAAAATCTGGGCTTTGATGAAGTCTGCGCATTGGTGATAAAGATCGTGCAGTAAAATGCACAAAACCTATTATCTGA  
AACGCGGTCATAAACTGAGCGAAGTTGTTGATATGGAAAAAGTTGCCCTGGGCATTAAGCAAAAAGTTATCCGATGACC  
GATGATCGTGTGAAACCAAAATCTGGCAAAAAGTTGATGGTAAAGTGGACCTGCTGAAATTCCATGATTTTTGGGTTAA  
ACGCAAAGGTGATGTTGAAGTGTGGATGTGATTTATGAAAACAGCCTGTATGCAAAACCGTGCGAAAAAGCAGTTGAAG  
CCATTA AAAACAGCGATCTGGTTATTATTGGTCCGAGCAATCCGATTACCAGCATCGGTCCGATTCTGAGCCTGAATGGT  
ATTAAGAAGTCTGAAAGACAAAAAAGTTGTTGTGGTTAGCCCGATTGTTGGTAATAGCGCAGTTAGCGGTCCGGCAGG  
TAAACTGATGAAAGCCAAAGGTTATGATGTTAGCGTGAAAGGCATCTACGAGTTCTATAAAGATATTGTGGATGTGCTGG  
TGATCGACAACGTGGATAAAGAAATTCGAAAAGAAATCCGTGCGAAGTGTGATTACCAATACCATCATGAAAACCCCTG  
GATGATAAAGTTCGCTCTGGCCAAAAACATCATTGAATTTTGTGGTAGCCTGTAAGGTTGATGGCTATACAGAAATAAAAA  
ATGATCAATGGCATGCGGTACGCAACACGCTTGTGTAACCCTACAGAAAGTGCATATCCACTACGATCGCCCGCCT  
TTGGGCTTTTGTTCCTTCCCTTGCCTTTCGAACTTTCGAACTTGGCGCGGCGACTGGCAGACAAATCGCTGCTATTTCCTATTTGA  
TGTTTATAAAGGGCGCGTGCCTTTCGCACTTGCCTGTCTGGTTGCCGCAAAACTCGCTAATCTAGGGGTTCCGGTGGTG  
ATGAAAGCGATTGTCGACCAATTATCAGAAATTGACCGGTTGGCAACGCAGGAATCGTCATTTTCCTTGTTCACGGCGT  
GAGTTTTCTTATTGTCGCTTATGCGGTGCTGCGTTTATCAAGCTCGCTTTTTGCTGAGCTGCGTGA AATTATCTTTGGAA  
AAGTGGCTTACAACGCTGCGCGACAAGTGGCACTCGCAGTATTCCGGCATCTGCACACGTTGTCGTTGTGTTTTACCTT  
GAGCGGCAACAGGTGGCCTATCGCGGATATTGAGCGAGGCACGCTGGCGTCAAGACGCTTGTTCATATTGCTCTA  
TAATATCCTGCCAATATGTGTTGAAGTCATATTGGTACTCATTTTTTTTTGCTATTTCGTTACGACATCTATTATACGGTCG  
TCACGCTATCCGTGCTTGC GGCTTACATCAGTTTACCGTGATGGTGACAGAATGGCGTACGCGTTAAGGCAGGAGATG  
AATAAGCTTGATTACGCTCCAATACGCTAATGGTTGATTGCTTATTAATTACGAGACAGTCAAGA AACTTTGGTAACGA  
GCAACACGAAGTACAGCGCTATGATGAAAGCATGATGCTTTATCATGATGCGGCAGTTCGATCGCAGAAAATCGCTTTTCGT  
TCATGAATCTTGCCAGCAGTCGATTATTGCAATCTGCATGATTGCCGTTTTATGGAGGGCGACGCAGCAGGTTGTGGAT  
AAGCAATTGACATTGGGCGACTTTGTGTTAATCAATACATTTATGTTGCAGATATATATCCGCTGAGTTTTTTGGGGAA  
TATGTATCGAACTTTGAAGCAAAGTCTGACCGATATGGATCAGATGTTTTCTTTGTTAAGGCTCAGACGTGAAGTTGACG  
ATATTCAAGGTTTCATCTCCGCTTGTGTAAGAAGCGCTGAAGTACGCTTTGAGCATGTCAGTTTTTCATATGAACCGCAA  
CGGCAAATTTGCGGGATGTCACCTTACGATTGACGCGGTACGACACCGCAATTGTCGGACATAGCGGCTCAGGTTAAG  
TTCGACACTCGCACGGCTGTTGCTTCGCTTTTATGATGTAGAGCATGAGCGCTGGTGGTATTTGATTGATGGCCAAGACA  
TTCGGGCTGTGACGCAAGACTCGCTACGCGCGGCCGTTGGCATTGTGCCGCAAGATACGGTGTCTTTCCGTGACAGCAT  
TATTACAATATTGCGTACGACGCTTGTCTGCGTCCGAGAAAGTATAGCGGCTGCGCGCGCCGCTCATATTTCATGC  
TTTTATTGAAAAGCTTGGCCGCTGGCTATTTCCACTATAGTGGGTGAGCGTGGTTTTGAAATTAATCTGGCGGTGAAAAACAGC  
GCATCGCAATTGCCCGTACCTTGCTAAAAAAGCCGCTATTCTCATTTTTGATGAAGCGACTTCAGCACTCGATTACCGT  
GCCGAGCGTGCGATTACGCGCGAGTTGAAACAGCTTGC GCGTACGTTACAACACTAATCATTGCGCATCGTCTGTCGAC  
CATTACGCATGCGCAACAGATTCTTGTATGGATCAAGGTCGTATCGTTGAGTGTGGCACCCACAGAACATTGCTGAATG  
CAGGTGGCCTATATGCGCAAATGTGGGCATTGCAACACAAGCAGCCTGAATAAGTTTAAACCAGCAAGAAGCATGACTGT  
ATCCGCCATCGGTGGCATTCCCTTAATACAACAGGGGATGATCTTGCCAGATTATTAAGGAGGCGATCCACAAAAACG  
GTATCGCTAGAAAATGGCGACGTGTTAGTGTGCTTGC GCAAAAGATCGTTCAAAGTCCGAAGGACGATGGGCTGACTA  
TCTTCTGTACGCCCCGCAACAAGCTATCGATTTGGCGCAGAAAGTGGATAAAGATCCACGGCTCGTTGAACTGATCCT  
ATCGGAGTCGGCAGAAATCGTTGCACACAGGCAAGACGGTGTACTGATACCGCTCACCGTCTCGGATGCGTGATGGCGA

ATGCCGGTATCGATCATTCCAATGTTGGTGATGAAGACAGTGTGCTTCTGCTTCCGAAAGACCCGGATCACAGTGCACGC  
GAATTAACAAAAACAGTTTCATCGCTTGTGCGGCGTCGATGTCCACATCATCAACGATAGTTTTGGCAGAGTGTGGCG  
CCATGGCACGGCAGGATGCGCAATCGGTGTAGCGGGCTTTTCCCGCTTAAAAATTATATTGGGAAGCCGGATCTGTTT  
GGCAGCTCTTACGAACAACCCAAAGTGGCAGTGGCCGATGAACTCGCCGACGAGCGTCTTTCTTAATGGGACAAGCCGAT  
GAAGGATCGCCTGTTGTGTGATCCGCGGCGCAATTTGCCCCCGCTGATGGAAACGGTCCAGCAGCTTATTCGCCCCAA  
AGAGGAAGATTATTTTCGTGAAACCTCTCCACACTGGCGGTGAAATGGCCTAAACTAGTGGATCCGAATTCGAGCTCG  
GCGCGCTGCAAGTGCACAAGCTTGCAGGCGCATAATGTTAAGTGAACAGAAAGTAATCGTATTGTACACGGCCGAT  
AATCGAAATTAATACGACTCACTATAGGGGAATTGTGAGCGGATAACAATTCCCATCTTAGTATATTAGTTAAGTATAA  
GAAGGAGATATACATATGGCAGATCTCAATTGGATATCGGCCGGCCACGCGATCGCTGACGTGGTACCTCGAGTCTGG  
TAAAGAAACCGCTGCTGCGAAATTTGAACGCCAGCACATGGACTCGTCTACTAGCGCAGCTTAATTAACCTAGGCTGCTG  
CCACCGCTGAGCAATAACTAGCATAACCCCTTGGGGCCTCTAACGGGTCTTGAGGGGTTTTTGTGAAAGGAGGAACT  
ATATCCGGATTGGCGAATGGGACGCGCCCTGTAGCGGCGCATTAAAGCGCGGCGGGTGTGGTGGTTACGCGCAGCGTGACC  
GCTACACTTGCCAGCGCCCTAGCGCCCGCTCCTTTCGTTTCTTCCCTTCTTTCGCCCACGTTCCGCGGCTTTCCCG  
TCAAGCTCTAAATCGGGGGCTCCCTTTAGGGTCCGATTTAGTGCTTTACGGCACCTCGACCCCAAAAAAATTGATTAGG  
GTGATGGTTCACGTAGTGGCCATCGCCCTGATAGACGGTTTTTCGCCCTTTGACGTTGGAGTCCACGTTCTTTAATAGT  
GGACTCTGTTCCAAACTGGAACAACACTCAACCCTATCTCGGTCTATTCTTTGATTTATAAGGGATTTTGCCGATTTC  
GGCCTATTGGTTAAAAAATGAGCTGATTTAACAAAAATTTAACGCGAATTTAACAAAAATATTAACGTTTACAATTTCTG  
GCGGCACGATGGCATGAGATTATCAAAAAGGATCTTACCTAGATCCTTTAAAAATAAAAATGAAGTTTTAAATCAATCT  
AAAGTATATATGAGTAACTTGGTCTGACAGTTACCAATGCTTAATCAGTGAGGCACCTATCTCAGCGATCTGTCTATTT  
CGTTCATCCATAGTTGCCTGACTCCCGTCGTGTAGATAACTACGATACGGGAGGGCTTACCATCTGGCCCCAGTGCTGC  
AATGATACCGGAGACCCAGCTCACCGGCTCCAGATTTATCAGCAATAAACAGCCAGCCGGAAGGGCCGAGCGAGCAAA  
ATGGTCTGCAACTTTATCCGCTCCATCCAGTCTATTAATTGTTCGCGGGAAGCTAGAGTAAGTATCGCCGATTAAG  
AGTTTGCAGCACTGTTGTCATTGCTACAGGCATCGTGGTGTACCGCTCGTCTGTTGGTATGGCTTCATTAGCTCCGG  
TTCCCAACGATCAAGGCGAGTTACATGATCCCCATGTTGTGCAAAAAAGCGGTTAGCTCCTTCGGTCCCGATCGTTG  
TCAGAAGTAAGTTGGCCGAGTGTATCACTCATGGTTATGGCAGCACTGCATAAATCTCTTACTGTCATGCCATCCGTA  
AGATGCTTTTCTGTGACTGGTGTGACTCAACCAAGTCATTCTGAGAATAGTGTATGCGGCGACCGAGTTGCTCTTGCCC  
GGCGTCAATACGGGATAATACCGCGCCACATAGCAGAATTTAAAAGTGCTCATCATTGGAAAACGTTCTTCGGGGCGAA  
AACTCTCAAGGATCTTACCCTGTTGAGATCCAGTTCGATGTAACCCACTCGTGCACCCAAGTATCTCAGCATTTTT  
ACTTTCACCAGCGTTTCTGGGTGAGCAAAAACAGGAAGGCAAAAATGCCGCAAAAAAGGGAATAAGGGCGACACGAAATG  
TTGAATACTCATACTCTTCTTTTCAATCATGATTGAAGCATTATCAGGGTTATTGTCTCATGAGCGGATACATATTT  
GAATGTATTTAGAAAAATAAACAAATAGTTCATGACCAAAAATCCCTTAACGTGAGTTTTCGTTCCTACTGAGCGTCAGACC  
CCGTAGAAAAGATCAAAGGATCTTCTTGAGATCCTTTTTTCTGCGCGTAATCTGCTGCTTGCAAAACAAAAAACCACCG  
CTACCAGCGGTGGTTTGTGTTGCCGGATCAAGAGCTACCAACTCTTTTTCCGAAGGTAAGTGGCTTCAGCAGAGCGCAGAT  
ACCAATACTGTCTTCTAGTGTAGCCGTAGTTAGGCCACCACTTCAAGAACTCTGTAGCACCAGCTACATACTCGCTC  
TGCTAATCTGTTACCAGTGGCTGCTGCCAGTGGCGATAAGTCGTGCTTACCAGGTTGGACTCAAGACGATAGTTACCG  
GATAAGGCGCAGCGGTCCGGCTGAACGGGGGGTTCGTGCACACAGCCAGCTTGGAGCGAACGACCTACACCGAAGTGTG  
ATACCTACAGGTGAGCTATGAGAAAGCGCCACGTTCCCGAAGGGGAAAGCGGACAGGTAACCGGTAAGCGGCAGGG  
TCGGAACAGGAGCGCAGCAGGGAGCTTCCAGGGGAAACGCCTGGTATCTTTATAGTCTGTCCGGTTTCGCCACCTC  
TGACTTGAGCGTCGATTTTTGTGATGCTCGTACAGGGGGCGGAGCCTATGGAAAAACGCCAGCAACGCGGCTTTTTACG  
GTTCTGGCCCTTTTGTGGCCTTTTGTCTACATGTTCTTCTGCGTTATCCCTGATTCTGTGGATAACCGTATTACCG  
CCTTTGAGTGTAGCTGATACCGCTCGCCGACGCCAACGACCGAGCGCAGCGAGTCAAGTGTGAGCGAGGAAGCGGAAGAGCGC  
CTGATGCGGTATTTTCTCTTACGCATCTGTGCGGTATTTACACCCGCATATATGGTGCCTCTCAGTACAATCTGCTCT  
GATGCCGCATAGTTAAGCCAGTATACACTCCGCTATCGCTACGTGACTGGGTCATGGCTGCGCCCCGACACCCGCCAAC  
CCCGCTGACGCGCCCTGACGGCTTGTCTGCTCCCGCATCCGTTACAGACAAGCTGTGACCGTCTCCGGGAGCTGCAT  
GTGTCAGAGGTTTTACCGTCACTACCGAAACGCGCGAGGCAGCTGCGGTAAGCTCATCAGCGTGGTCTGTAAGCGATT  
CACAGATGTCTGCTGTTTATCCGCTCCAGCTCGTTGAGTCTTCCAGAAGCGTTAATGTCTGGCTTCTGATAAAGCGG  
GCCATGTTAAGGGCGGTTTTTCTGTTGGTCACTGATGCCTCCGTGTAAGGGGATTCTGTTTATGGGGGTAATGAT  
ACCGATGAAACGAGAGAGGATGCTCACGATACGGGTTACTGATGATGAACATGCCCGGTTACTGGAACGTTGTGAGGGTA  
AACAACTGGCGGTATGGATGCGGGGGACCAGAGAAAAATCACTCAGGGTCAATGCCAGCGCTTCGTTAATACAGATGTA  
GGTGTTCACAGGGTAGCCAGCAGCATCTGCGATGCAGATCCGGAACATAATGGTGCAGGGCGCTGACTCCCGGTTTC  
CAGACTTACGAAACACGGAACCGAAGACCATTATGTTGTTGCTCAGTTCGACAGCGTTTTGACGAGCAGTCTGCTTC  
ACGTTCTGCTCGCTAGCTCGTCACTGCCCCGCCACCAGGAGGAGTACTGGGTTGAAGGCTCTCAAGGGCATCGTCTGAGA  
TCCCGGTGCTAATGAGTGTAGCTAACTTACATTAATTGCGTTGCGCTCACTGCCCGCTTCCAGTCCGGAAACCTGTCTG  
GCCAGCTGCATTAATGAATCGGCCAACGCGCGGGGAGAGGCGGTTTGGTATTGGGCGCCAGGGTGGTTTTTCTTTTAC  
CAGTGAGACGGGCAACAGCTGATTGCCCTTACCAGCTGGCCCTGAGAGAGTTGCAGCAAGCGGTCCACGCTGGTTTTGCC  
CCAGCAGGCGAAAAATCCTGTTTGTGTTGTTAACGGCGGGATATAACATGAGCTGTCTTCCGGTATCGTCTATCCCACT  
ACCGAGATGTCCGACCAACGCGCAGCCCGACTCGGTAATGGCGCGCATTGCGCCAGCGCCATCTGATCGTTGGCAAC  
CAGCATCGCAGTGGGAACGATGCCCTCATTACGATTTGCATGGTTTGTGAAAACCGGACATGGCACTCCAGTCCGCTT  
CCCGTCCGCTATCGGCTGAATTTGATTGCGAGTGTGATATTTATGCCAGCCAGCCAGACGACGACGCGCCGAGACAGAA  
CTAATGGGCCGCTAACAGCGCGATTTGCTGGTGACCAATGCGACCAGATGCTCCACGCCAGTCCGCTACCGTCTTC  
ATGGGAGAAAAATAACTGTTGATGGGTGTCTGGTCAGAGACATCAAGAAAAAACGCCGGAACATTAGTGCAGGCAGCTT  
CCACAGCAATGGCATCCTGGTTCATCCAGCGGATAGTTAATGATCAGCCCACTGACGCGTTGCGCGGAGAAGATTGTGCACC  
GCCGCTTACAGGCTTCGACGCGCTTCGTTCTACCATCGACACCACGCTGGCACCCAGTTGATCGGGCGGAGATTT

AATCGCCGCGACAATTTGCGACGGCGCGTGCAGGGCCAGACTGGAGGTGGCAACGCCAATCAGCAACGACTGTTTGCCCCG  
CCAGTTGTTGTGCCACGCGGTTGGGAATGTAATTCAGCTCCGCCATCGCCGCTTCCACTTTTCCCGCGTTTTTCGCAGAA  
ACGTGGCTGGCCTGGTTACCACGCGGGAAACGGTCTGATAAGAGACACCGGCATACTCTGCGACATCGTATAACGTTAC  
TGGTTTACATTACCACCCTGAATTGACTCTTCCGGGGCGCTATCATGCCATACCGCGAAAAGTTTTGCGCCATTCTGA  
TGGTGTCCGGGATCTCGACGCTCTCCCTTATGCGACTCTGCATTAGGAAGCAGCCAGTAGTAGGTTGAGGCCGTTGAG  
CACCGCCCGCGCAAGGAATGGTGCATGCAAGGAGATGGCGCCCAACAGTCCCCCGCCACGGGGCCTGCCACCATAACCA  
CGCGAAAACAAGCGCTATGAGCCGAAGTGGCGAGCCCGATTTCCCATCGGTGATGTCGGCGATATAGGCGCCAGCA  
ACCGCACCTGTGGCGCCGTGATGCCGCCCACGATGCGTCCGGCGTAGAGGATCGAGATCGATCTCGATCCCCGCGAAAT  
AATACGACTCACTATA

>pDB071

TAATACGACTCACTATAGGGGAATTGTGAGCGGATAACAATTCCCCTGTAGAAATAATTTTGTTTAACTTTAATAAGGAG  
ATATAACCATGCGTGTGGCTCTGCTGGGCGGTACGGGCAACCTGGGCAAAGGTCTGGCACTGCGTCTGGCAACCCTGGGTC  
ATGAAATCGTGGTGGCTCACGTCGCGAAGAAAAAGCGAAGCCAAAGCGGCCGAATATCGTCGATTGCAGGCGATGCT  
TCGATCACCGGTATGAAAAACGAAGACGCAGCTGAAGCGTGCATATTGCCGTGCTGACCATCCCCTGGGAACATGCAAT  
TGACACGGCTCGTATCTGAAAAATATTCTGCGCGAAAAATCGTTGTTAGTCCGCTGGTGCCGTTTTCCCGTGGTGCCA  
AAGGTTTTACCTACAGCTCTGAACGCTCAGCGGCCGAAATGTTGCGGAAGTCCCTGGAAAAGCGAAAAAGTCTGTCTGCC  
CTGCACACGATCCCAGCTCGTTTTGCAAACCTGGATGAAAAATTCGACTGGGATGTCCCCTGGTGTGGCGATGACGA  
TGAAAGCAAAAAAGTTGTCATGTCACTGATTTCCGAAATTGATGGTCTGCGTCCGCTGGATGCCGCTCCGCTGAGTAAT  
CCCGCTGGTTGAATCTCTGACGCCGCTGATTCTGAACATTATGCGTTTTAACGGTATGGGCGAACTGGGTATCAAAATTT  
CTGTGAGGATCCGAATTCGAGCTCGGCGCGCCTGCAGGTCGACAAGCTTGGCGCCGATAATGCTTAAGTCGAACAGAAA  
GTAATCGTATTGTACAGGCCGATAATCGAAATTAATACGACTACTATAGGGGAATTGTGAGCGGATAACAATTTCCC  
ATCTTAGTATATTAGGATGCAATGGTATGTCTCTCTGTTCTGTCGCCAGCGCAATACGGGCATCTGGCCGCTGCTGC  
CGTTGAAAGCGCCTGAGTGTGCAAAAACCCGGTTGTCTGGCGTTTTAAGCCATGCTGCGCGCAAGCGTTGTTTTTTCC  
ATGGCCAGTCATGTCATTGGTACGTTACGCGCATCGCCTCGGATTGCTTCCCTATTGGTGGTGACCCGTCGGAAGTAC  
GGCGAAATGGCCCGGGCAGCCGGTGTGAGATCTGTGGGGACCACCGGACGAAGGCATGGCGAATGCCTGTTCCGCGAG  
CGATGGCTCATATTGCGGCAGCAGGCGGAGAGCGTGTGATGTTTGTCCCCGGTATTGCCCCTGTTGGATGGGGCGGCC  
ATCGACATGTTGAGCCGTGCACCGTGCATGCGATTGGCATGGCGCCAAACCGGGACGGTATGGCACGAATGGGCTGAT  
TTGCCGACCTGGCGCTATTCCGTTGTTTTAGCGGGCCAAGCTTTCCGCTCATAAAACGCCGCTCGGTGCGCCGGAA  
TTGATGTTTGGATTGTCCGTTCAAGAGAGTGGGCGTTGGATGTAGACTTGCTGCCGACCTTGAGGAATTCGAGTCTTCC  
ATCAAAGACGCCAAGAGGAGGGTGCTATGCCAAATCTAGTAAGCAATCTATTTACAAAATGATCCAAGAGGTCGAACGT  
TCCGCTAAGGGCAGTCAGCCAAGGCTAGATGACAAGGCTTTGGCGTATGAGCTTGAAGCGGTGCAAGATTGGCGTGAGT  
GGCGGGTCTGGCATCGGCATGGCGGATATCGGTTGGGGCAACGTCATCACCTATTCGCGCAAGGTTTTATTCCGCTCA  
CCCATCTTTGTGAGATGTTTGCCACTACTGCACCTTTGCCAAAGCGCCACGGGTGATTGGCCAAGCATTCTTACCCTG  
GACCAAGCGCTGGACATTGCGCGGGCGGGTGTGCAGTTGGCTGTCGTGAGGCTTTGTTTACGCTCGGAGATCGGCCCGA  
AGCGCGTTATGCCGTGCACGCGATGCGTGCAGCAACTGGGTGATGCTACGACAGCCGACTATGTCGCTGAGGTGCGCG  
AACCGGTACGAGCTGAAACCGGGCTGTGCCCACTTTAATATGGGCGTGTAAAGCGCGCAGAATACCAGATGCTGCGG  
CCCCGATCCCCCTTCTTCGGGTTGATGCTAGAGACGGTCTGAAACGCTTCCGCTTGGCGGCAAGCGCATATACCGAT  
TGATTGGTATCGGGGAGACACGCGCGAGCGGCTGAAATCGCTCTTTCGCTGCGGGATTTCATGATCGCTATGGTCAT  
GTGCAGGAGGTCATTATTCAGAACTTTCGCGCGAAACCCGGCACAAAATGGTTAACGCGCCTGAGCCGTCGAATGGACGA  
ATTGTGTTGGACAACAGCGGTCGCCCGTTGGTCTGGGTTCCGCAATGAGCATCCAGGTGCCGCTAATCTTTTCGACG  
GTGACTTGACCGATTGATTTCGCGCGGGAATCAATGATTGGGGCGGCGTATCGCCGGTACGCGCTGATCACGTTAATCCA  
GAAGCGCCGTGGCCGCACCTTGACCGTTAAGTGAGGATACAGACAGGGGCGGGAAGACGTTGACCGAGCGGATAACCGT  
CTATCTGCCTATATCGAGGAACGTGATCGTTGGATCGACCCGGGCTTGCATGCTGATGTGCTACGCCATTACAGATTGCA  
GTGGATTGGCAACAAGCGATATCTGAAAAGCCGGTCCACGACGATAGGGGATATCGCTTGCCTGGCAGTCACTCCCAG  
GCTTCCCAGTTGATCGTGTGGTTCGACAGCAGATCGATATCGTCGAGAAATGCGTGGCGGGTGAGCGCCTCGAAGAAGC  
CGAGCTTGTACATTTATTTAACGCACGCGCCATGATTTTACGCATGTGACGCACACGGCGGACCGTTGCGCAGGCAGA  
CAAAGGGCGACACGATCACTTACGTTGTAATCGGAACATCAACTACACCAACGCTGTCGCAATACCATTGCAATTTTTGT  
GCTTTTTACGAGGACCGATACAAGAAGACTTGCAGCGAAAAAGCCCTATATCGTTGACCTCAACGAAATCCGTCGCCGCGT  
CAAAGAAGCGTGGGATCGAGGGGCGACGGAGGTCTGCTTGAAGGGGGCATTATCCCGACTATACGGGACGTAATTTATC  
TTGACATCTGCGAAGCGGCTAAAAACAGAATGTCCAGACATGCACATTCACGCCTTTTCGCCCTTGAGGTGCTGCATGGT  
GCCACGACCTGGGGACGTCATACGCGCTTTTTTGTCTGATTTGAAAAGCGCTGGATTAAGTACGTTGACGTTGACCGC  
AGCCGAGATCTGGACGACGAAGTGGCGGACAAAATCTGTCCGATAAGTTGAATACGCAAGAATGGTTGACCGTGTGCG  
GATCGGCACATGAGTTGGGATTGCGGACCACTTGCACGATCATGTTCCGTCATGTCGAATCGTATAAGCATTGGGCGCGA  
CATATCCTCAGCTTGGCGAGCTGCAACGTGATACAGGCGGGTACTGAGTTGTTCCATTGCCTTTTGTCCATGAGGA  
AGCGCCATTATTTAAAAAGAAAGGTGCGCGTACAGGGCCGACTTTACGAGAAGCCATTTTGATGCATGCCGTCGGGCGTC  
TGGCGTTTCATGGCTTGATTGACAATATTCAAACGCTTTGGGTGAAAAATGGGTGAGCACGGCGCACAGCTTTGCTTGCAG  
GCGGGGGCTAACGATTTGGGCGGTACCCTAATGAATGAATCGATTAGCCGCGCAGCCGGTGCAGCCCACGGACAGGAAAT  
GCCGCTGCCGCCATGGAAGCCCTGGCCGCCAGACTCGGGCGCAATGCGATGCAGCGTACCCCGCTTATCGTAAACGTC  
GTCCTGAGCGGCAGCAAGCTTCGCATGCTGCTCCTGCGCTGGTGCCTGTGCGATTACTAAGGCCGGACGCTTGGTGCCT  
GGGCACGGCCATCAGGTCTTGTGTAAGCGGAACAATGATTGGACCTGCATAGGTGGATCATAGGTGGATTTCATGGTGTG  
GCTTGCATGTTGGCAGCCTCAAATCGATGTTGTGATGGCTCTCACGCGCGCTTCCCATCATGGATTACCAAGGTGCTT  
AATTACCCTATTAATAGACAGACGCTATTCGGTTGACACGATCGGAAGGGTGTGCGTTTGGGTGAGAGAAATGCTT  
GATCTTTACGCAGGAAGATAATGGCAAAGTATGTTGCGTTGTGCGGCGGGTGGGCGGCGCTAAGCTGGCCTATGGTCTA

GCGCAGGTGCTTTCTGCCGACGAGTTGACGATCGTTGTGAACACGGGCGACGATTTGAGCATCTTGGCTTGCTCATCTG  
TCCAGACCTGGACACGGTGTCTATACGCTGGCCGATGTGGCAGATGCAAAAAAGGATGGGGGCGGGCGAACGAGAGCT  
GGTCTTCGCAAGAAGCGCTCGCTCGTTTGGGCGGACCGGTTTGGTTCAGCTGGGTGACAAGGACCTTGCCTGCATCTT  
TATCGGCGCAGCTTGCTTACGGTGGTGGCAGCTTGTGTGATGTAACCGAGACCATTGCGAAAGCGTTAGGTGTCAAGCA  
TTCAATCGTCCAATGTCTGATGATCCGGTCAGAACCATCGTTGAGACAGACGAAGGCGATTTGCCTTTCAGACGTATT  
TCGTTAAACGGCGATGTGAGCCACGCGTGTGCGGGTCCGCTTTGAAGGGCTTCGCTAGCACGTTTATCGTCGCCATTT  
GAAGCAGCGTTGAGTACGCCTGACCTGGCTGGCTGAATCTTATGCCCTTCGAATCCTTTTGTACAGCATTTGGACCGATTCT  
GGCATTACCGGGCGTGCCTGACAGGCTGCATGCGTGAATGTGCCGTGTTTAGCTGTTGCGCCGCTTGTGCGGTGGTGAAG  
CAGTCAAAGGCCCGTTGACTAAGATGATGCATGAACTGGGCATGAGTGTTCGGTTGGCGAGATTGCTTCCGTTTATGCT  
GATTTCCCTTGATCTGCTGGTGATTGATCCGTTGGATGAATGCGATCATGATCTTTTTCGTAAGGATCGTGTGGCAGTCAA  
TAAAGTCAAGACGCTCATGACAACACCTGATGAGCGTATCGCGCTTGCAGCACACGCTGCTGGCTTGCCTTGAACATCACC  
GAAACAATCGACAGACAGCTCACGTTGTGACGACAGCACCCGATAACGAGTCTGGTAAAGAAACCGCTGCTGCGAAATT  
TGAACGCCAGCACATGGACTCGTCTACTAGCGCAGCTTAATTAACCTAGGCTGCTGCCACCGCTGAGCAATAACTAGCAT  
AACCCCTTGGGGCCTCTAAACGGGTCTTGGGGGTTTTTGTGAAACCTCAGGCATTTGAGAAGCACACGGTCACACTG  
CTTCCGGTAGTCAATAAACCGGTAAACCAGCAATAGACATAAGCGGCTATTTAACGACCCTGCCCTGAACCGACGACCGG  
GTCATCGTGGCCGATCTTGCAGCCCTCGGCTTGAACGAATGTTAGACATTATTTGCCGACTACCTTGGTGATCTCGC  
CTTTCACGTAGTGGACAAAATTCTTCAACTGATCTGCGCGGAGGCCAAGCGATCTTCTTCTTGTCCAAGATAAGCCTGT  
CTAGCTTCAAGTATGACGGGCTGATACTGGGCGGCGAGGCGCTCCATTGCCAGTCGGCAGCGACATCCTTCCGCGCGAT  
TTTCCCGTTACTGCGCTGTACCAAATGCGGGACAACGTAAGCACTACATTTGCTCATCGCCAGCCAGTCGGGCGGCG  
AGTTCATAGCGTTAAGGTTTCATTTAGCGCCTCAAATAGATCCTGTTCCAGGAACCGGATCAAAGAGTTCCTCCGCCCT  
GGACCTACCAAGCAACGCTATGTTCTCTTGTCTTGTGTCAGCAAGATAGCCAGATCAATGTGATCGTGGCTGGCTCGAA  
GATACTCGAAGAATGCTATGCGCTGCCATTCTCAAATTCAGATTCGCGCTTAGCTGGATAACGCCACGGAATGATGT  
CGTCTGCACAACAATGGTGACTTCTACAGCGCGGAGAATCTGCTCTCTCCAGGGGAAGCCGAAGTTTCAAAGGTCG  
TTGATCAAAGCTCGCCGCTTGTTCATCAAGCCTACGGTACCAGTAACCAGCAAATCAATACACTGTGTGGCTTCAG  
GCCGCCATCCACTGCGGAGCCGTACAAATGTACGGCCAGCAACGTCGGTTCGAGATGGCGCTCGATGACGCCAACTACCT  
CTGATAGTTGAGTCGATACTTCCGGCATCACCCTTCCCTCATACTCTTCTTTTCAATATTATTGAAGCATTTATCAG  
GGTTATTGTCTCATGAGCGGATACATAATTTGAATGTATTTAGAAAAATAAACAAATAGCTAGCTCACTCGTCTGCTACGC  
TCCGGGCGTGAGACTGCGGCGGGCGCTGCGGACACATACAAAGTTACCCACAGATTCCGTGGATAAGCAGGGGACTAACA  
TGTGAGGCAAAACAGCAGGGCCGCGCCGGTGGCGTTTTTCCATAGGCTCCGCCCTCTGCCAGATTCACATAAACAGAC  
GCTTTCCGGTGCATCTGTGGGAGCCGTGAGGCTCAACCATGAATCTGACAGTACGGGCGAAACCCGACAGGACTTAAAG  
ATCCCCACCGTTCCGGGCGGGTCGCTCCCTCTGCGCTCTCTGTTCCGACCCTGCCGTTTACCGGATACCTGTTCCGCC  
TTTCTCCCTTACGGGAAGTGTGGCGCTTCTCATAGCTCACACACTGGTATCTCGGCTCGGTGTAGGTCGTTCCGCTCAA  
GCTGGGCTGTAAGCAAGAACTCCCCGTTACGCCGACTGCTGCGCCTTATCCGGTAACTGTTCACTTGAGTCCAACCCGG  
AAAAGCACGGTAAAACGCCACTGGCAGCAGCCATTGGTAACTGGGAGTTCGAGAGGATTTGTTTAGCTAAACACGCGGT  
TGCTCTTGAAGTGTGCGCAAAGTCCGGTACACTGGAAGGACAGATTTGGTTGCTGTGCTCTGCGAAAGCCAGTTACCA  
CGGTTAAGCAGTCCCAACTGACTTAACCTTCGATCAAACCACCTCCCAGGTGGTTTTTTCGTTTACAGGGCAAAAAGA  
TTACGCGCAGAAAAAAGGATCTCAAGAAGATCCTTTGATCTTTTACTGAAACCGCTCTAGATTTCCAGTCAAAATTTATC  
TCTCAAATGTAGCAACTGAAGTCAAGCCCATACGATAAGTTGTAATTTCTCATGTTAGTCACTCCCGCGCCACCGG  
AAGGAGCTGACTGGGTTGAAGGCTCTCAAGGGCATCGGTGAGATCCCGGTGCCTAATGAGTGAGCTAAGTACATTAAT  
TGCGTTGCGCTCACTGCCGCTTTCAGTCCGGAAACCTGTCGTGCCAGCTGCATTAATGAATCGGCCAACGCGCGGGGA  
GAGGCGTTTTGCGTATTGGGCGCCAGGGTGGTTTTTCTTTTACCAGTGTGACGGGCAACAGCTGATTGCCCTCACCCG  
CTGGCCCTGAGAGAGTTGCAGCAAGCGGTCCACGCTGGTTTGGCCAGCAGGCGAAAATCCTGTTTGTGTTGGTAAACG  
GCGGGATATAACATGAGCTGTCTTCGGTATCGTCTGATCCCACTACCGAGATGTCCGCACCAACGCGCAGCCCGGACTCG  
GTAATGGCGCGCATTGCGCCAGCGCCATCTGATCGTTGGCAACCAGCATCGCAGTGGGAACGATGCCCTCATTGAGCAT  
TTGCATGGTTTGTGAAAACCGGACATGGCACTCCAGTCCGCTTCCCGTCCGCTATCGGCTGAATTTGATTGCGAGTGA  
GATATTTATGCCAGCCAGCCAGACGCGAGCAGCGCCGAGACAGAATTAATGGGCCCCGCTAACAGCGCGATTTGCTGGTGA  
CCCAATGCGACCAGATGCTCCACGCCAGTCCGCTTCCATGGGAGAAAATAAATACTGTTGATGGGTGTCTGGTC  
AGAGACATCAAGAAATAACGCCGGAACATTAGTGCAGGCAGCTTCCACAGCAATGGCATCCTGGTCATCCAGCGGATAGT  
TAATGATCAGCCACTGACGCGTTGCGCGAGAAGATTGTGCACCGCCGCTTACAGGCTTCGACGCCGCTTCCGTTCTACC  
ATCGACACCACCAGCTGGCACCCAGTTGATCGGCGCGAGATTTAATCGCCGCGACAATTTGCGACGGCGCGTGCAGGGC  
CAGACTGGAGGTGGCAACGCCAATCAGCAACGACTGTTTGGCCGCAAGTGTGTTGCCACGCGGTTGGGAATGTAATTCA  
GCTCCGCCATCGCCGCTTCCACTTTTCCCGCTTTTCGAGAAAACGTTGGCTGGCTGACCATCCACCGGGAAACGGTC  
TGATAAGAGACACCGGCATACTCTGCGACATCGTATAACGTTACTGTTTACATTCACCACCCTGAATTGACTCTCTTC  
CGGGCGCTATCATGCCATAACCGGAAAGGTTTTGCGCCATTGATGGTGTCCGGGATCTCGACGCTCTCCCTTATGCGAC  
TCCTGCATTAGGAAAT

>pDL008

GCGCCAGCAACCGCACCTGTGGCGCCGGTGTATGCCGGCCACGATGCGTCCGGCGTAGAGGATCGAGATCTCGATCCC  
AAATTAATACGACTACTATAGGGGAATTTGTGAGCGGATAACAATCCCCTCTAGAAAATAATTTGTTAACTTAAAGAA  
GGAGATATAACCATGCGTGTGGCTCTGCTGGGCGGTACGGGCAACCTGGGCAAGGTCTGGCACTGCGTCTGGCAACCTG  
GGTCATGAAATCGTGGTTCGCTACGTCGCGAAGAAAAAGCGGAAGCCAAAGCGCCGAATATCGTCGATTGCAGGCGA  
TGCTTCGATACCCGGTATGAAAAACGAAGACGAGCTGAAGCGTGCATATTGCCGTGCTGACCATCCCGTGGGAACATG  
CAATTGACACGGCTCGTATCTGAAAAATATTCTGCGCGAAAAATCGTTGTTAGTCCGCTGGTCCGGTTTCCCGTGGT  
GCCAAAGGTTTTACCTACAGCTCTGAACGCTCAGCGGCCGAAATGTTGCCGGAAGTCTTGAAAAGCGAAAAAGTCGTGTC  
TGCCCTGCACAGATCCCAGCAGCTCGTTTTGCAAACCTGGATGAAAAATTCGACTGGGATGTCCCGGTGTGTGGCGATG



















GGTTGGACTCAAGACGATAGTTACCGGATAAGGCGCAGCGGTTCGGGCTGAACGGGGGGTTCGTGCACACAGCCCAGCTTG  
GAGCGAACGACCTACACCGAACTGAGATACCTACAGCGTGAGCTATGAGAAAAGCGCCACGCTTCCCGAAGGGAGAAAAGGC  
GGACAGGTATCCGGTAAGCGGCAGGGTCGGAACAGGAGAGCGCACGAGGGAGCTTCCAGGGGGAAACGCCTGGTATCTTT  
ATAGTCTGTGCGGTTTTCGCCACCTCTGACTTGAGCGTCGATTTTTGTGATGCTCGTCAGGGGGGCGGAGCCTATGGAAA  
AACGCCAGCAACGCGGCCTTTTTACGGTTCCTGGCCTTTTGTGGCCTTTTGTGCATGTTCTTTCTCGCTTATCCCC  
TGATTCTGTGGATAACCGTATTACCGCCTTTGAGTGAGCTGATACCGCTCGCCGAGCCGAACGACCGAGCGCAGCGAGT  
CAGTGAGCGAGGAAGCGGAAGAGCGCCTGATGCGGTATTTTCTCCTTACGCATCTGTGCGGTATTTACACCCGCATATAT  
GGTGCACTCTCAGTACAATCTGCTCTGATGCCGCATAGTTAAGCCAGTATACACTCCGCTATCGCTACGTGACTGGGTCA  
TGGCTGCGCCCGACACCCGCCAACACCCGCTGACGCGCCCTGACGGGCTTGTCTGCTCCCGGCATCCGCTTACAGACAA  
GCTGTGACCGTCTCCGGGAGCTGCATGTGTGTCAGAGGTTTTACCCGTCATCACCGAAAACGCGCGAGGCAGCTGCGGTAAG  
CTCATCAGCGTGGTCGTGAAGCGATTACAGATGTCTGCCTGTTTATCCGCGTCCAGCTCGTTGAGTTTCTCCAGAAGCG  
TTAATGTCTGGCTTCTGATAAAGCGGGCCATGTTAAGGGCGGTTTTTCTGTTTGGTCACTGATGCCTCCGTGTAAGGG  
GGATTTCTGTTTATGGGGTAATGATACCGATGAAACGAGAGAGGATGCTCACGATACGGGTTACTGATGATGAACATGC  
CCGGTACTGGAACGTTGTGAGGGTAAACAACCTGGCGGTATGGATGCGGGCGGGACCAGAGAAAAATCACTCAGGGTCAAT  
GCCAGCGCTTCGTTAATACAGATGTAGGTGTTCCACAGGGTAGCCAGCAGCATCTGCGATGCAGATCCGGAACATAATG  
GTGCAGGGCGCTGACTTCCGCGTTTTCCAGACTTTACGAAACACGGAACCGAAGACCATTATGTTGTTGCTCAGGTCCG  
AGACGTTTTGCAGCAGCAGTCGCTTACGTTTCGCTCGCGTATCGGTGATTCACTCTGCTAACCCAGTAAGGCAACCCCGCC  
AGCCTAGCCGGTCTCAACGACAGGAGCACGATCATGCGCACCCGTTGGGGCCGCCATGCCGGCGATAATGGCCTGCTTC  
TCGCCGAAACGTTTGGTGGCGGGACCAGTGACGAAGGCTTGAGCGAGGGCGTGCAAGATTCCGAATACCGCAAGCGACAG  
GCCGATCATCGTCGCGCTCCAGCGAAAGCGGTCTCGCCGAAAATGACCCAGAGCGCTGCCGGCACCTGTCTACGAGTT  
GCATGATAAAGAAGACAGTCATAAGTGCGGCGACGATAGTCATGCCCCGCGCCACCAGGAAGGAGCTGACTGGGTTGAAG  
GCTCTCAAGGGCATCGGTGAGATCCCGGTGCCTAATGAGTGAGCTAACTTACATTAATTGCGTTGCGCTCACTGCCCGC  
TTTCAGTCGGGAAACCTGTCGTGCCAGCTGCATTAATGAATCGGCCAACGCGCGGGGAGAGGCGGTTTGCCTATTGGGC  
GCCAGGGTGGTTTTTCTTTTACCAGTGAGACGGGCAACAGCTGATTGCCCTTACCAGCCTGGCCCTGAGAGAGTTGCAG  
CAAGCGGTCCACGCTGGTTTGCCCCAGCAGGCGAAAAATCCTGTTTGTGTTGGTAAACGGCGGGATATAACATGAGCTGT  
CTTCGGTATCGTCGTATCCCACTACCGAGATATCCGCACCAACGCGCAGCCCGACTCGGTAATGGCGCGCATTGCGCCC  
AGCGCCATCTGATCGTTGGCAACCAGCATCGCAGTGGGAACGATGCCCTCATTAGCATTGTCATGGTTTTGTTGAAAACC  
GGACATGGCACTCCAGTCGCTTCCCGTCCGCTATCGGCTGAATTTGATTGCGAGTGAGATATTTATGCCAGCCAGCCA  
GACGCAGACGCGCCGAGACAGAACTTAATGGGCCCCGTAACAGCGCGATTTGCTGGTGACCCAATGCGACCAGATGCTCC  
ACGCCCAGTCGCGTACCGTCTTCATGGGAGAAAATAATACTGTTGATGGGTGTCTGGTCAGAGACATCAAGAAAATAACGC  
CGGAACATTAGTGCAGGCAGCTTCCACAGCAATGGCATCCTGGTCATCCAGCGGATAGTTAATGATCAGCCCACTGACGC  
GTTGCGCGAGAAGATTGTGCACCCGCGCTTTACAGGCTTCGACGCGCTTCGTTTCTACCATCGACACCACCACGCTGGCA  
CCCAGTTGATCGGCGCGAGATTTAATCGCCGCGACAATTTGCGACGGCGCGTGCAGGGCCAGACTGGAGGTGGCAACGCC  
AATCAGCAACGACTGTTTGCCCGCCAGTTGTTGTGCCACGCGGTTGGGAATGTAATTCAGCTCCGCCATCGCCGTTCCA  
CTTTTTCCCGGTTTTTCGAGAAACGTGGCTGGCCTGGTTACCACGCGGGAAACGGTCTGATAAGAGACACCGGCATAC  
TCTGCGACATCGTATAACGTTACTGGTTTACATTCACCACCCTGAATTGACTCTCTTCCGGGCGCTATCATGCCATACC  
GCGAAAGGTTTTGCGCCATTGATGGTGTCCGGGATCTCGACGCTCTCCCTTATGCGACTCCTGCATTAGGAAGCAGCC  
AGTAGTAGTTGAGGCGTTGAGCACCGCCCGCAAGGAATGGTGCATGCAAGGAGATGGCGCCCAACAGTCCCCCGGC  
CACGGGGCCTGCCACCATACCCACGCCGAAACAAGCGCTCATGAGCCCCAAGTGGCGAGCCCGATCTTCCCCATCGGTGA  
TGTCGGCGATATAG

### 3 References

1. Partida-Martinez LP, Monajembashi S, Greulich KO, & Hertweck C (2007) Endosymbiont-dependent host reproduction maintains bacterial-fungal mutualism. *Curr Biol* 17(9):773-777.
2. Partida-Martinez LP, et al. (2007) *Burkholderia rhizoxinica* sp. nov. and *Burkholderia endofungorum* sp. nov., bacterial endosymbionts of the plant-pathogenic fungus *Rhizopus microsporus*. *Int J Syst Evol Microbiol* 57(Pt 11):2583-2590.
3. Li C, et al. (2011) FastCloning: a highly simplified, purification-free, sequence- and ligation-independent PCR cloning method. *BMC Biotechnol* 11:92.
4. Bashiri G, Rehan AM, Greenwood DR, Dickson JM, & Baker EN (2010) Metabolic engineering of cofactor F420 production in *Mycobacterium smegmatis*. *PLoS One* 5(12):e15803.
5. Graupner M & White RH (2001) Biosynthesis of the phosphodiester bond in coenzyme F(420) in the methanoarchaea. *Biochemistry* 40(36):10859-10872.
6. Grochowski LL, Xu H, & White RH (2008) Identification and characterization of the 2-phospho-L-lactate guanylyltransferase involved in coenzyme F<sub>420</sub> biosynthesis. *Biochemistry* 47(9):3033-3037.
7. Kalyani DC, et al. (2012) Effectual decolorization and detoxification of triphenylmethane dye malachite green (MG) by *Pseudomonas aeruginosa* NCIM 2074 and its enzyme system. *Clean Technol Envir* 14(5):989-1001.
8. Eirich LD, Vogels GD, & Wolfe RS (1978) Proposed structure for coenzyme F<sub>420</sub> from *Methanobacterium*. *Biochemistry* 17(22):4583-4593.
